# Supplementary material
Source: PubMed Central journal article supplement (PMC6641037)

# **Metal- and solvent-free approach to access 3-Se/S-chromones from the cyclization of enamines in the presence of dichalcogenides catalyzed by $\text{KIO}_3$**

Jamal Rafique,<sup>†</sup> Sumbal Saba,<sup>‡,†</sup> Alex R. Schneider,<sup>†</sup> Marcelo S. Franco,<sup>†</sup> Symara M. Silva<sup>†</sup> and Antonio L. Braga<sup>†\*</sup>

<sup>†</sup> Departamento de Química, Universidade Federal de Santa Catarina, Florianópolis 88040-900, SC-Brazil.

<http://labselen.ufsc.br>

Fax: +55 48 3721 6427; Tel: +55 48 37216427; E-mail: [braga.antonio@ufsc.br](mailto:braga.antonio@ufsc.br)

<sup>‡</sup> Department of chemistry, Shaheed Benazir Bhutto Women University, Peshawar 25000, KPK, Pakistan

## **Table of Contents**

|                                                                                                         |           |
|---------------------------------------------------------------------------------------------------------|-----------|
| <b>I. Copies of <math>^1\text{H}</math> and <math>^{13}\text{C}</math> NMR Spectra of Products.....</b> | <b>S2</b> |
|---------------------------------------------------------------------------------------------------------|-----------|

## I. NMR Spectra

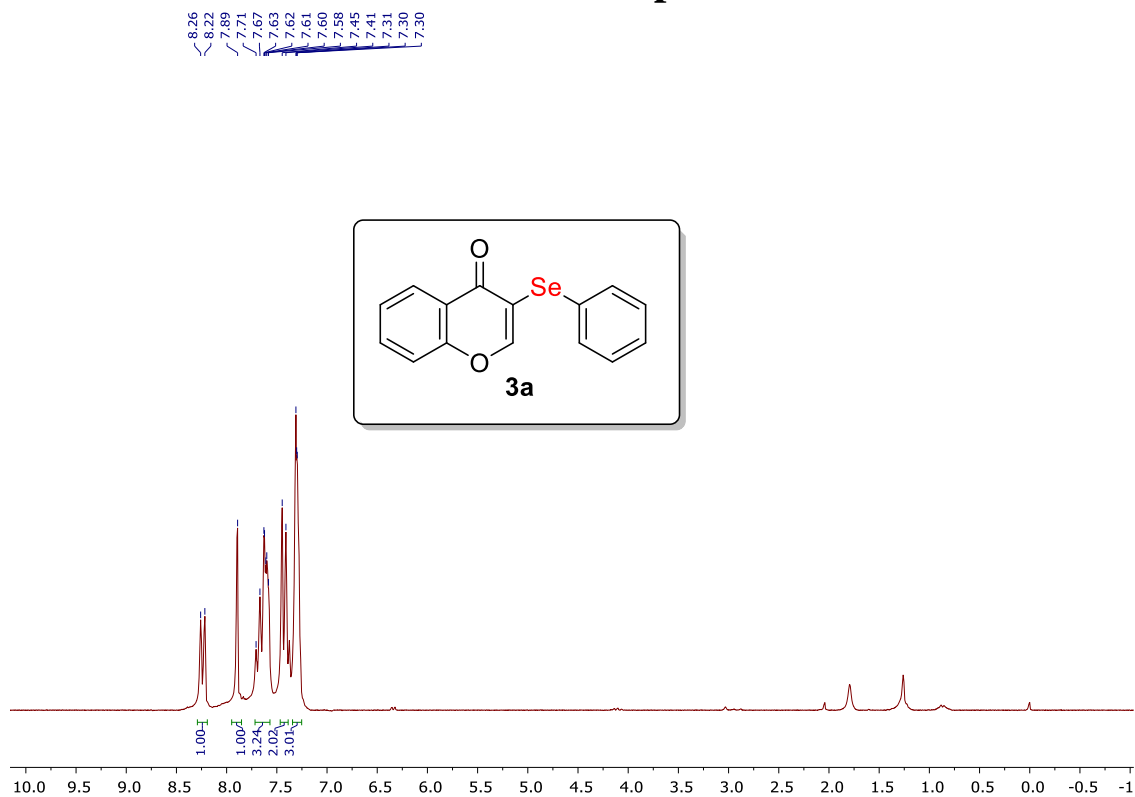Figure S1. <sup>1</sup>H NMR (200 MHz, CDCl<sub>3</sub>) spectrum of **3a**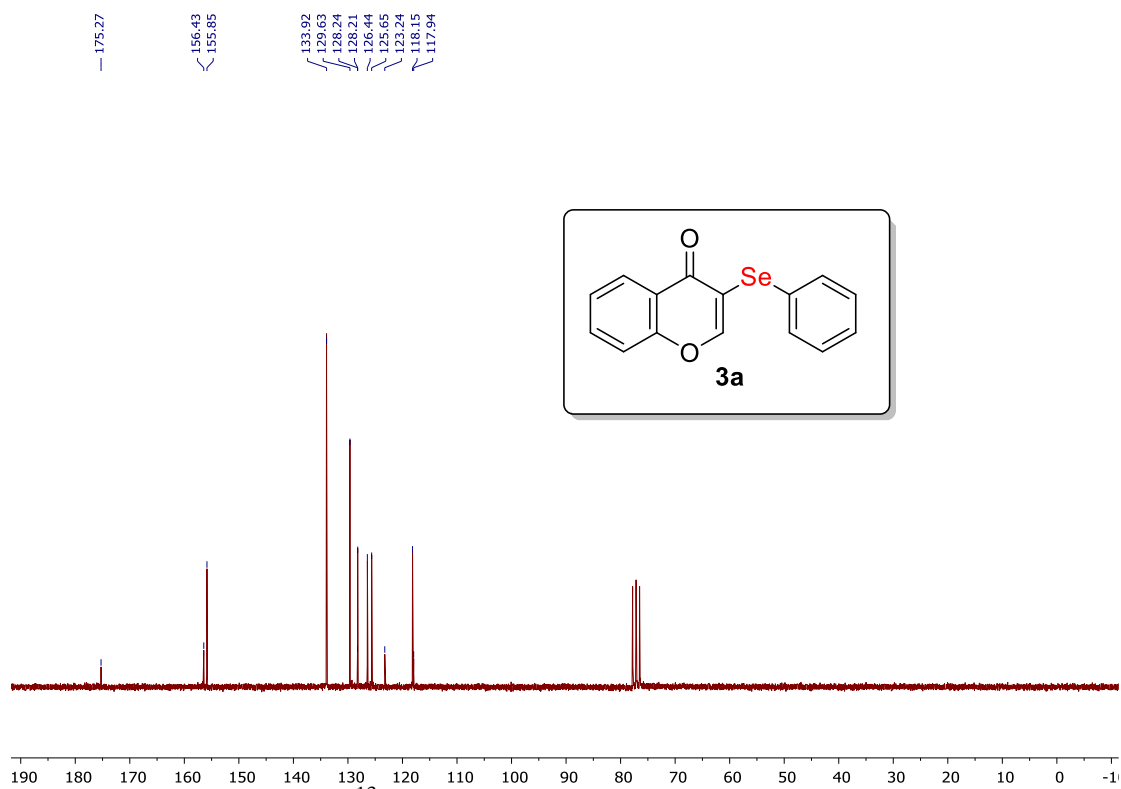Figure S2. <sup>13</sup>C NMR (50 MHz, CDCl<sub>3</sub>) spectrum of **3a**

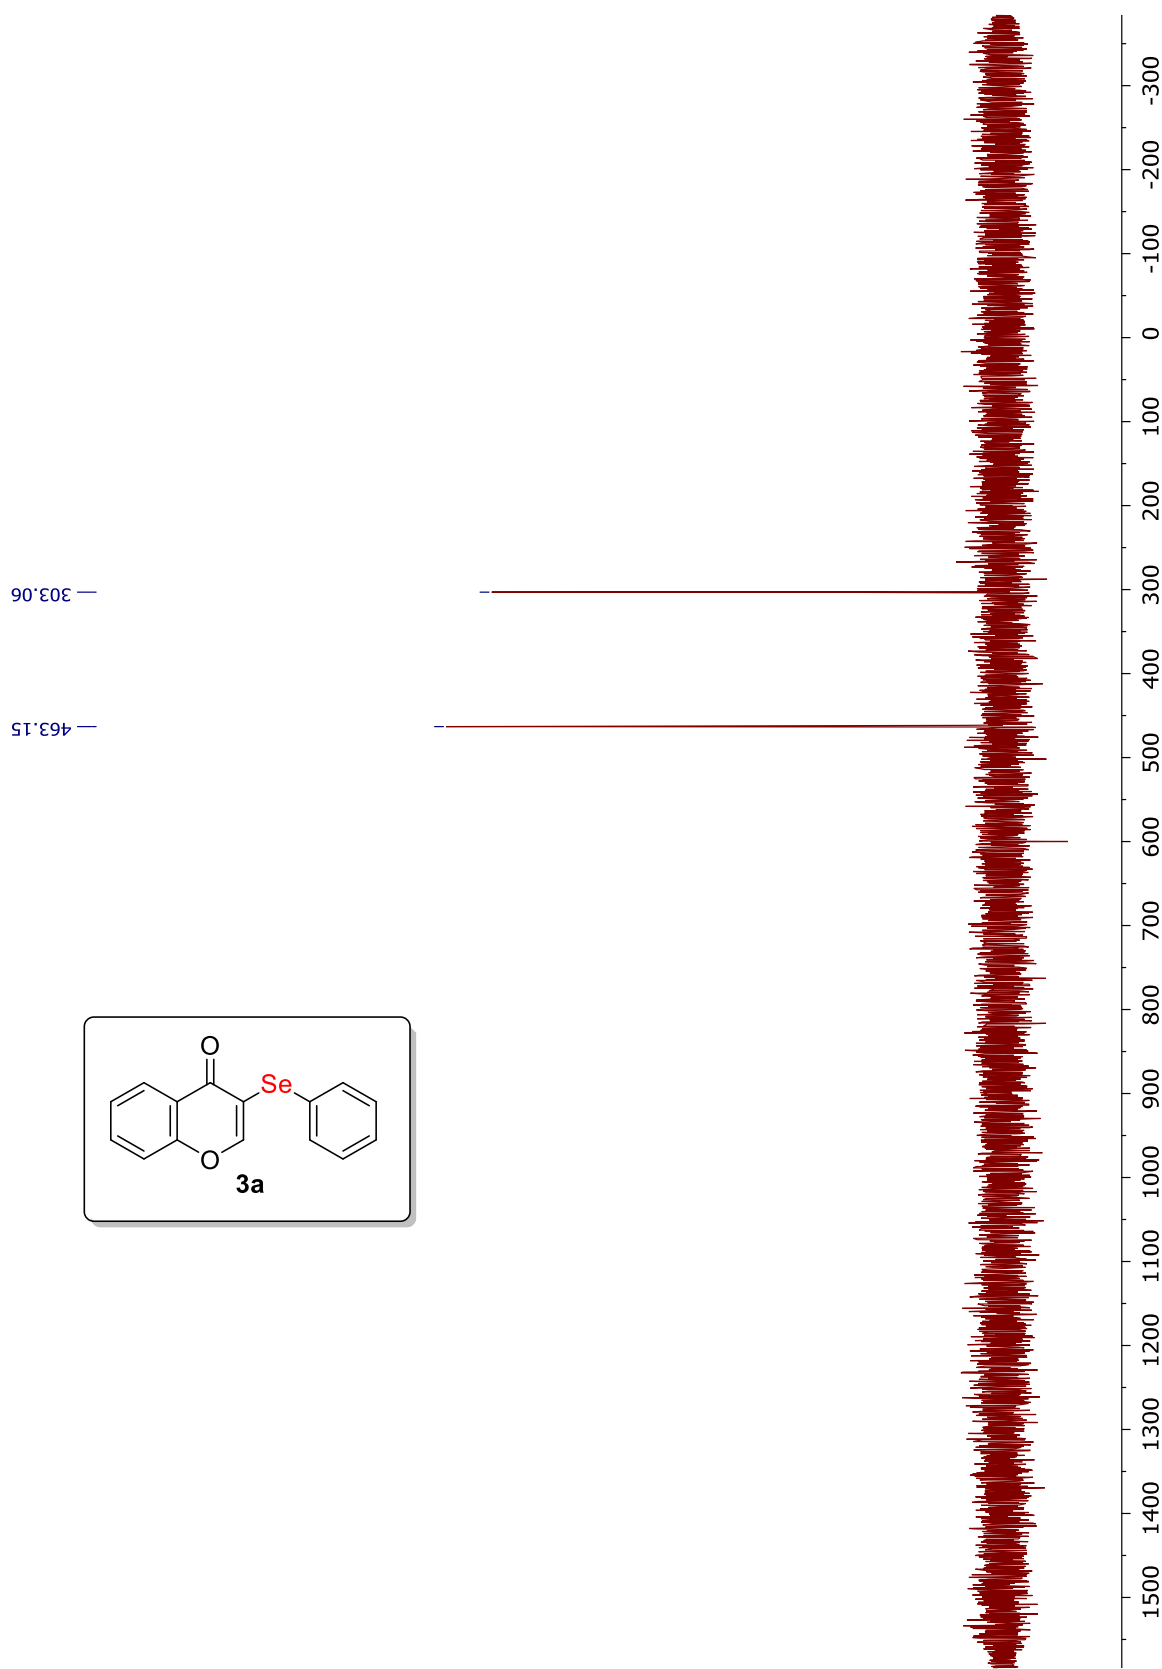

Figure S3.  $^{77}\text{Se}$  NMR (38.14 MHz,  $\text{CDCl}_3$ ) spectrum of **3a**

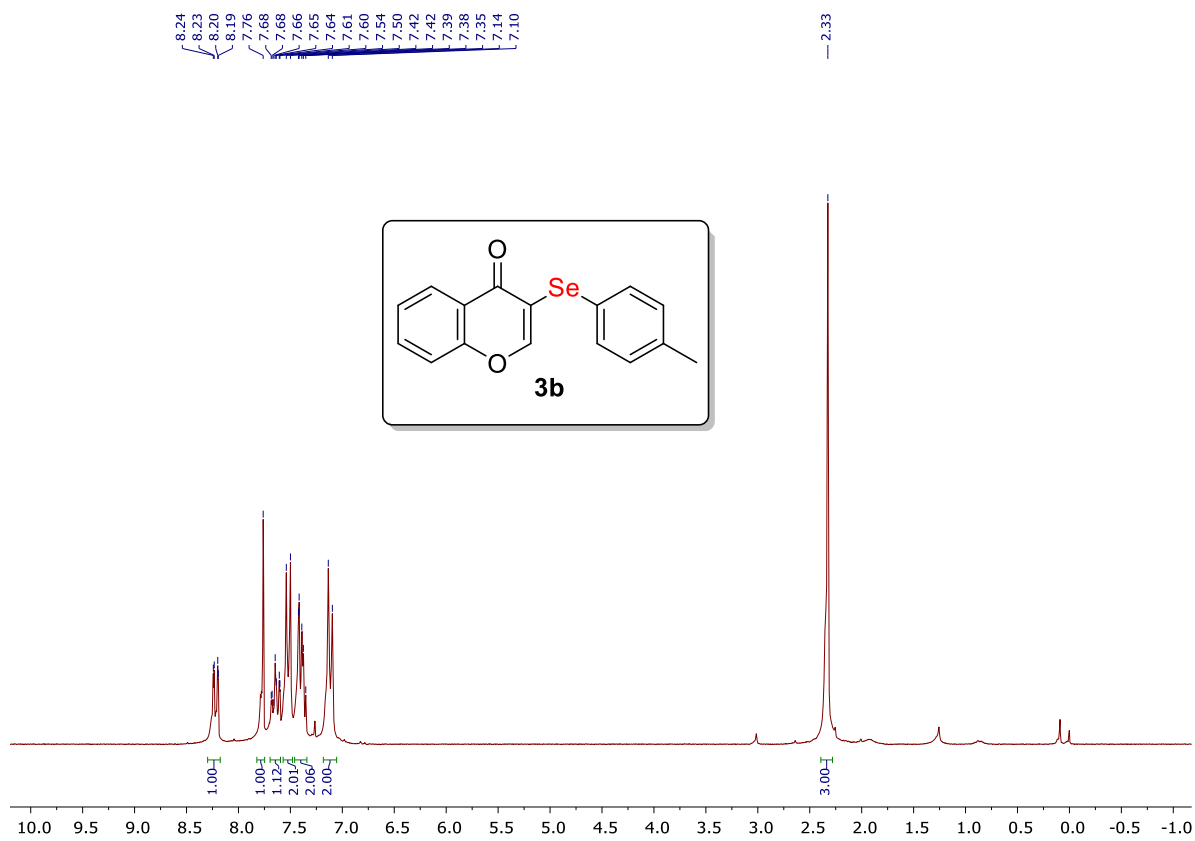Figure S4. <sup>1</sup>H NMR (200 MHz, CDCl<sub>3</sub>) spectrum of **3b**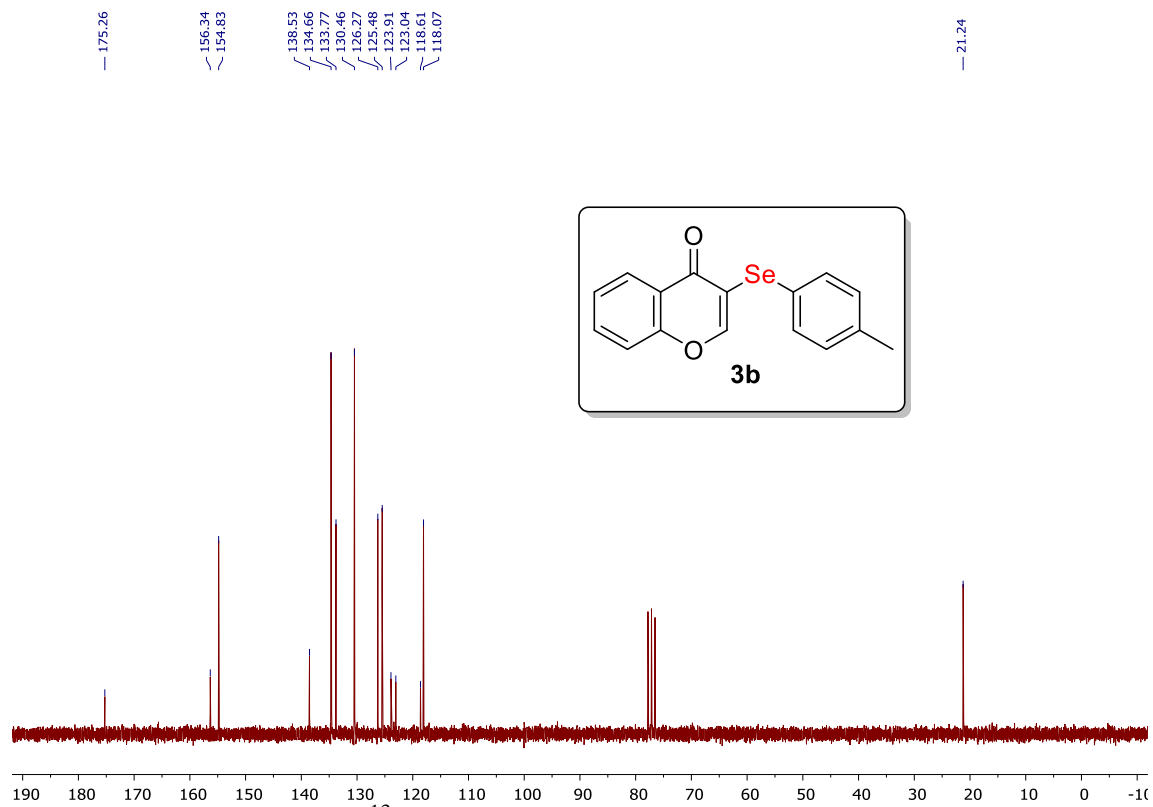Figure S5. <sup>13</sup>C NMR (50 MHz, CDCl<sub>3</sub>) spectrum of **3b**

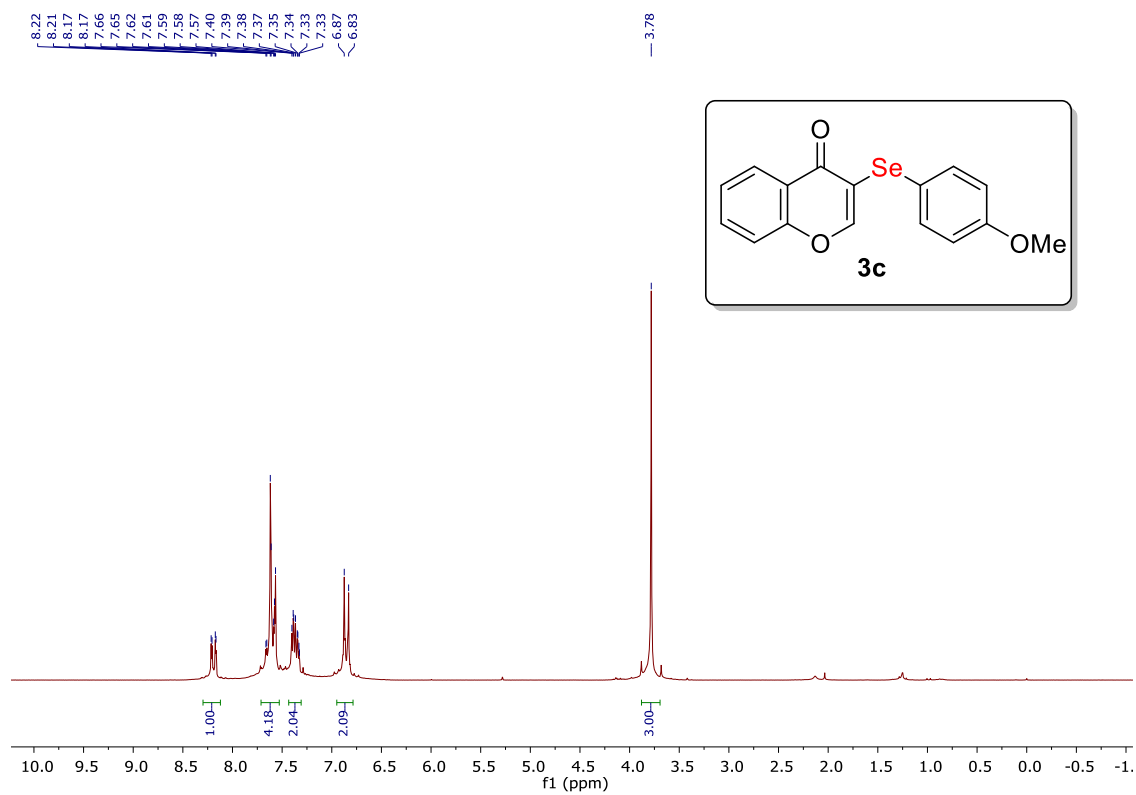Figure S6. <sup>1</sup>H NMR (200 MHz, CDCl<sub>3</sub>) spectrum of **3c**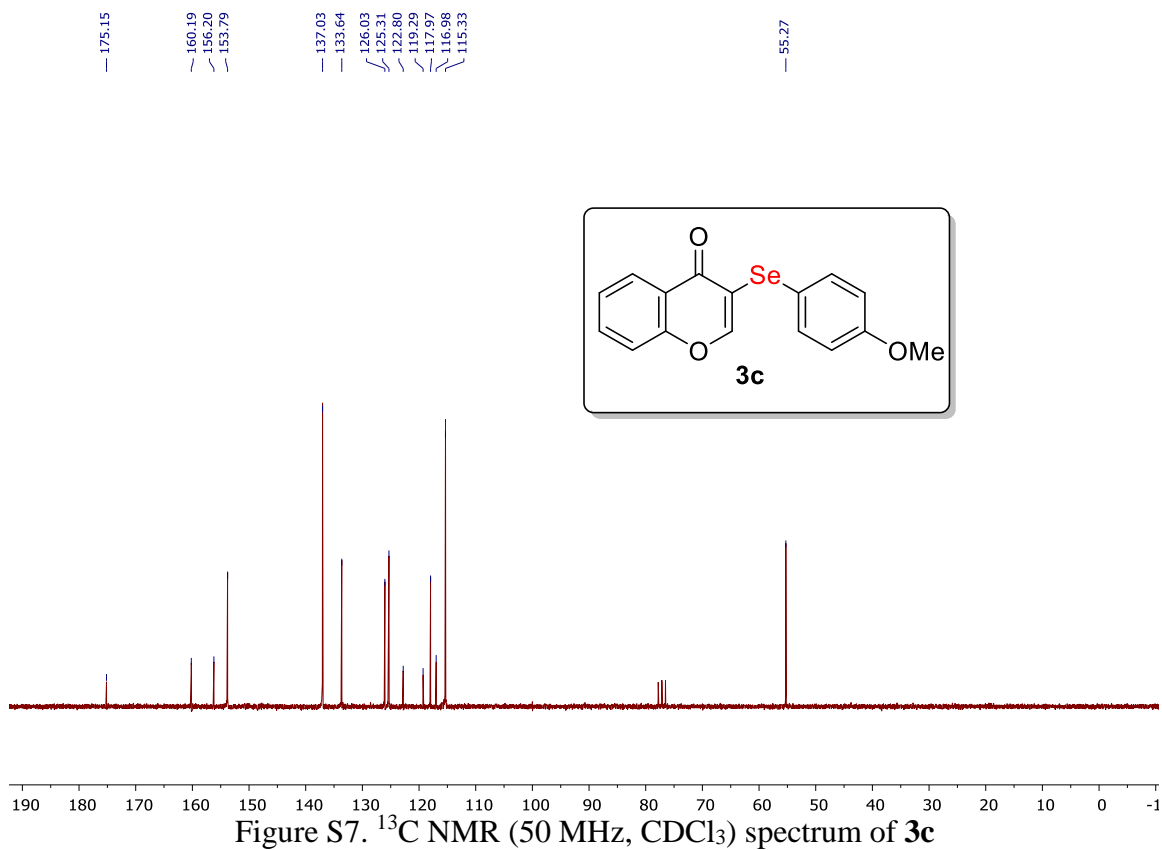Figure S7. <sup>13</sup>C NMR (50 MHz, CDCl<sub>3</sub>) spectrum of **3c**

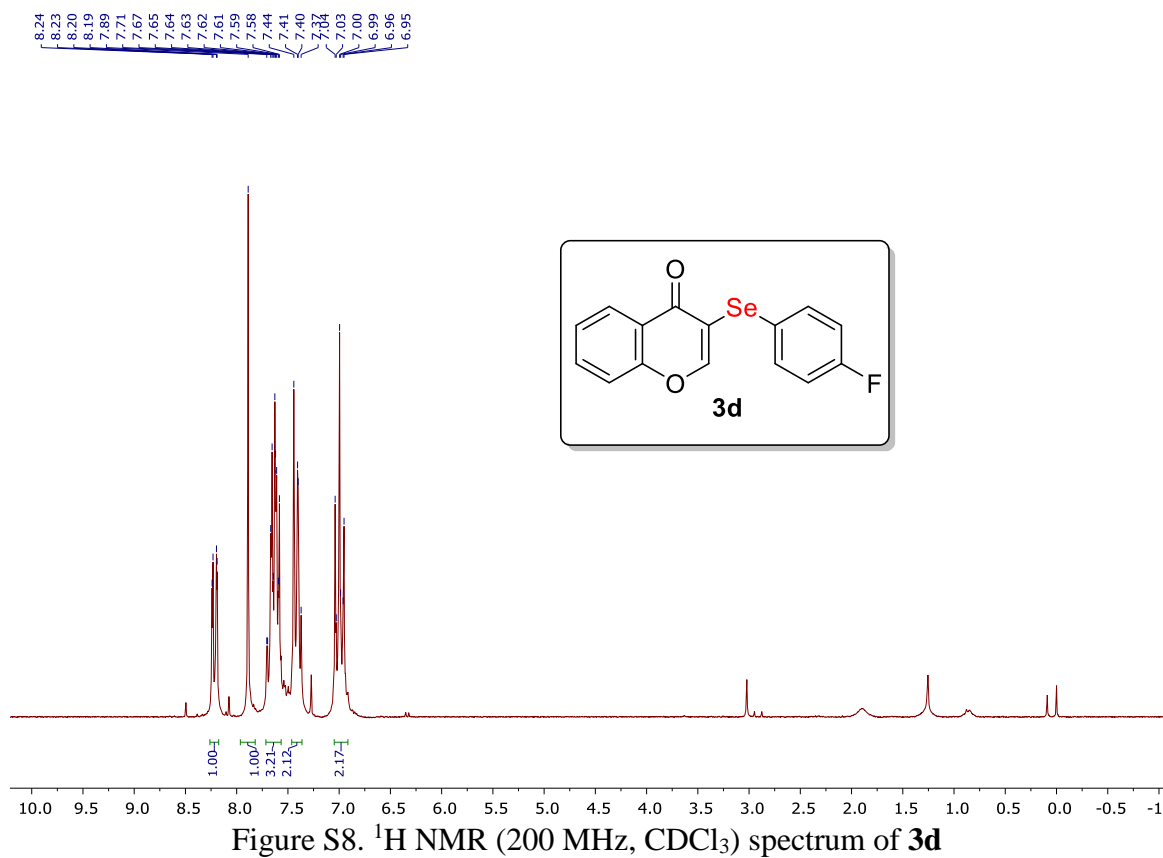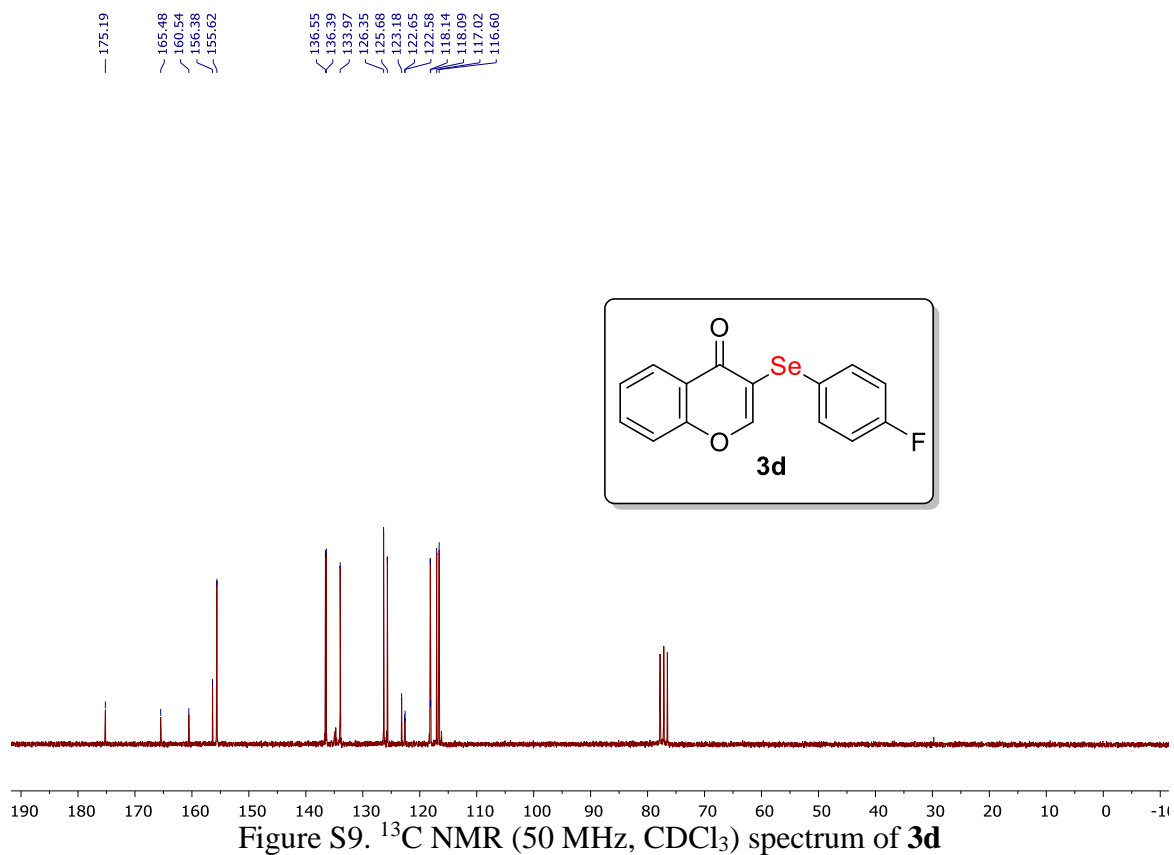

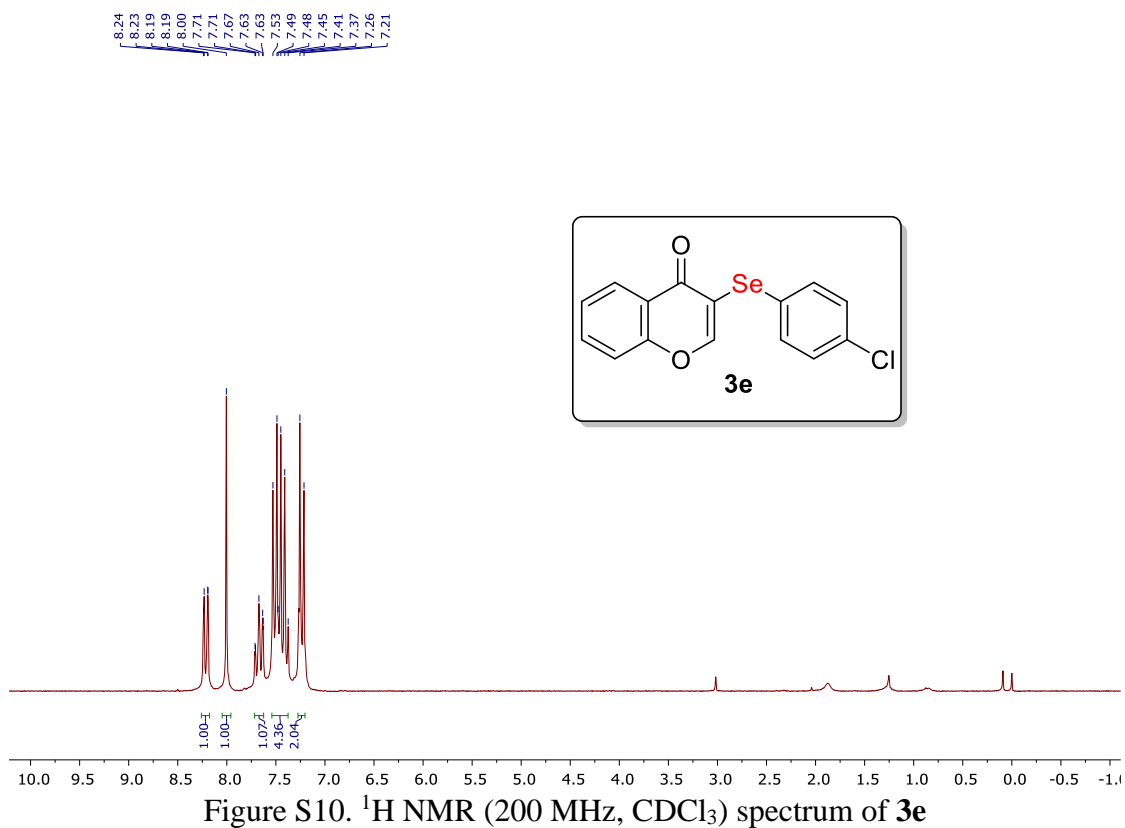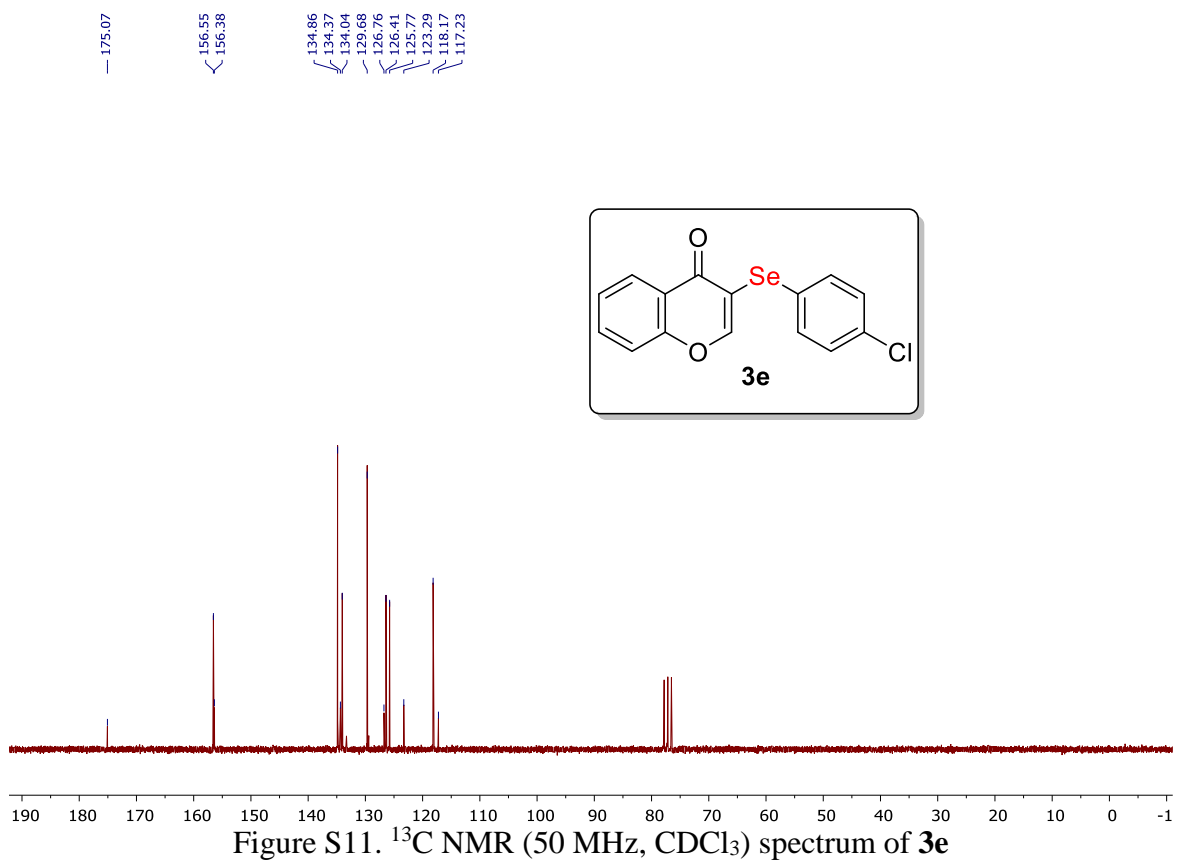

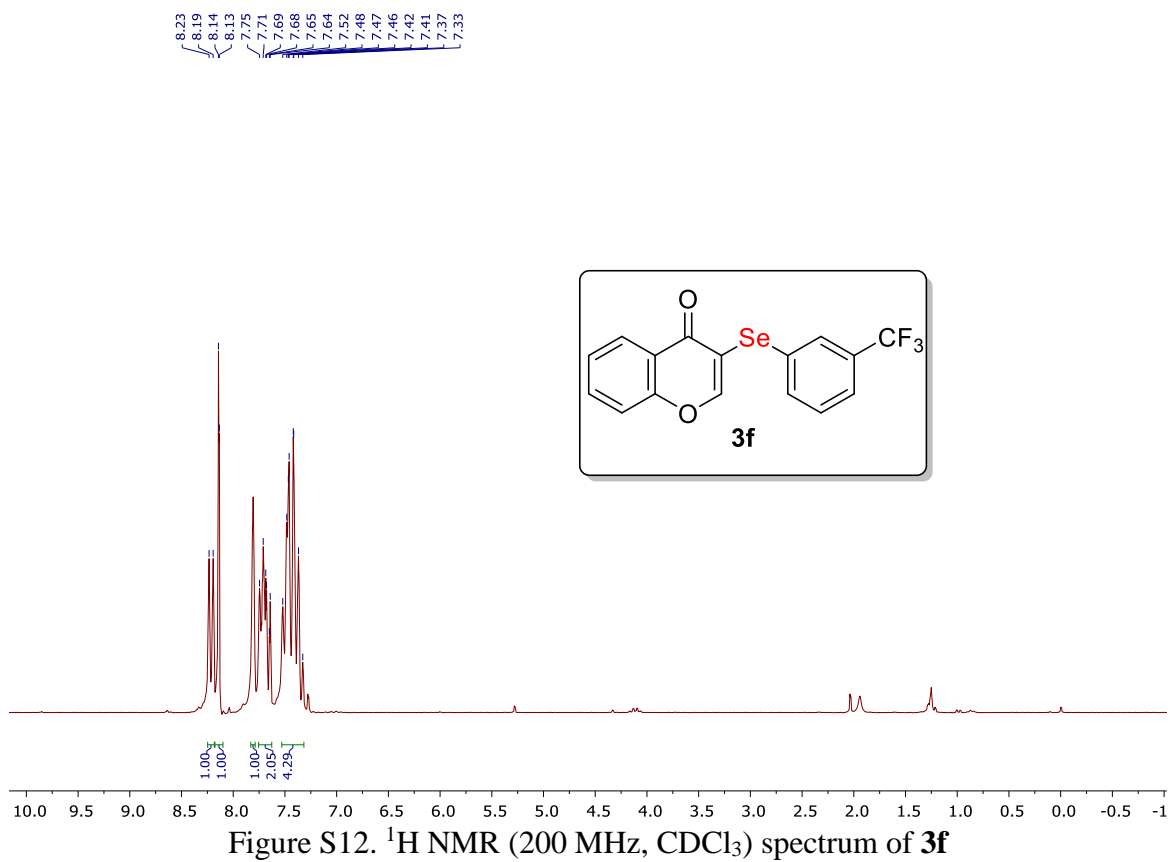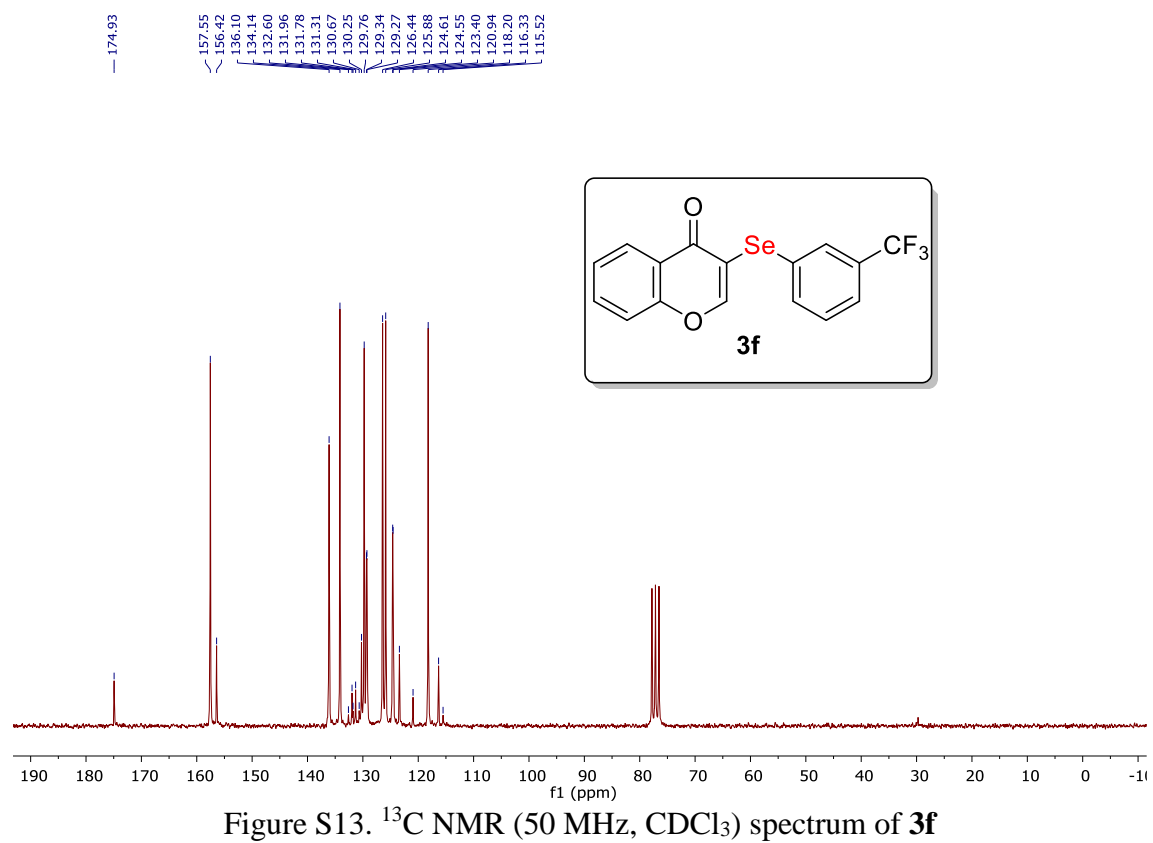



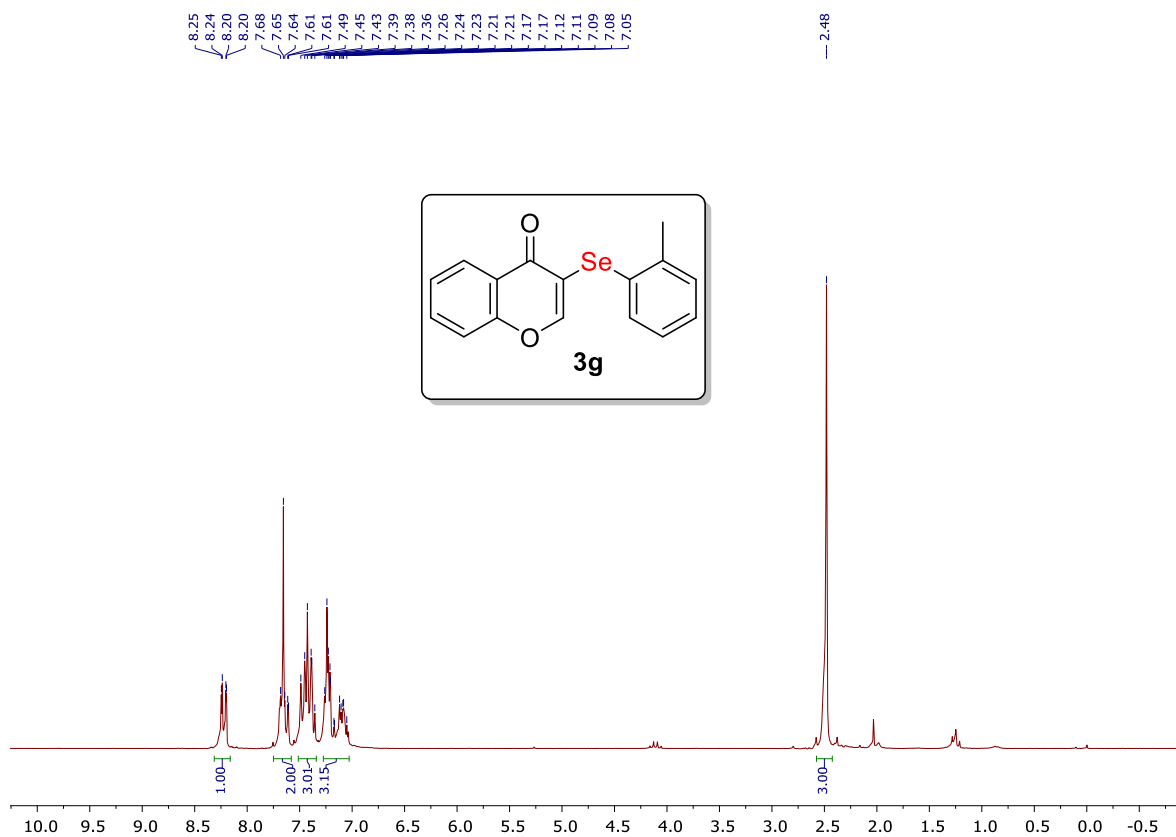Figure S14. <sup>1</sup>H NMR (200 MHz, CDCl<sub>3</sub>) spectrum of **3g**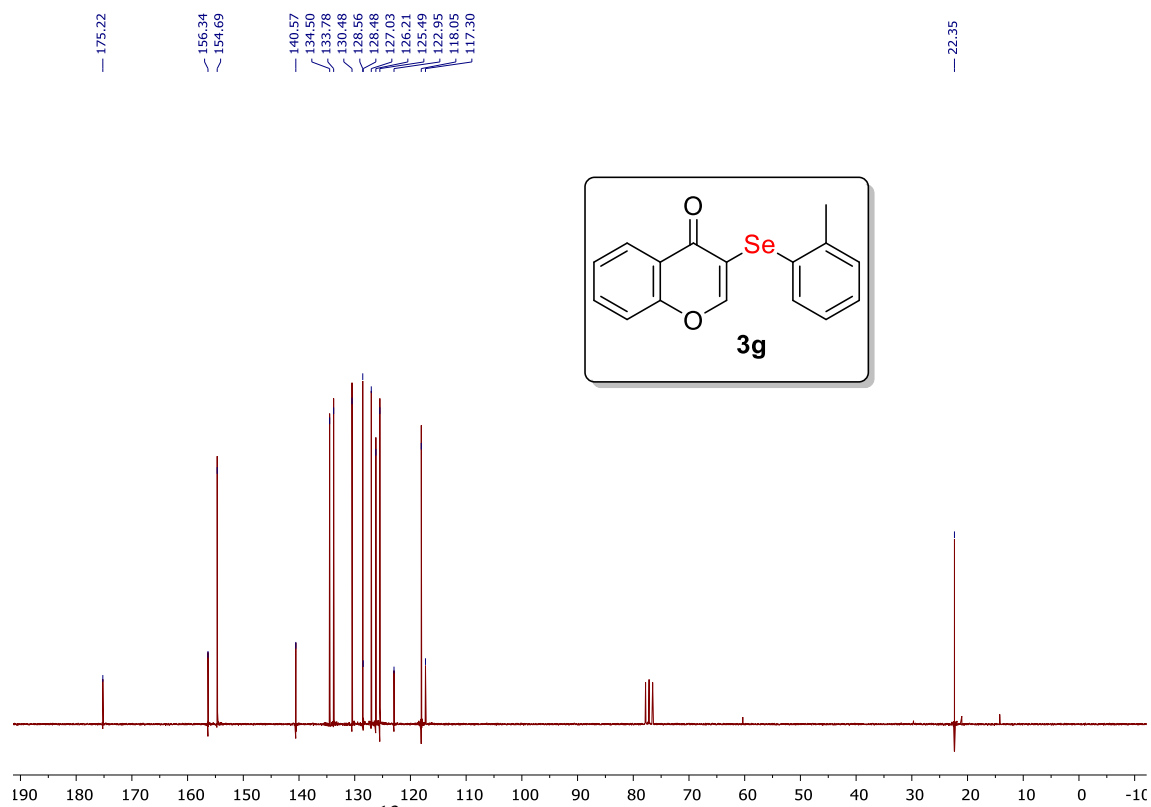Figure S15. <sup>13</sup>C NMR (50 MHz, CDCl<sub>3</sub>) spectrum of **3g**

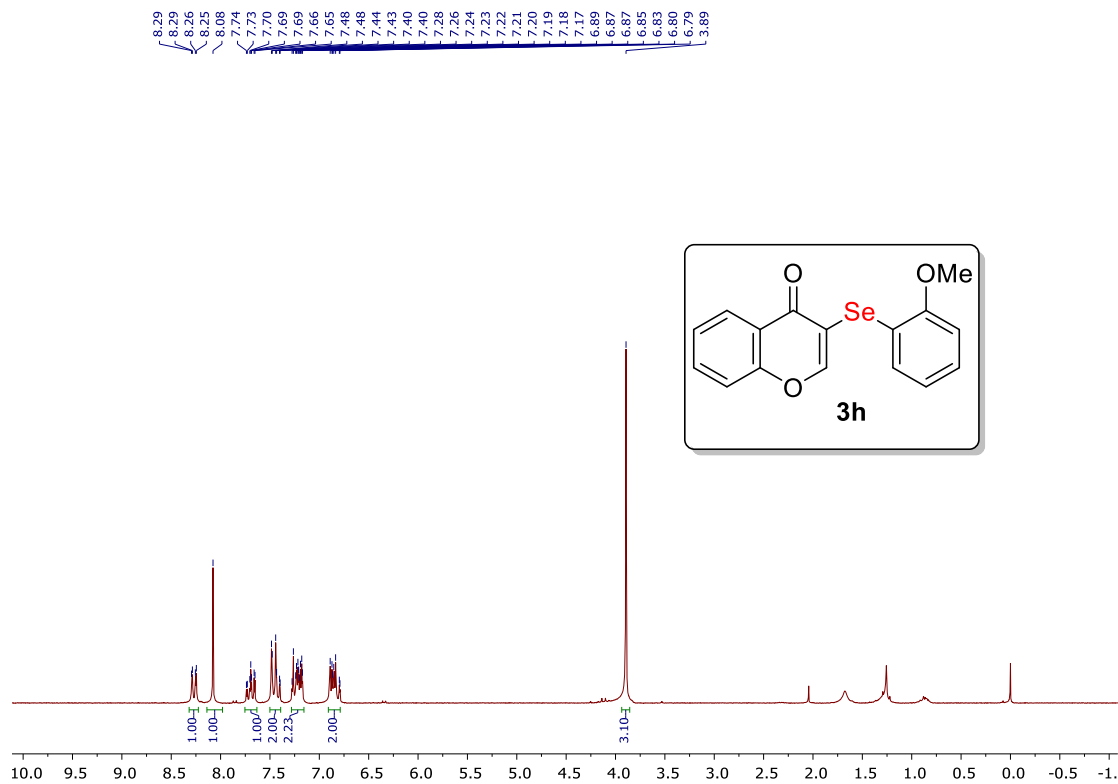Figure S16. <sup>1</sup>H NMR (200 MHz, CDCl<sub>3</sub>) spectrum of **3h**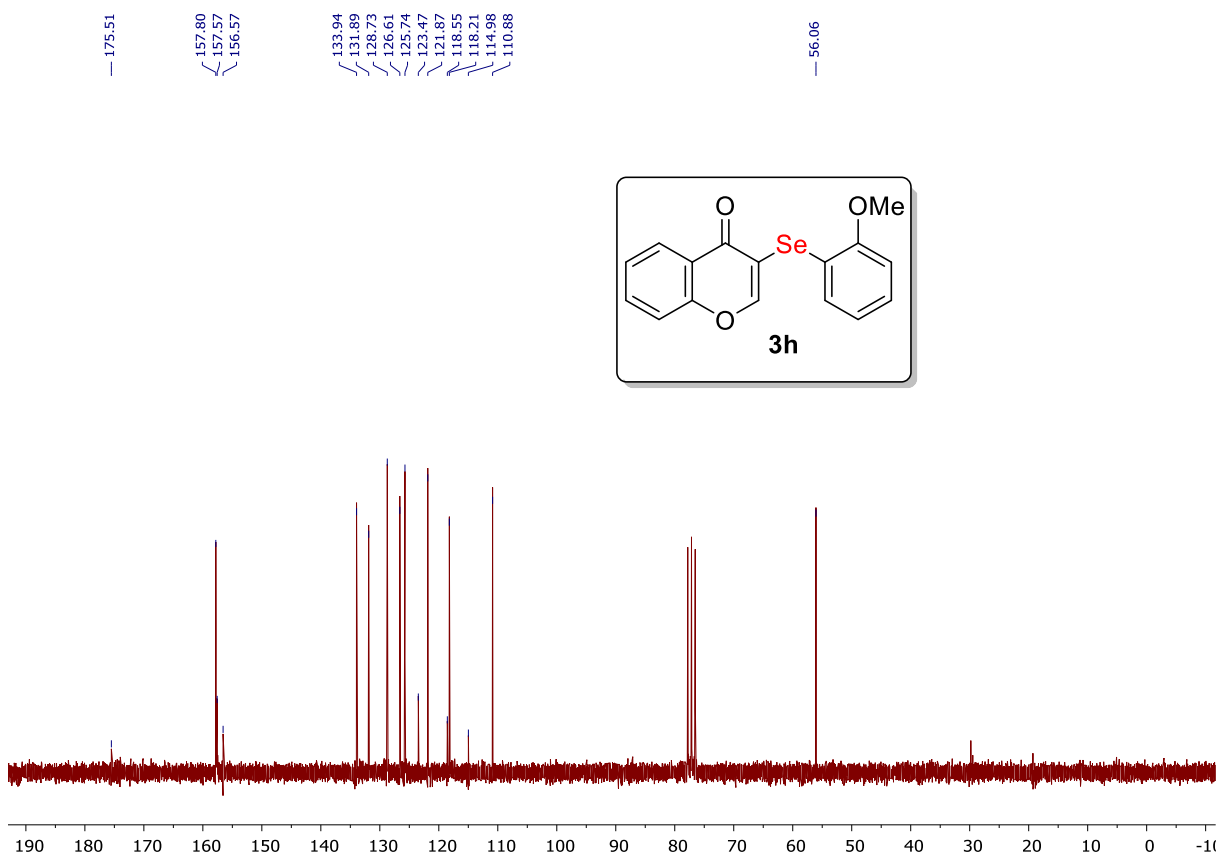Figure S17. <sup>13</sup>C NMR (50 MHz, CDCl<sub>3</sub>) spectrum of **3h**

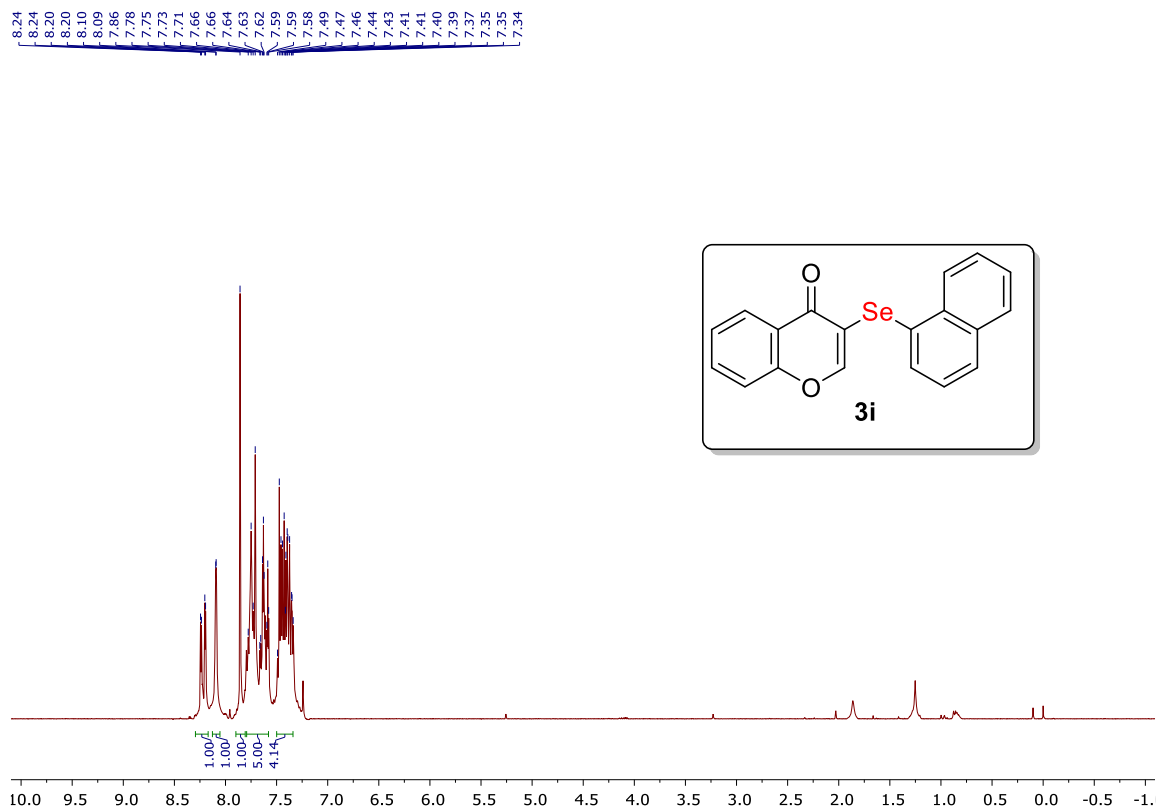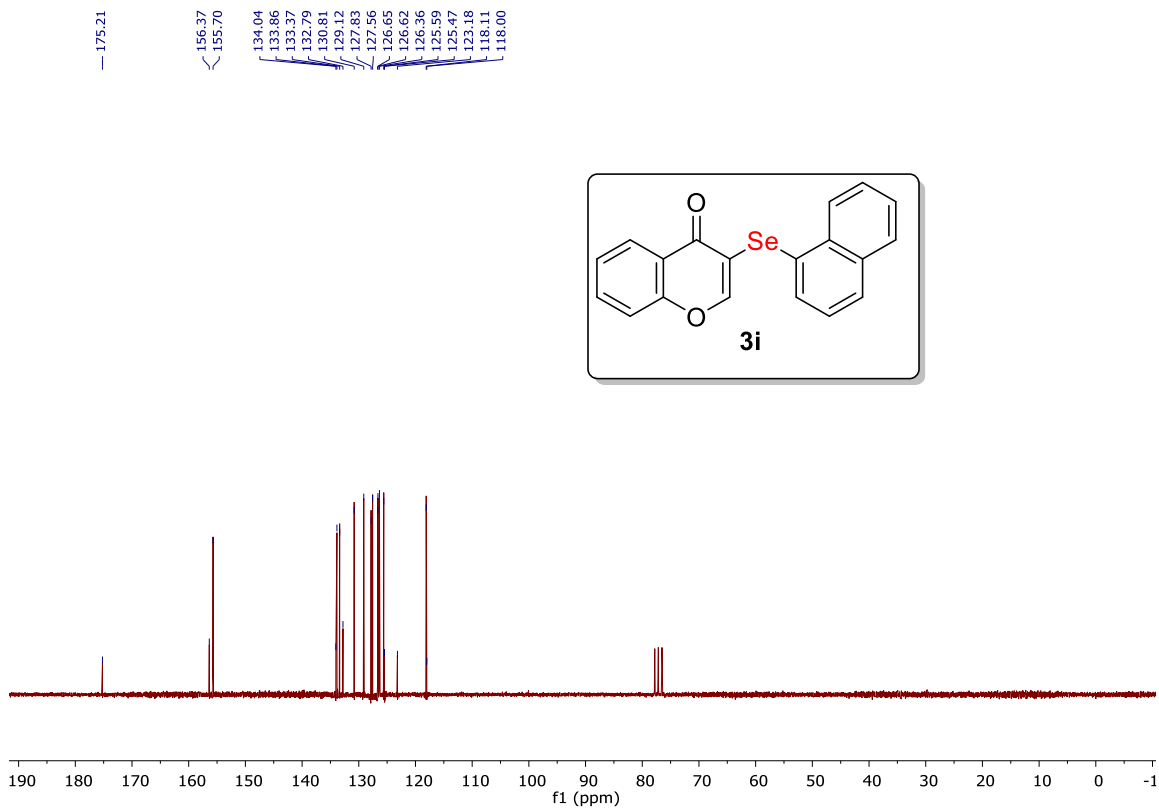

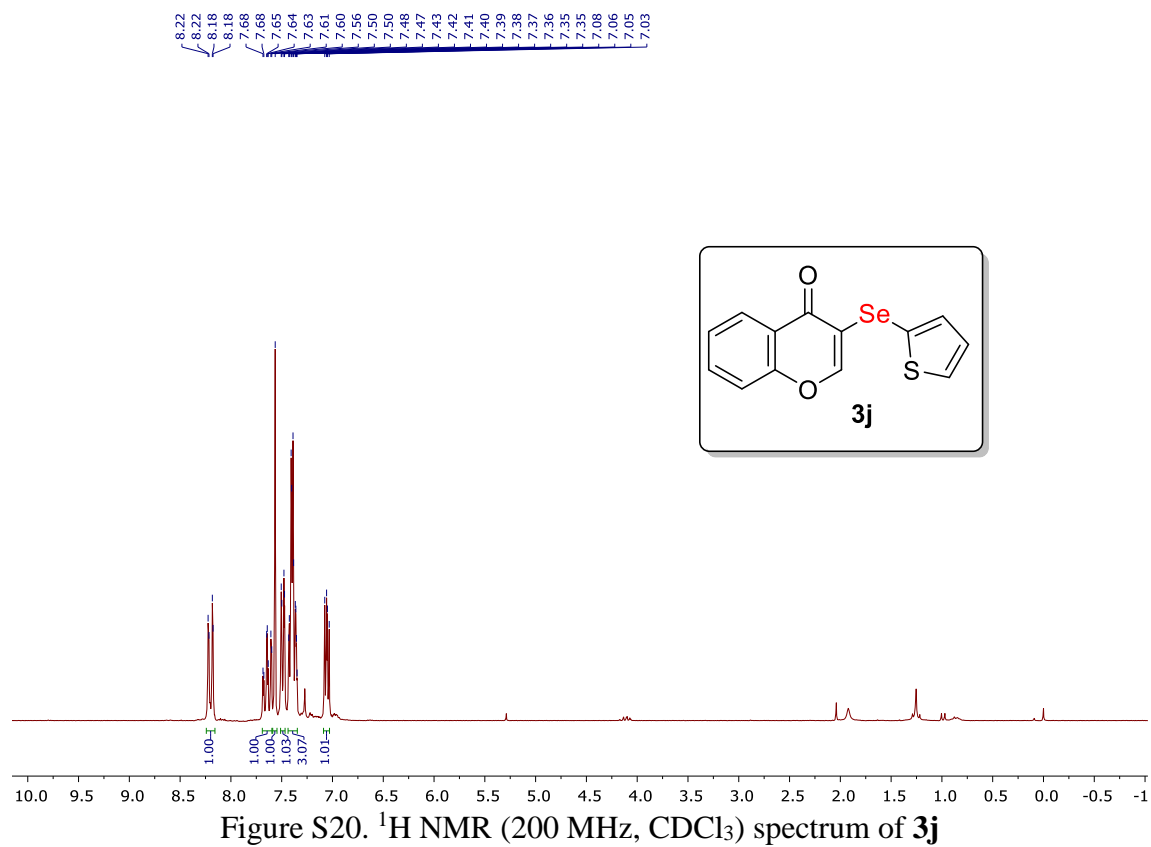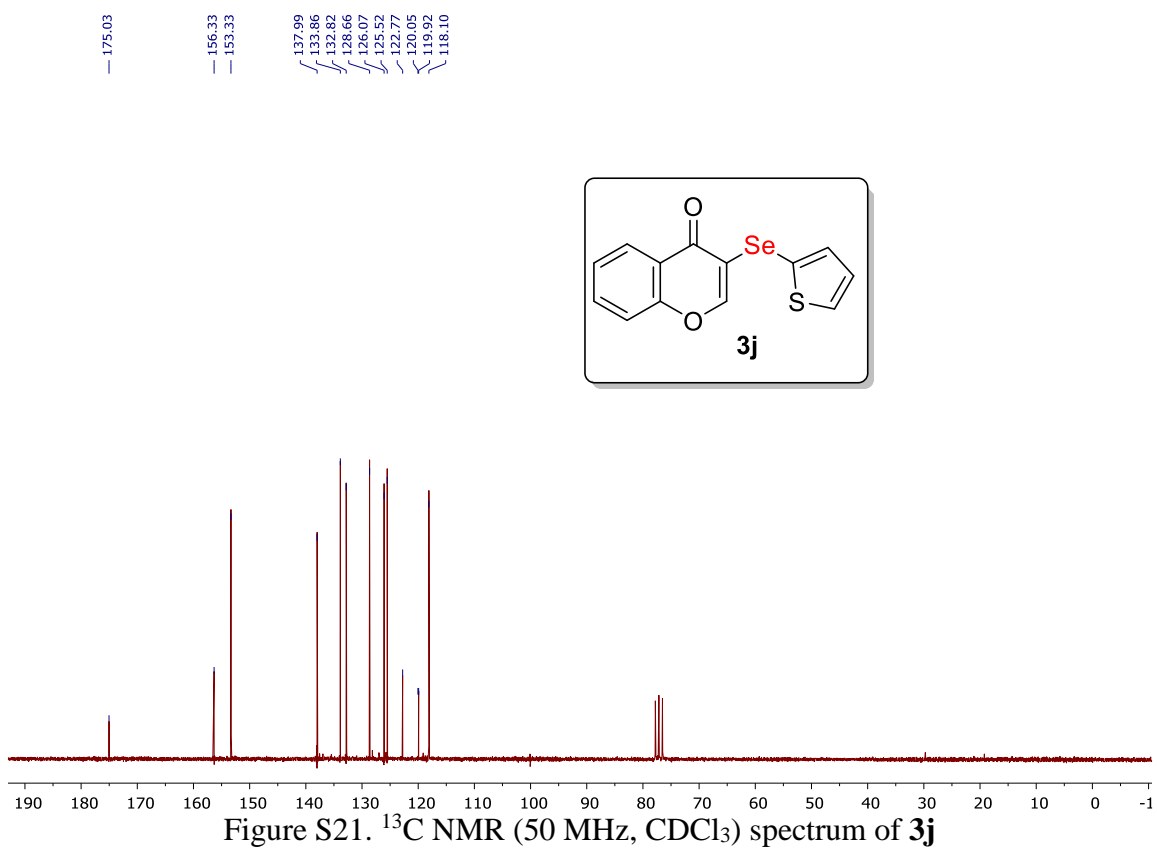

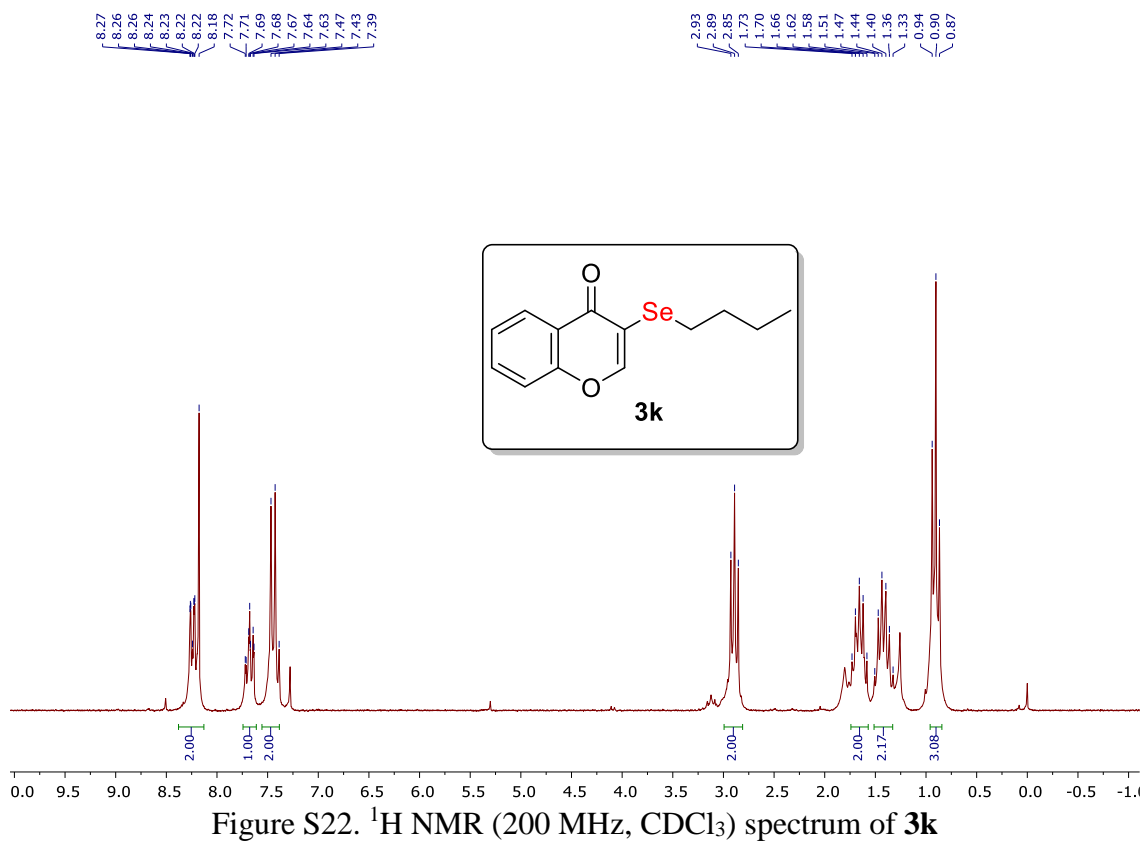Figure S22. <sup>1</sup>H NMR (200 MHz, CDCl<sub>3</sub>) spectrum of **3k**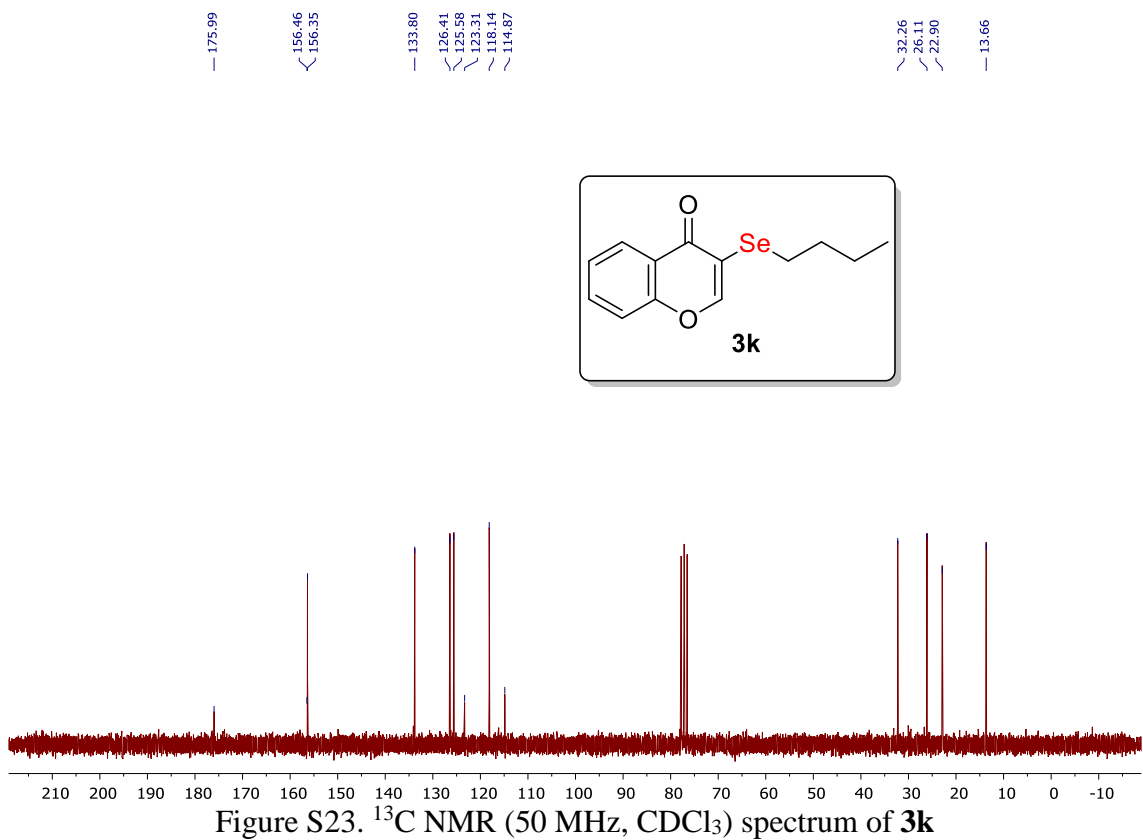Figure S23. <sup>13</sup>C NMR (50 MHz, CDCl<sub>3</sub>) spectrum of **3k**

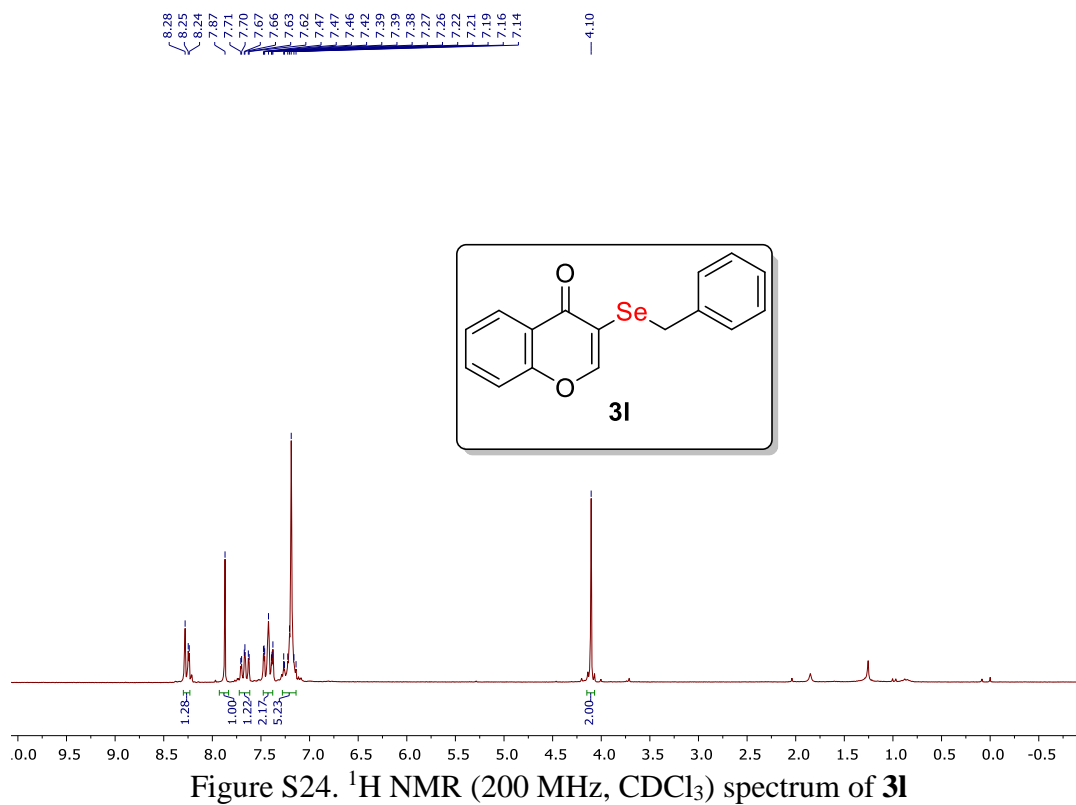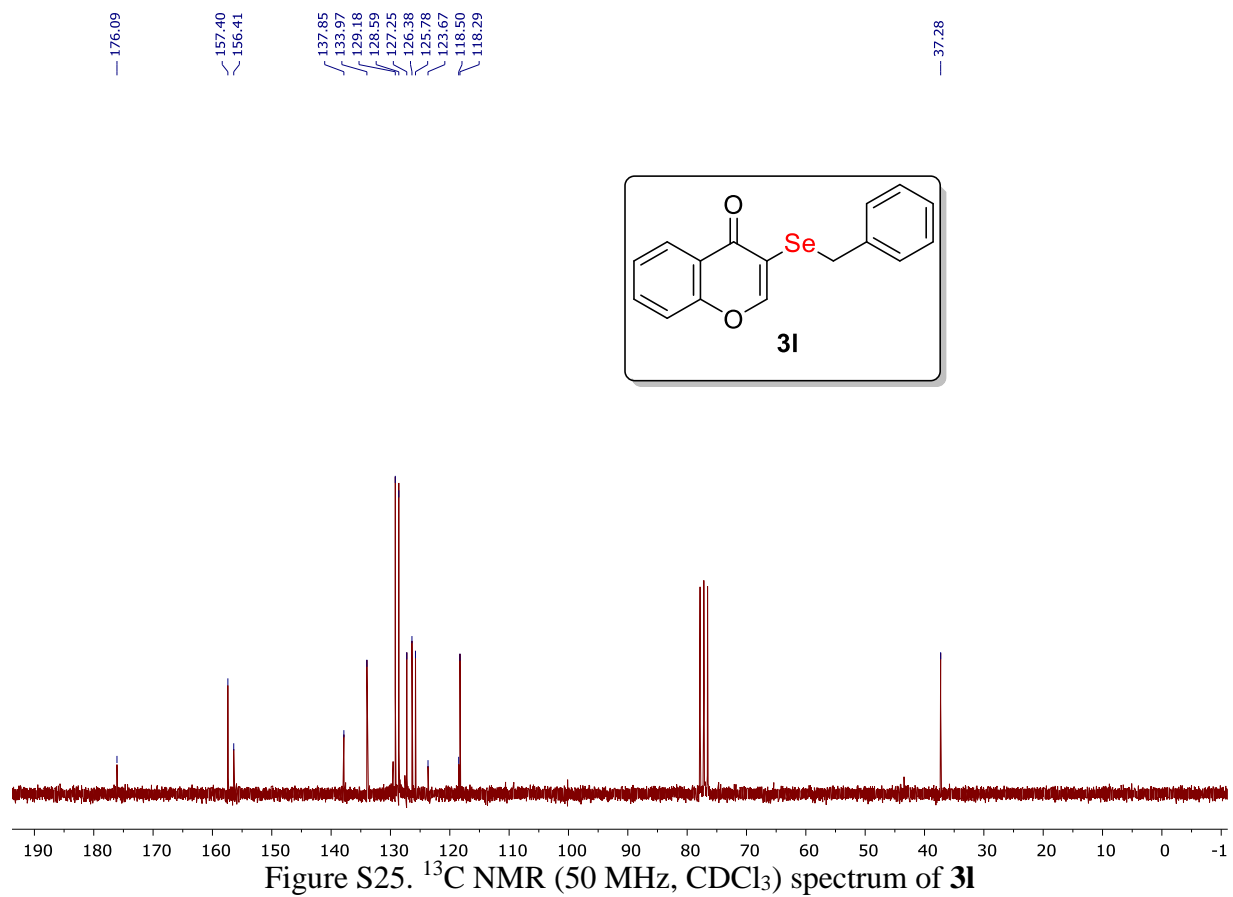

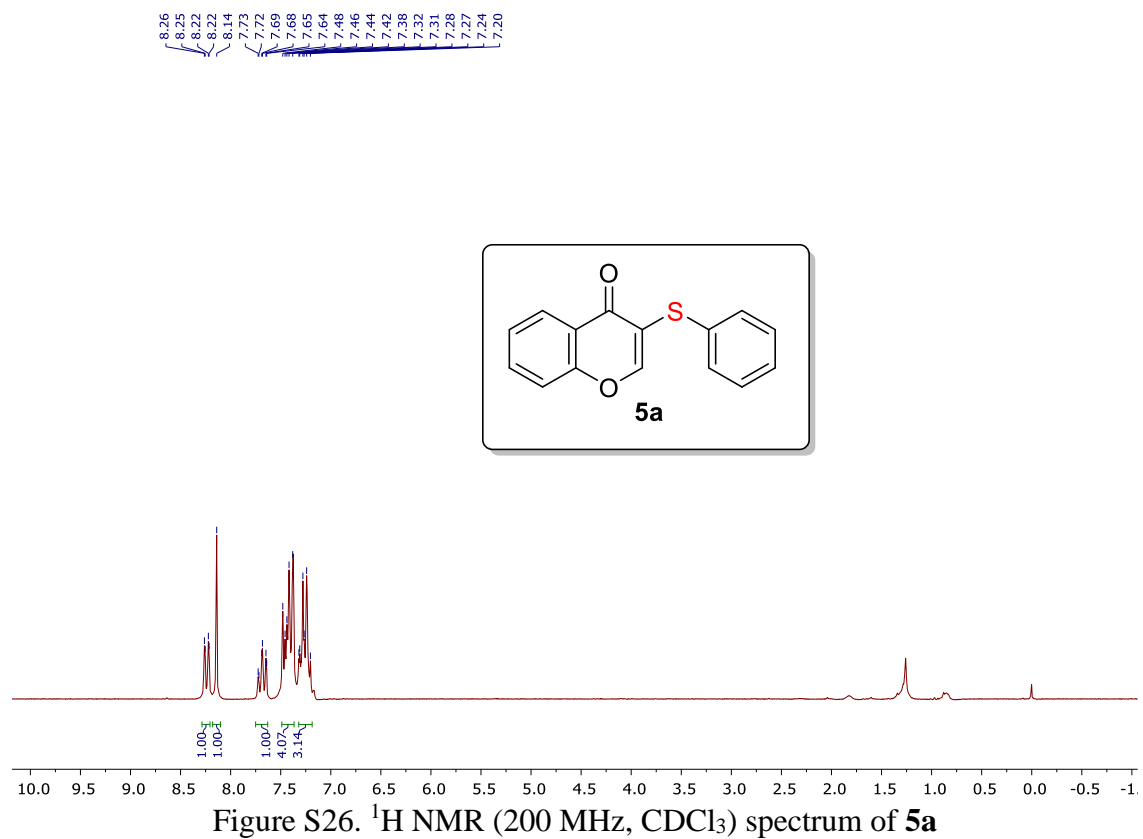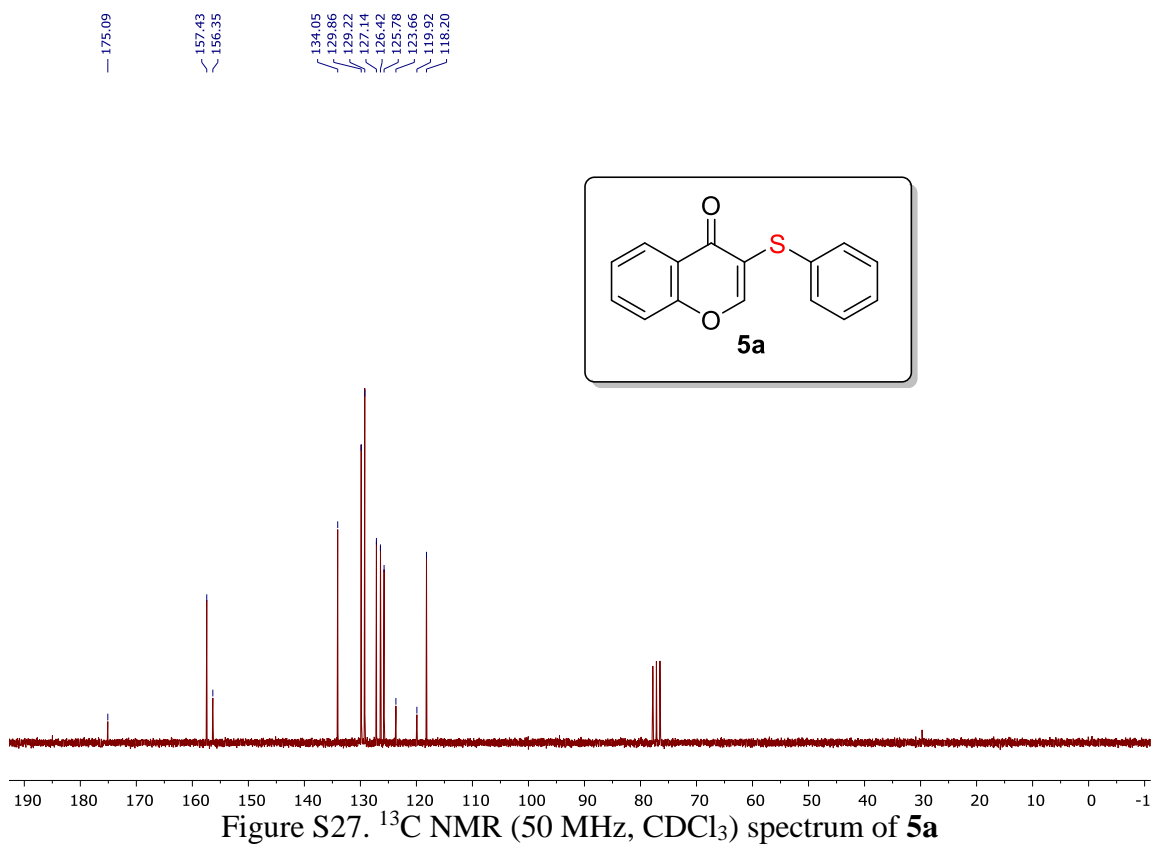

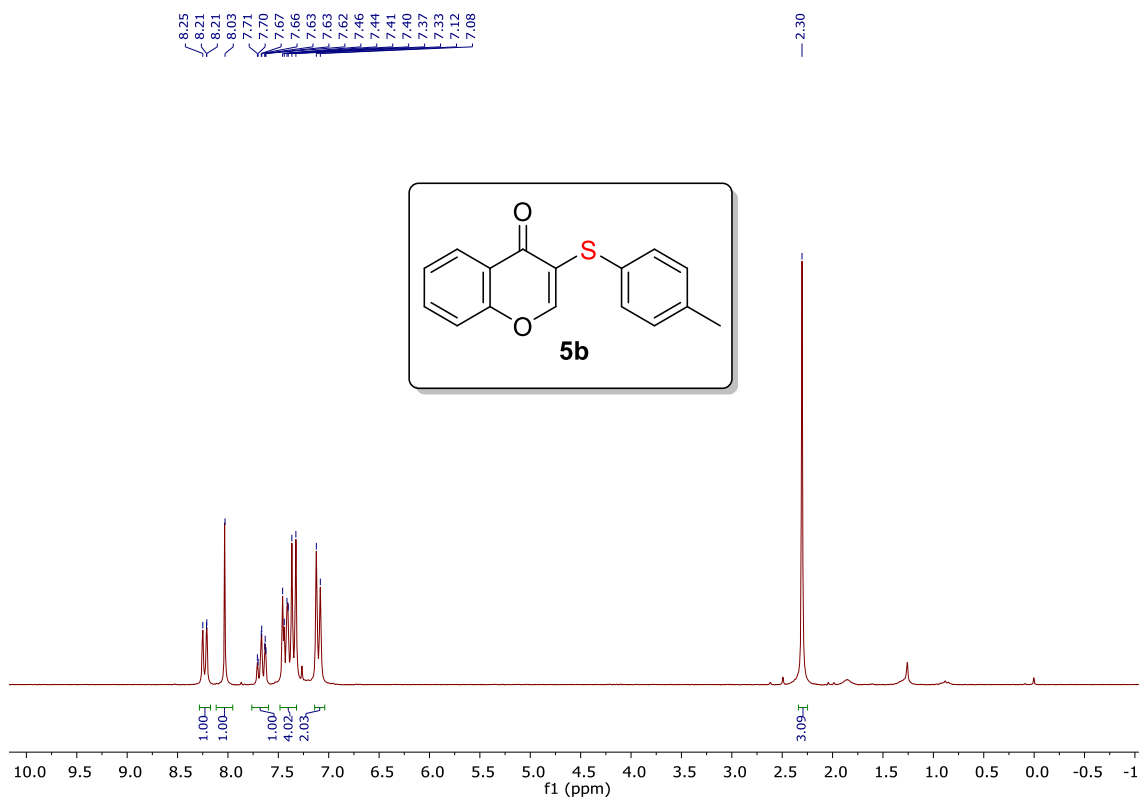Figure S28. <sup>1</sup>H NMR (200 MHz, CDCl<sub>3</sub>) spectrum of **5b**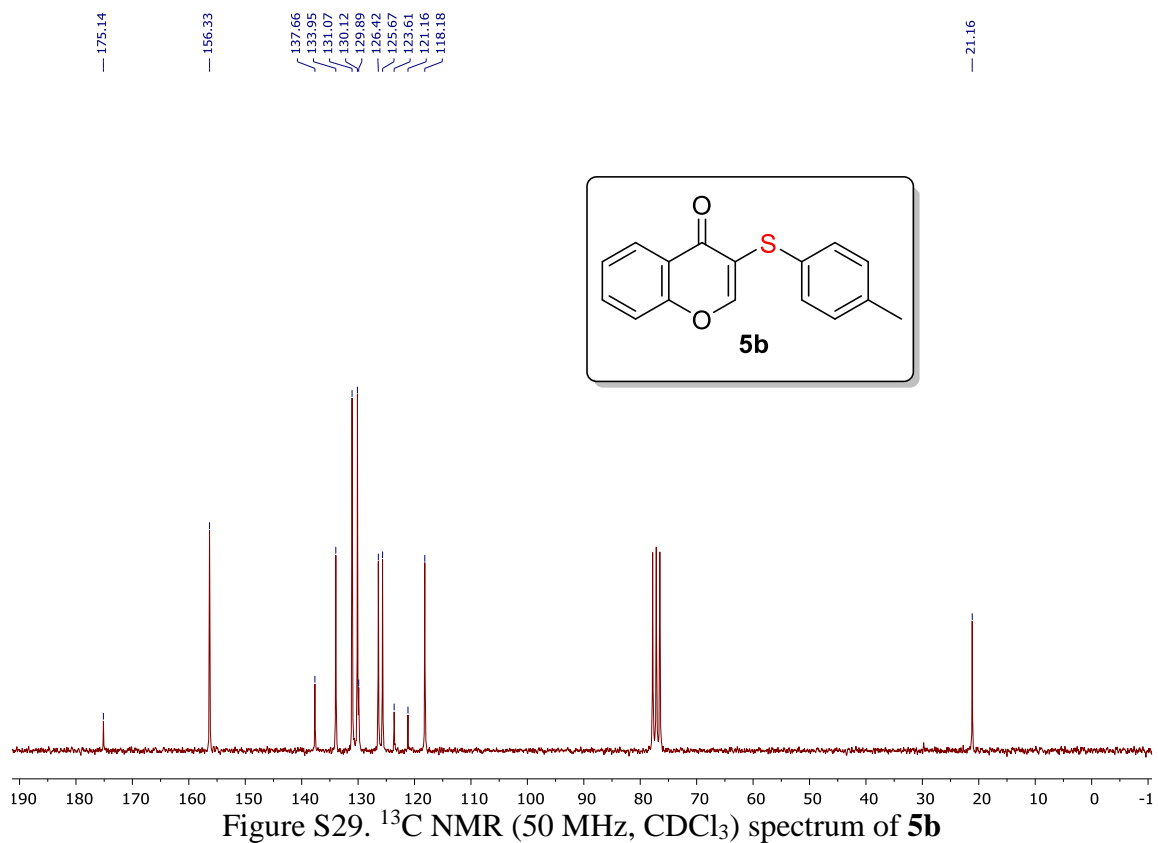Figure S29. <sup>13</sup>C NMR (50 MHz, CDCl<sub>3</sub>) spectrum of **5b**



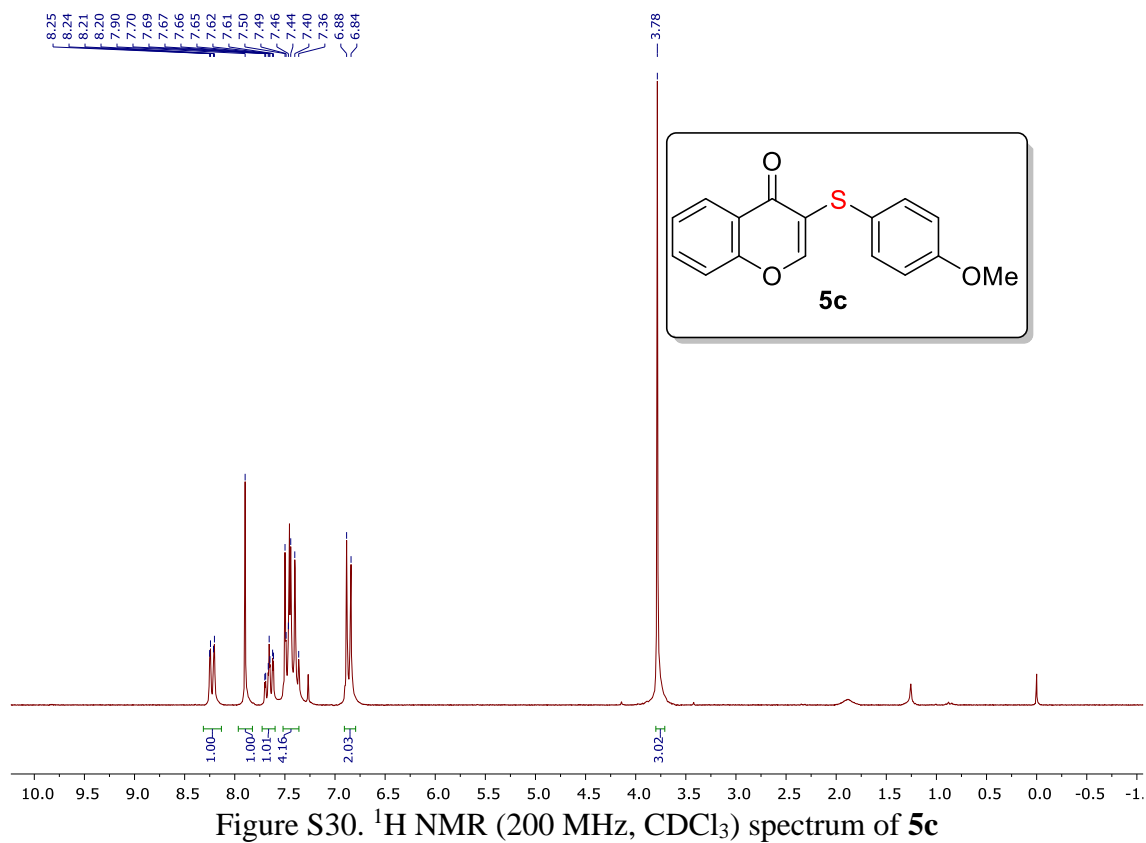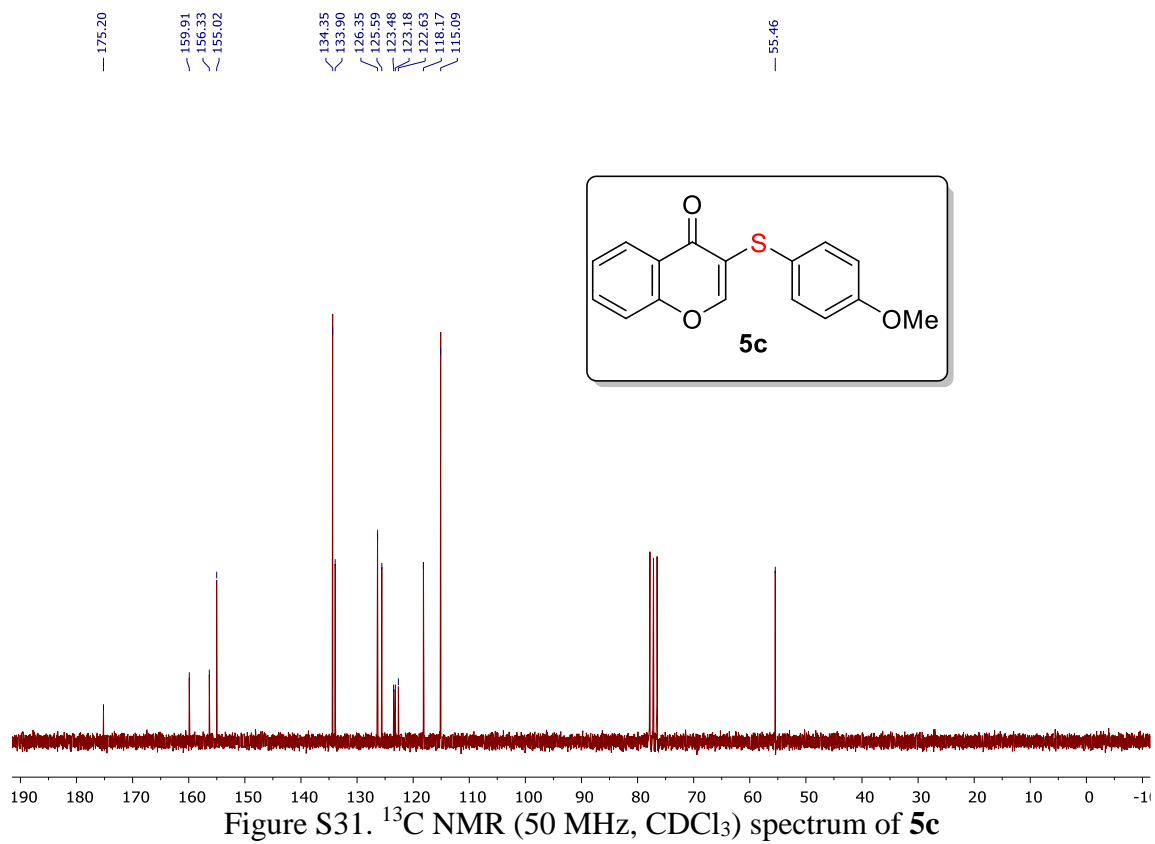

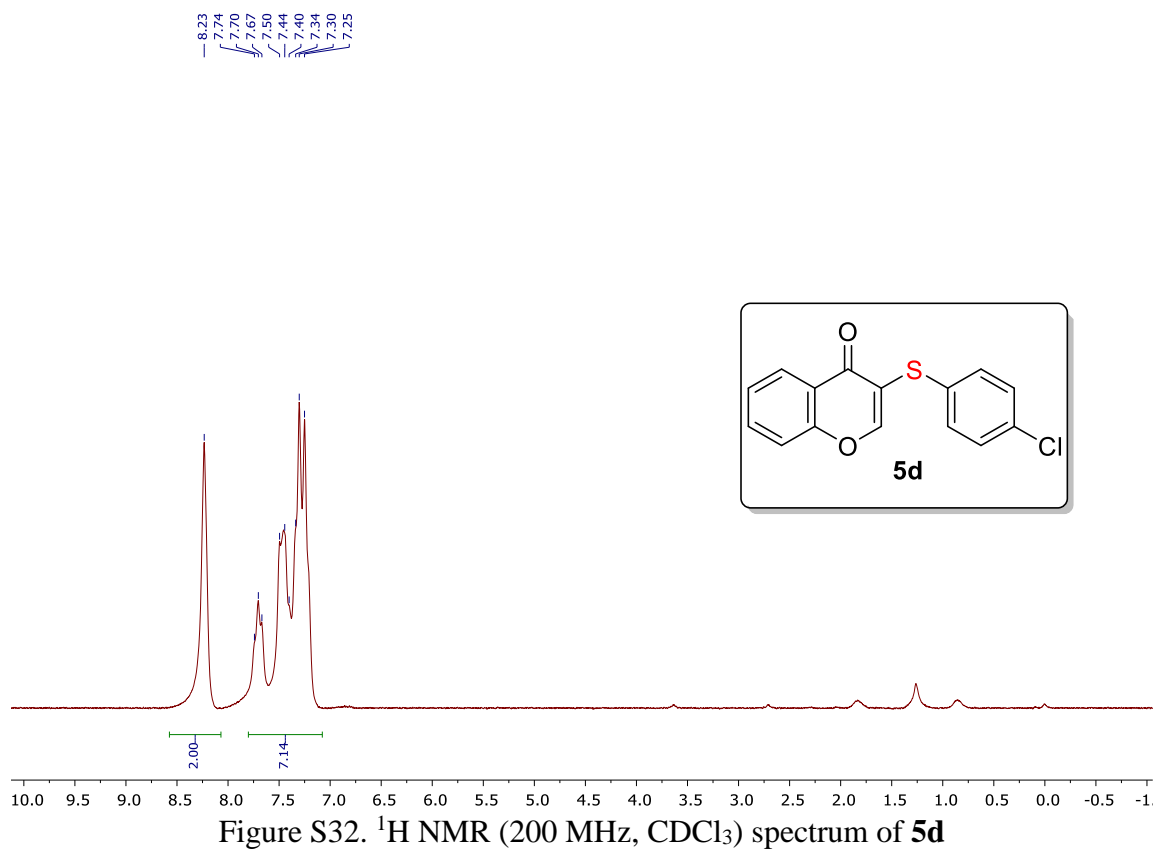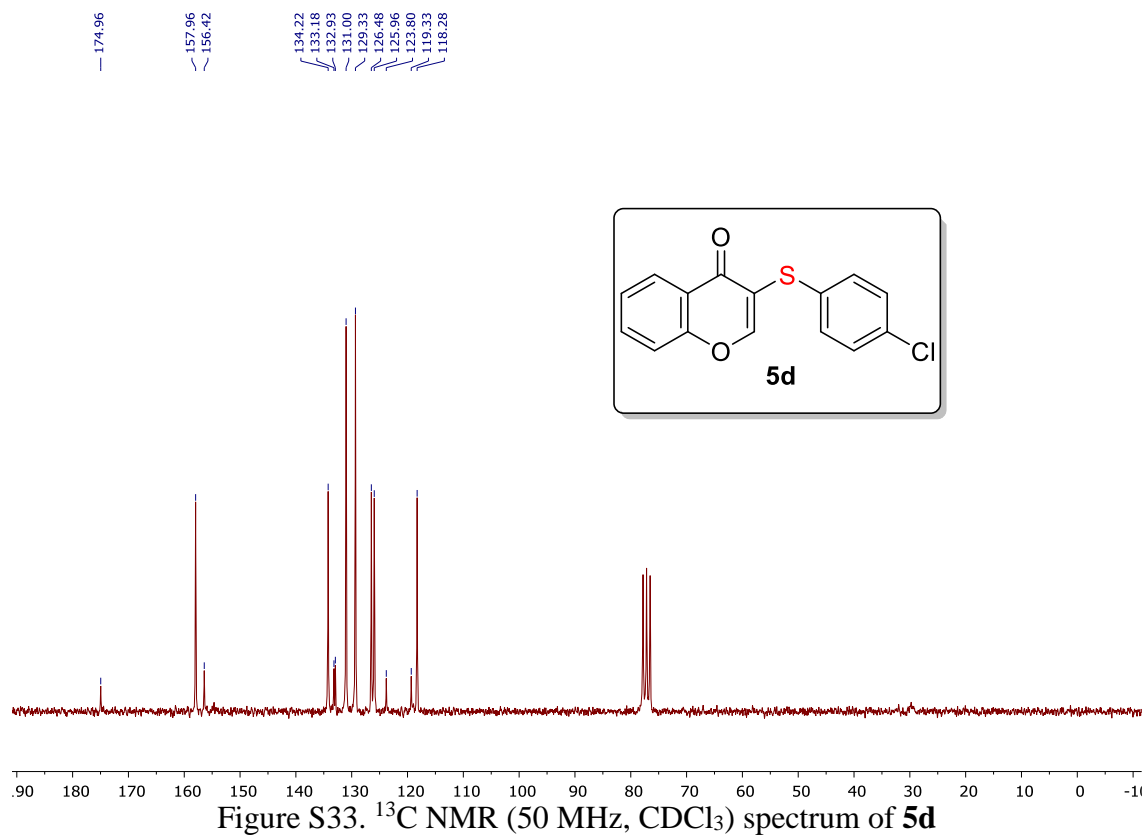

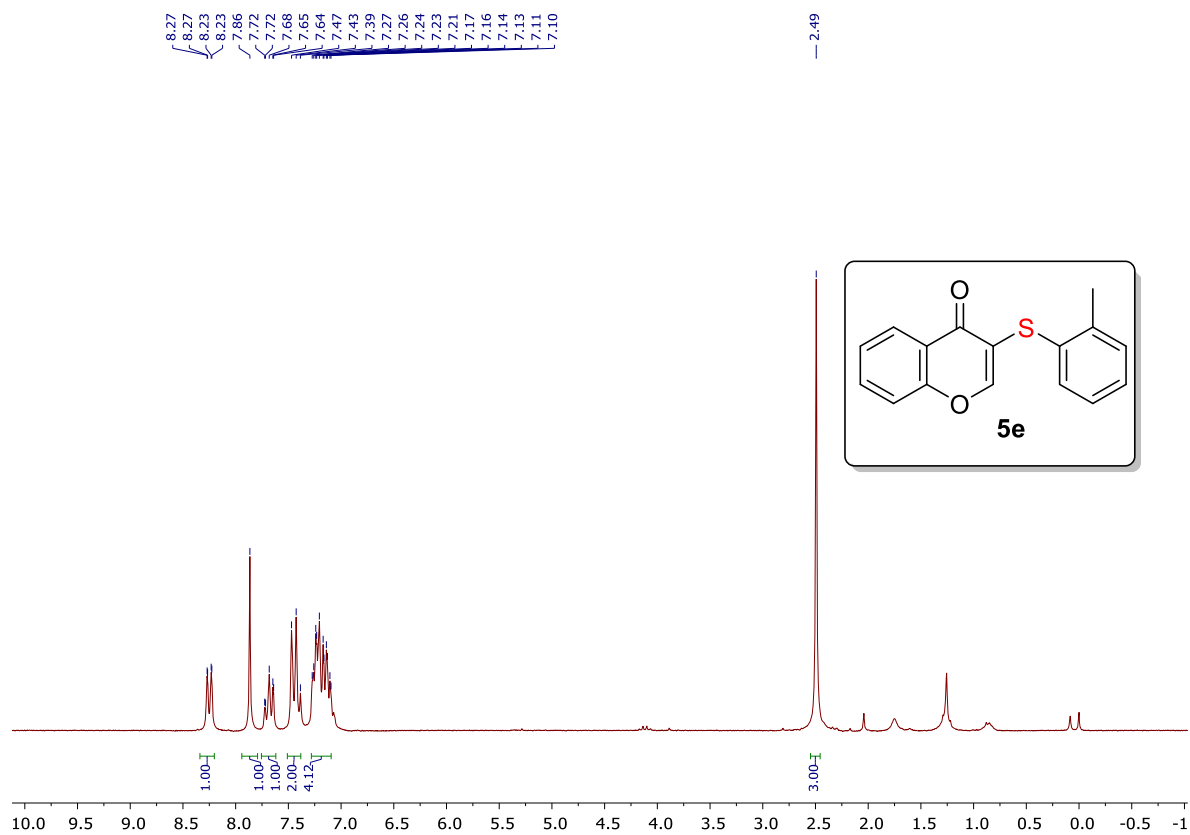Figure S34. <sup>1</sup>H NMR (200 MHz, CDCl<sub>3</sub>) spectrum of **5e**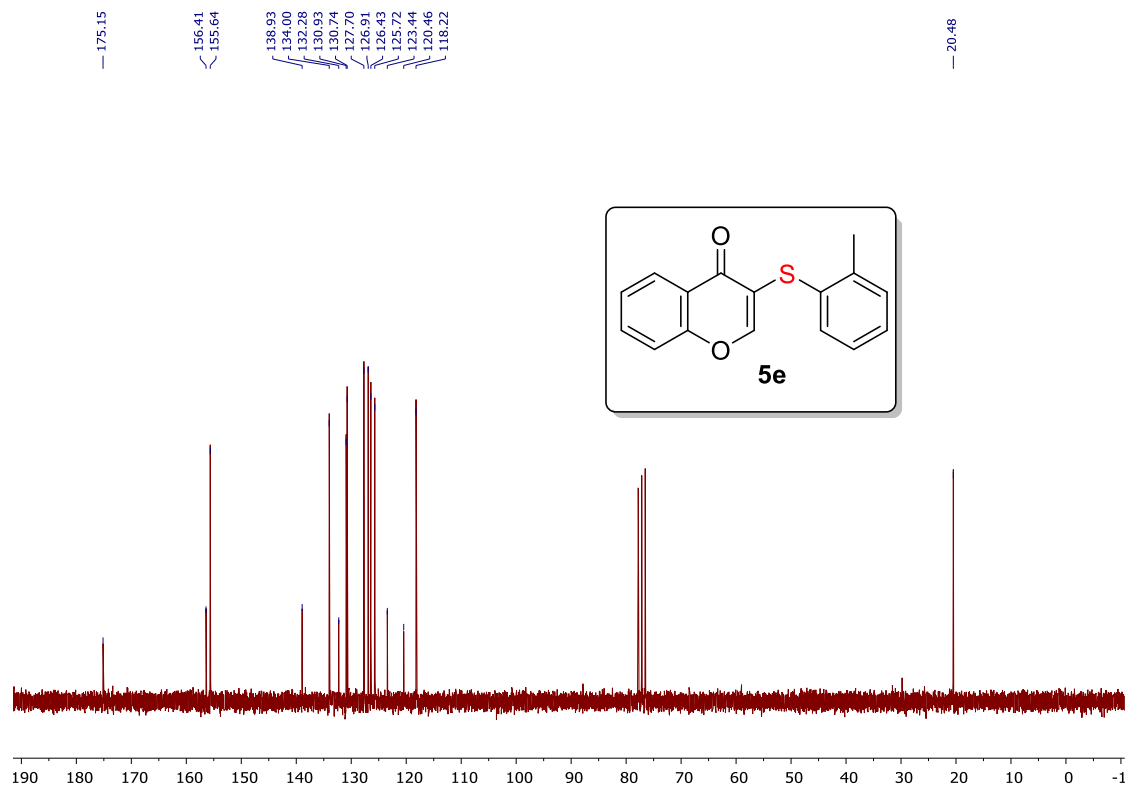Figure S35. <sup>13</sup>C NMR (50 MHz, CDCl<sub>3</sub>) spectrum of **5e**

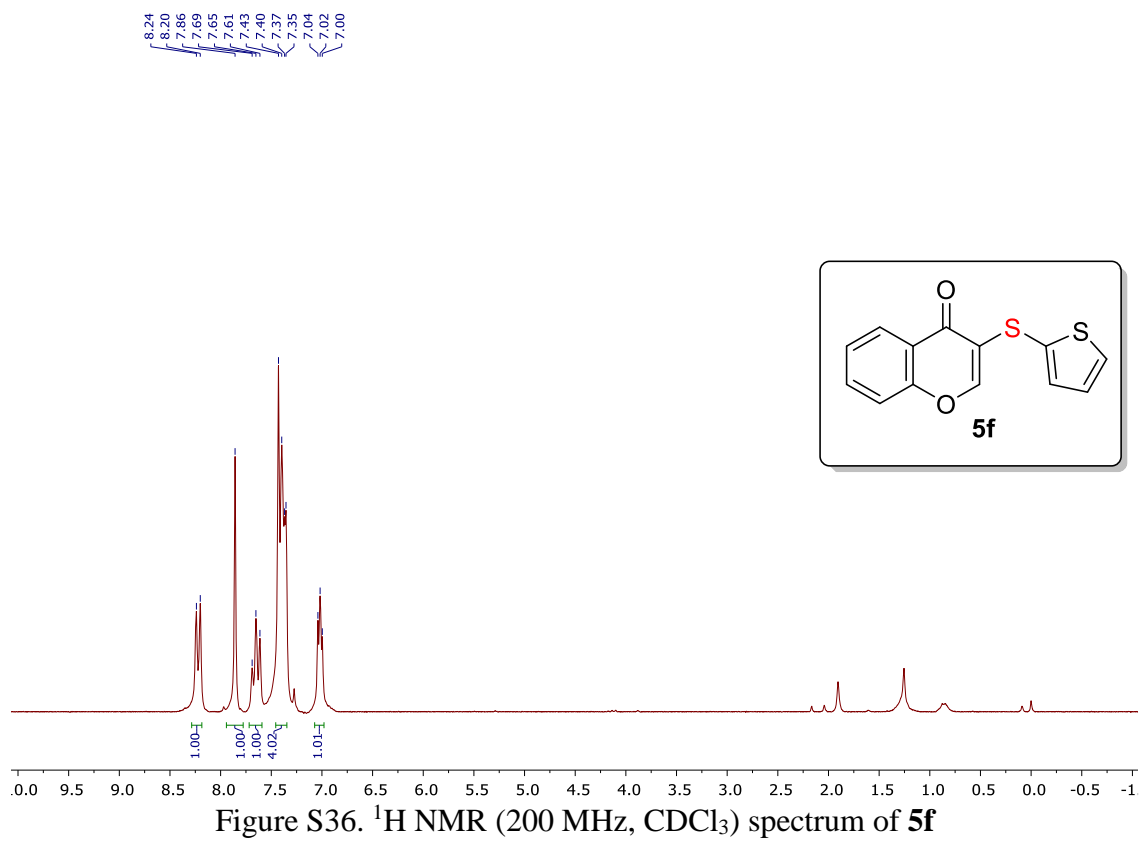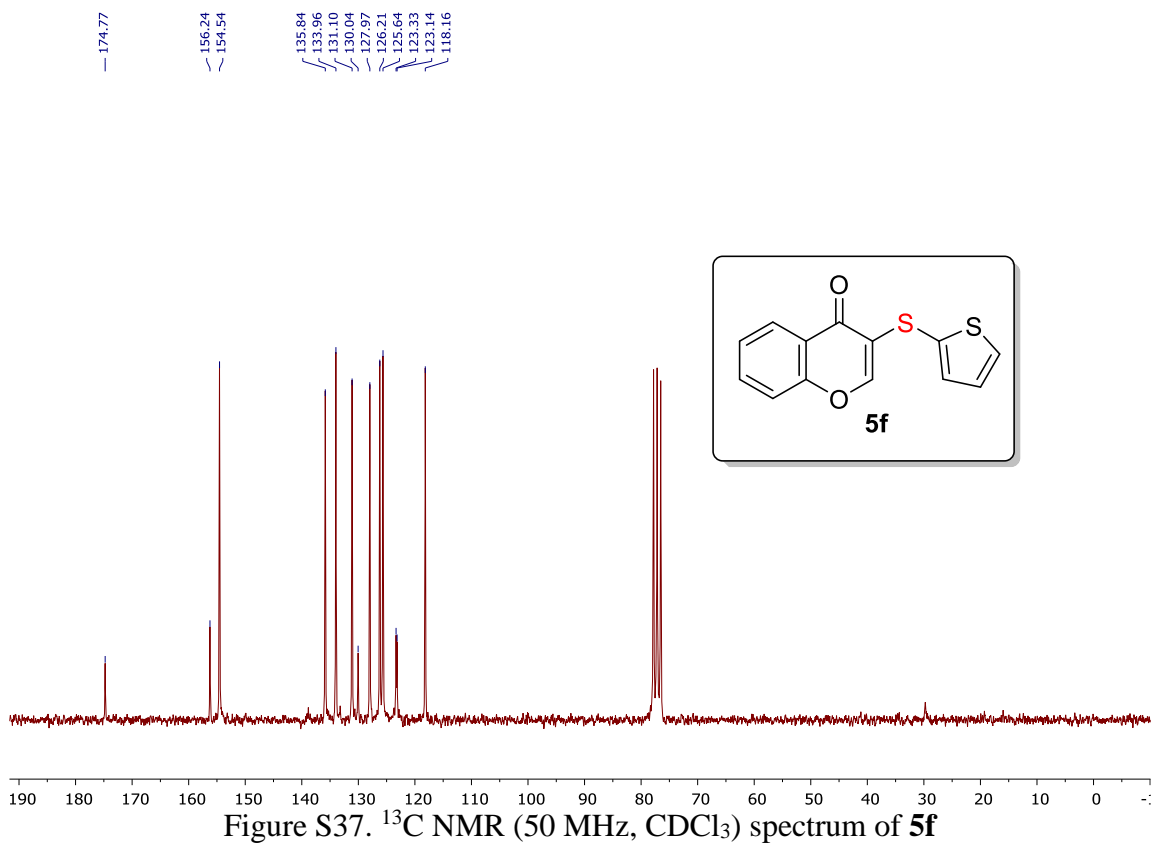

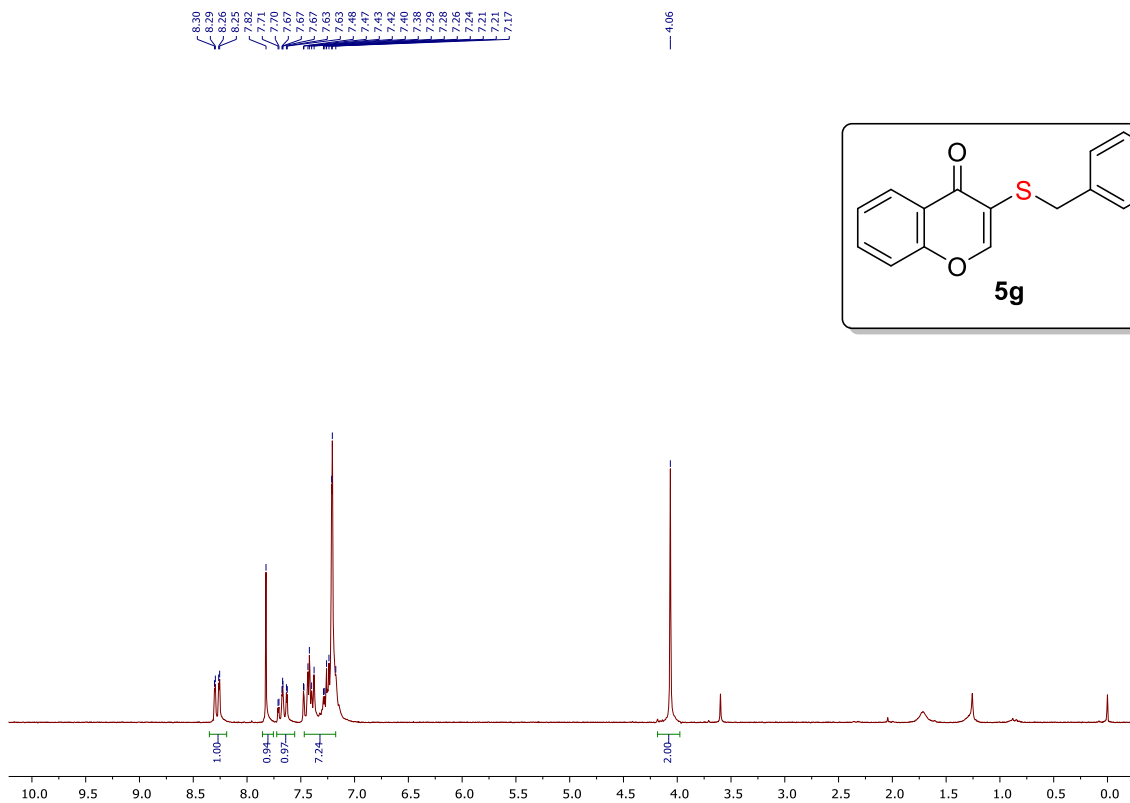Figure S38. <sup>1</sup>H NMR (200 MHz, CDCl<sub>3</sub>) spectrum of **5g**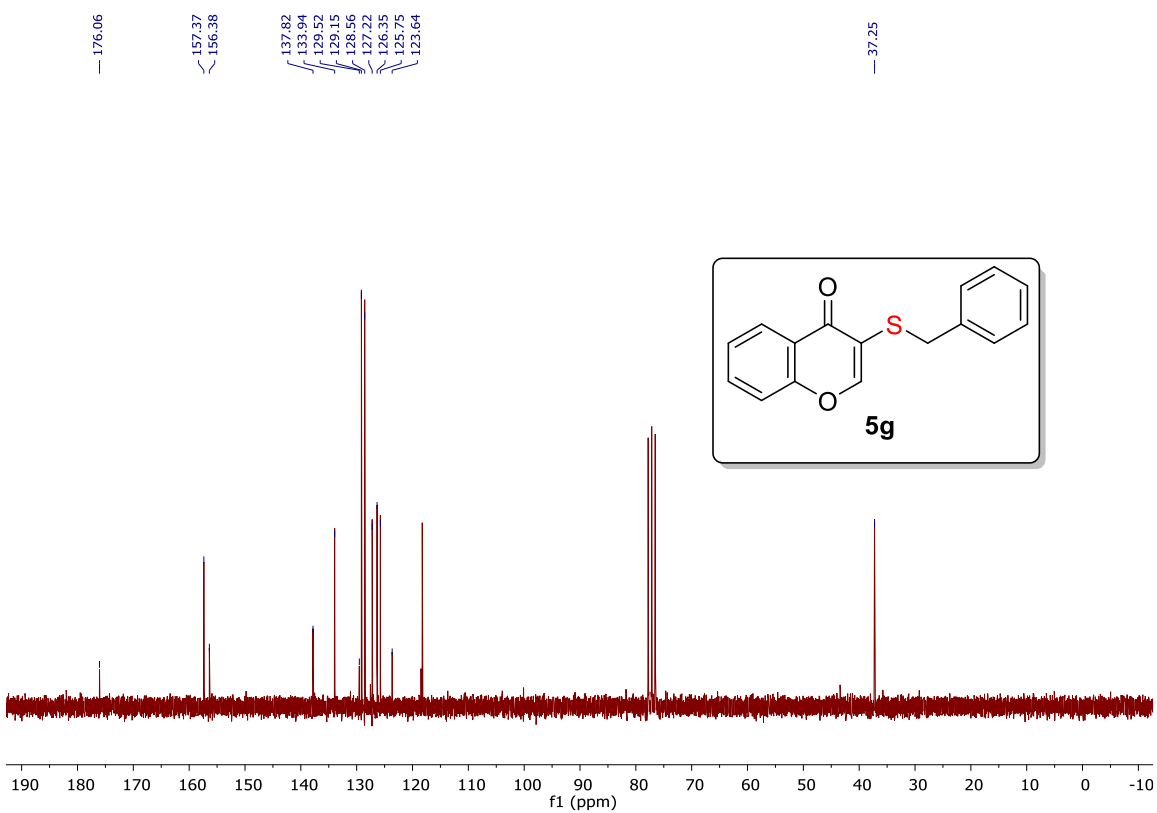Figure S39. <sup>13</sup>C NMR (50 MHz, CDCl<sub>3</sub>) spectrum of **5g**

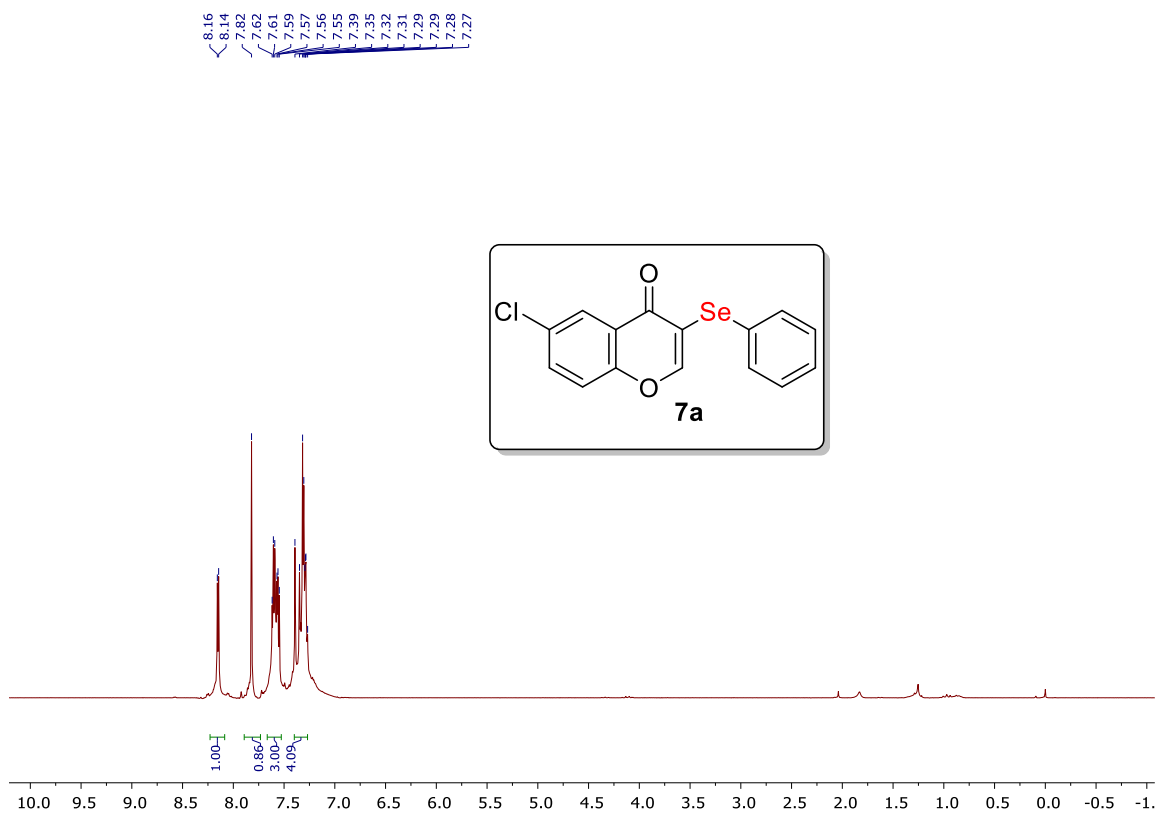Figure S40. <sup>1</sup>H NMR (200 MHz, CDCl<sub>3</sub>) spectrum of **7a**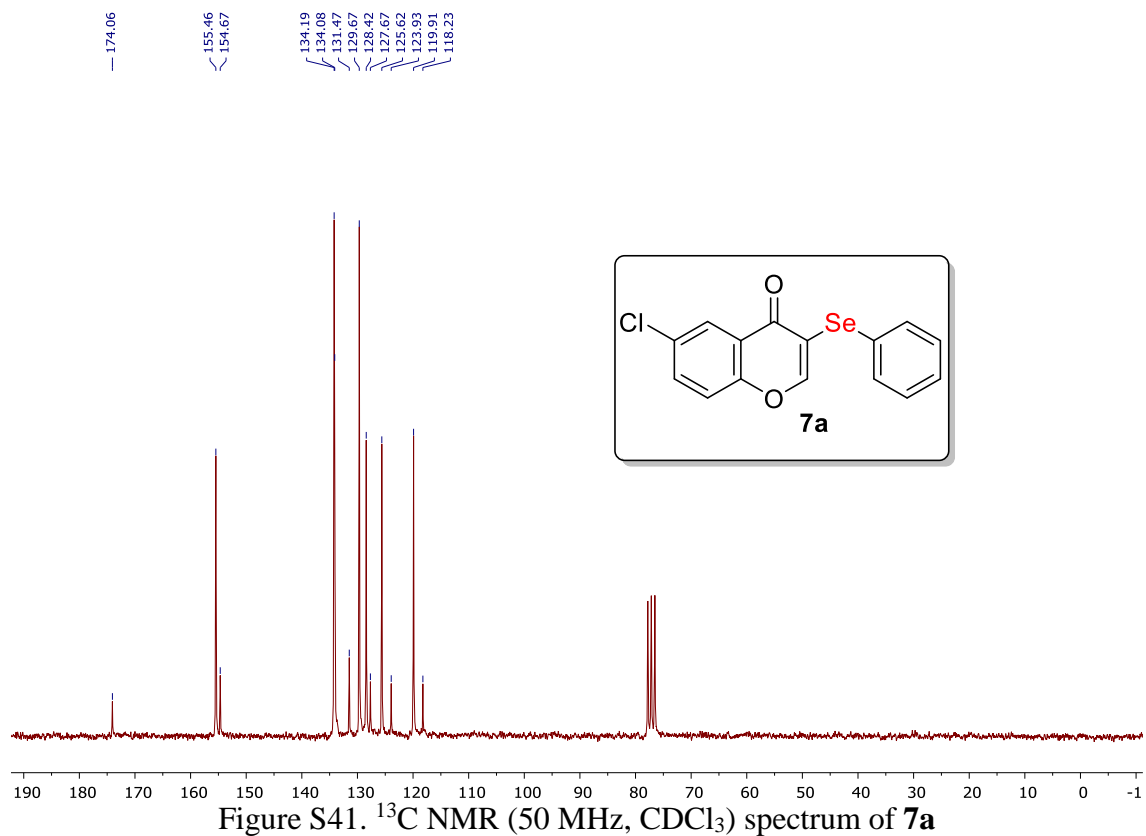Figure S41. <sup>13</sup>C NMR (50 MHz, CDCl<sub>3</sub>) spectrum of **7a**

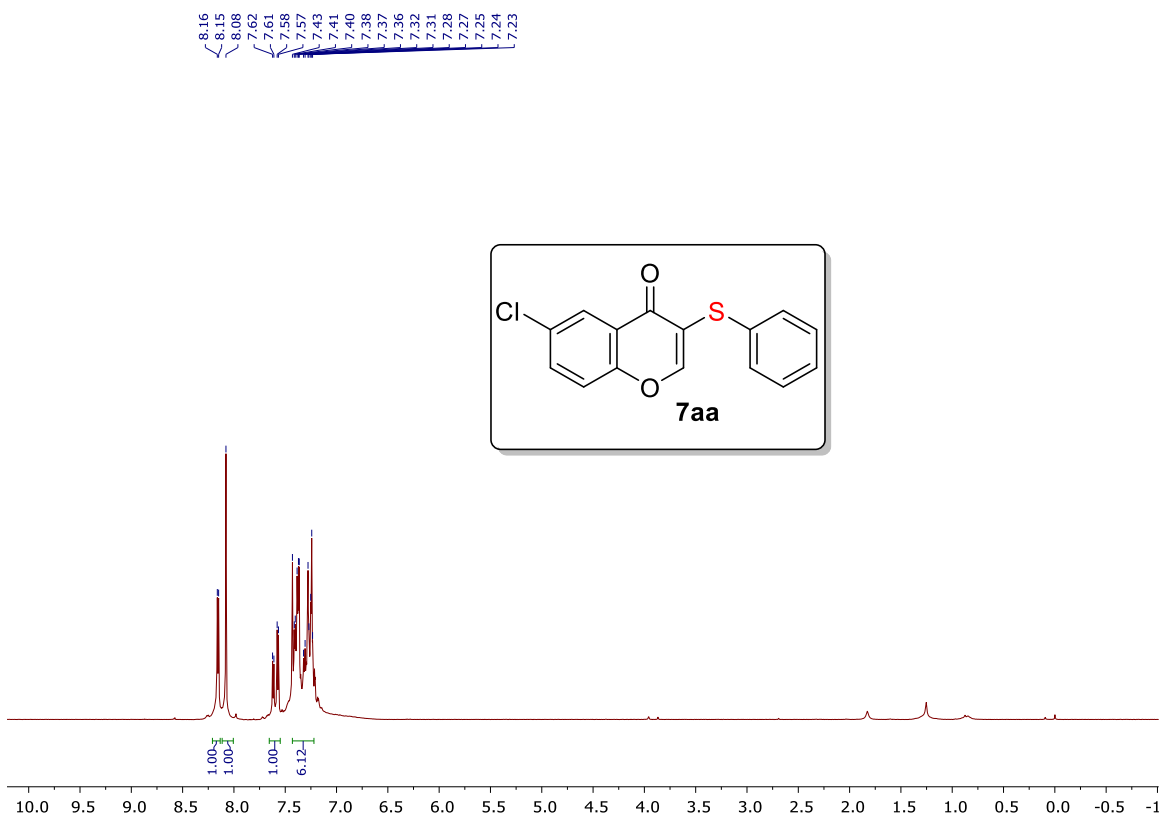Figure S42. <sup>1</sup>H NMR (200 MHz, CDCl<sub>3</sub>) spectrum of **7aa**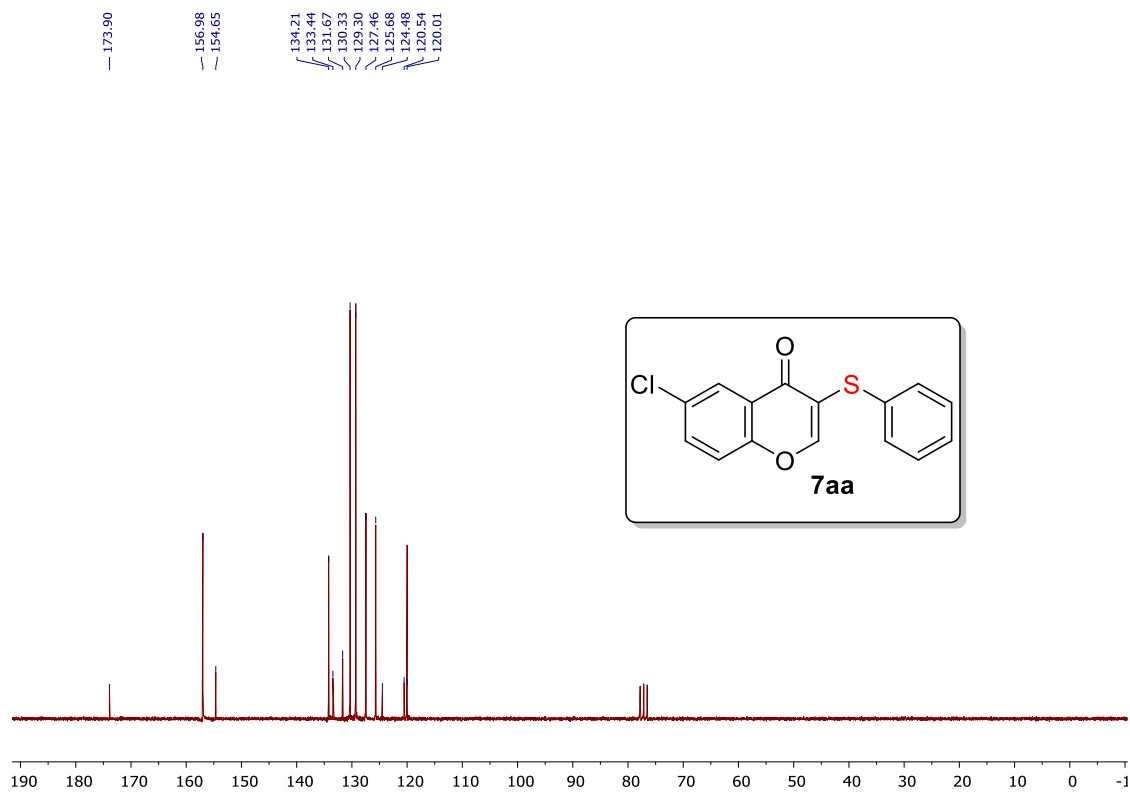Figure S43. <sup>13</sup>C NMR (50 MHz, CDCl<sub>3</sub>) spectrum of **7aa**

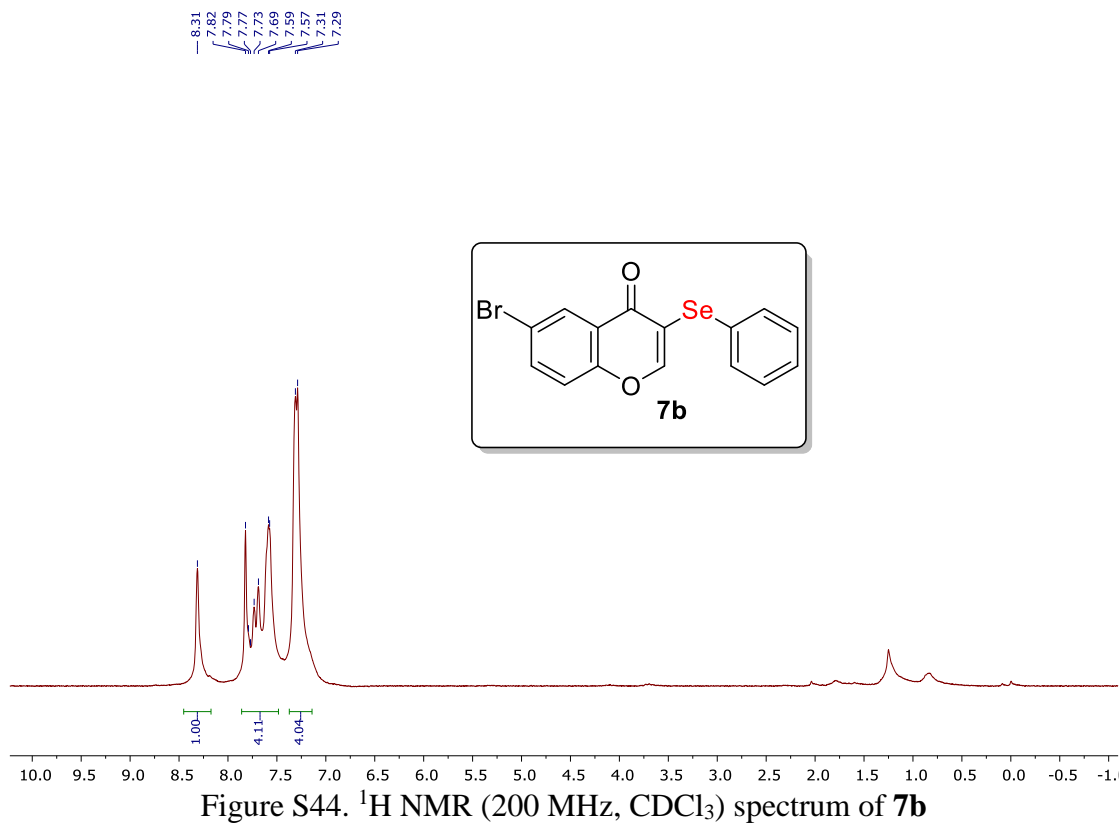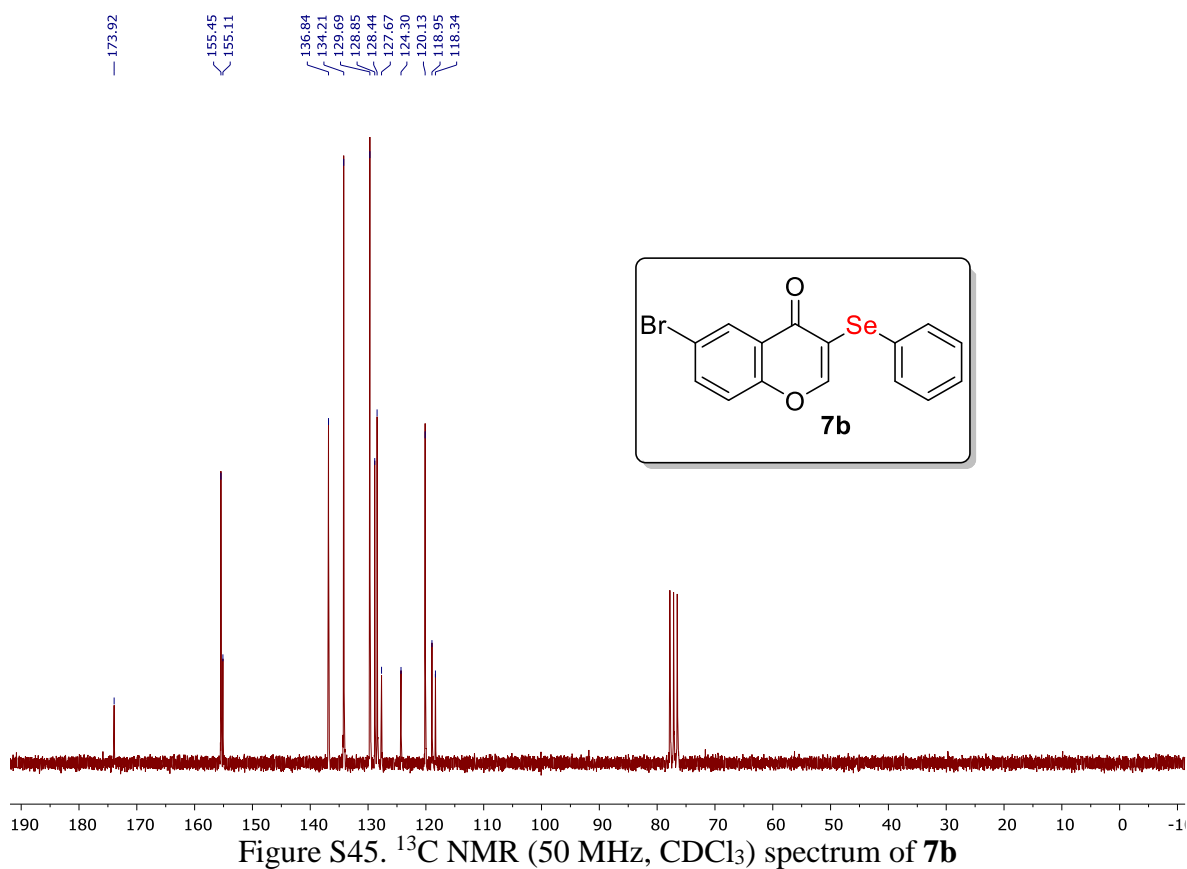



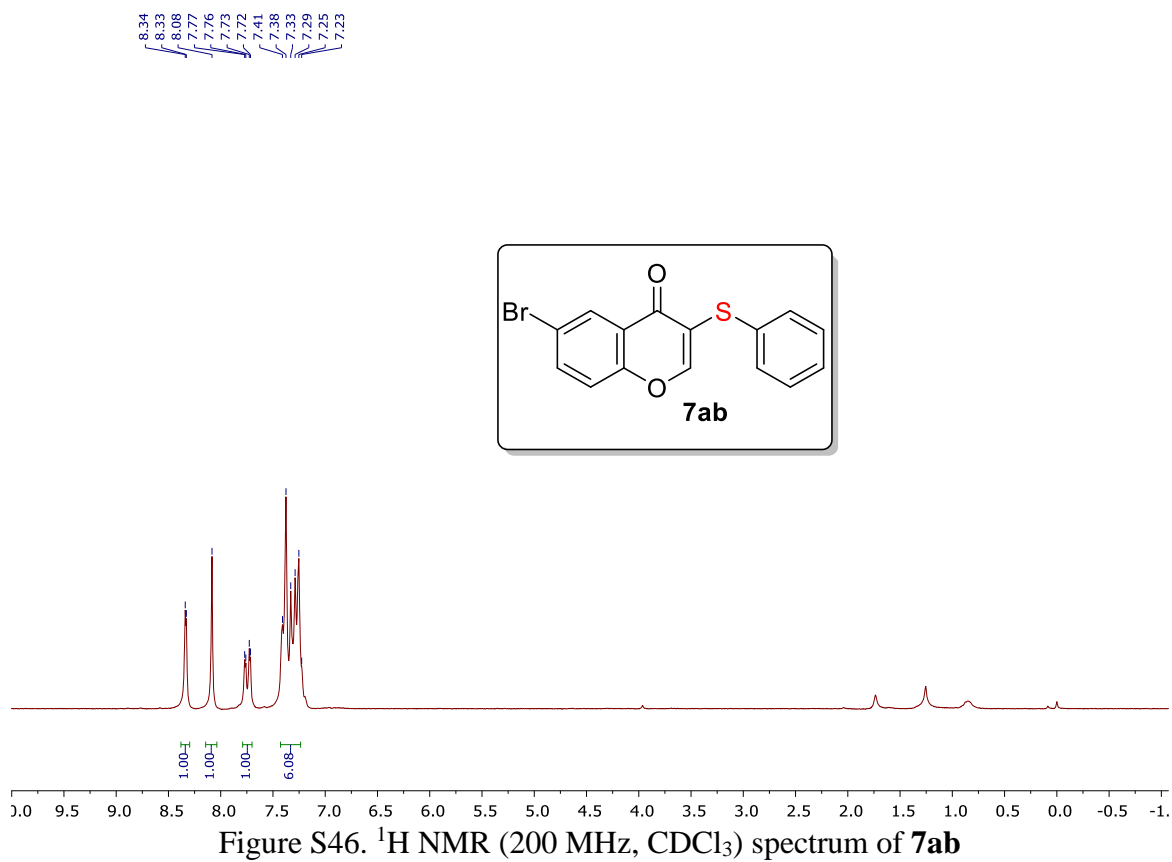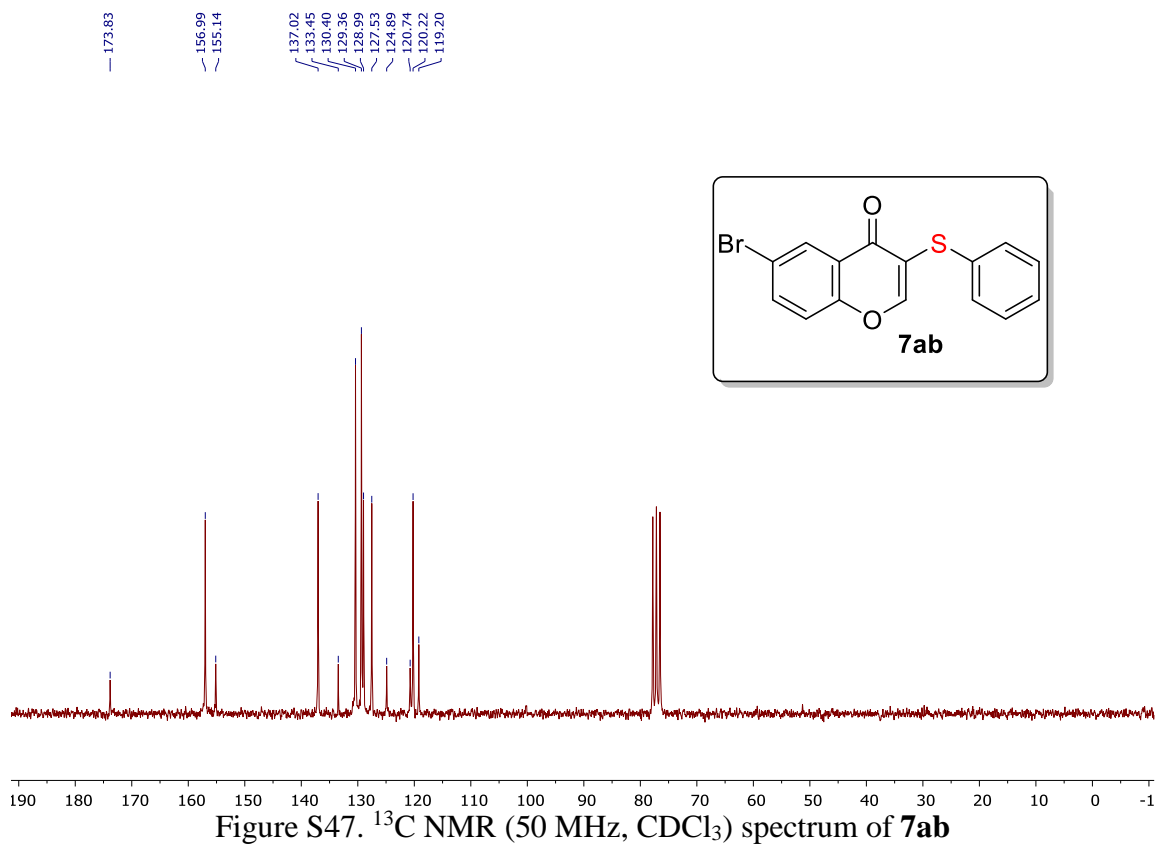

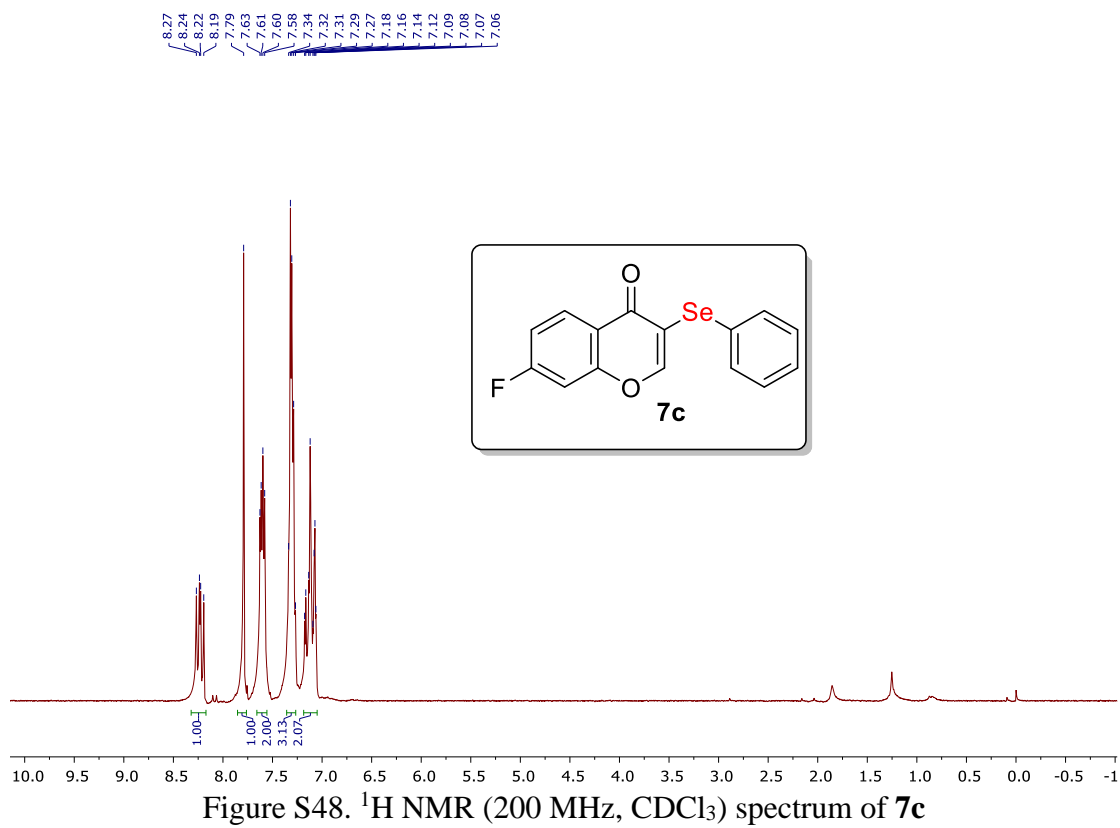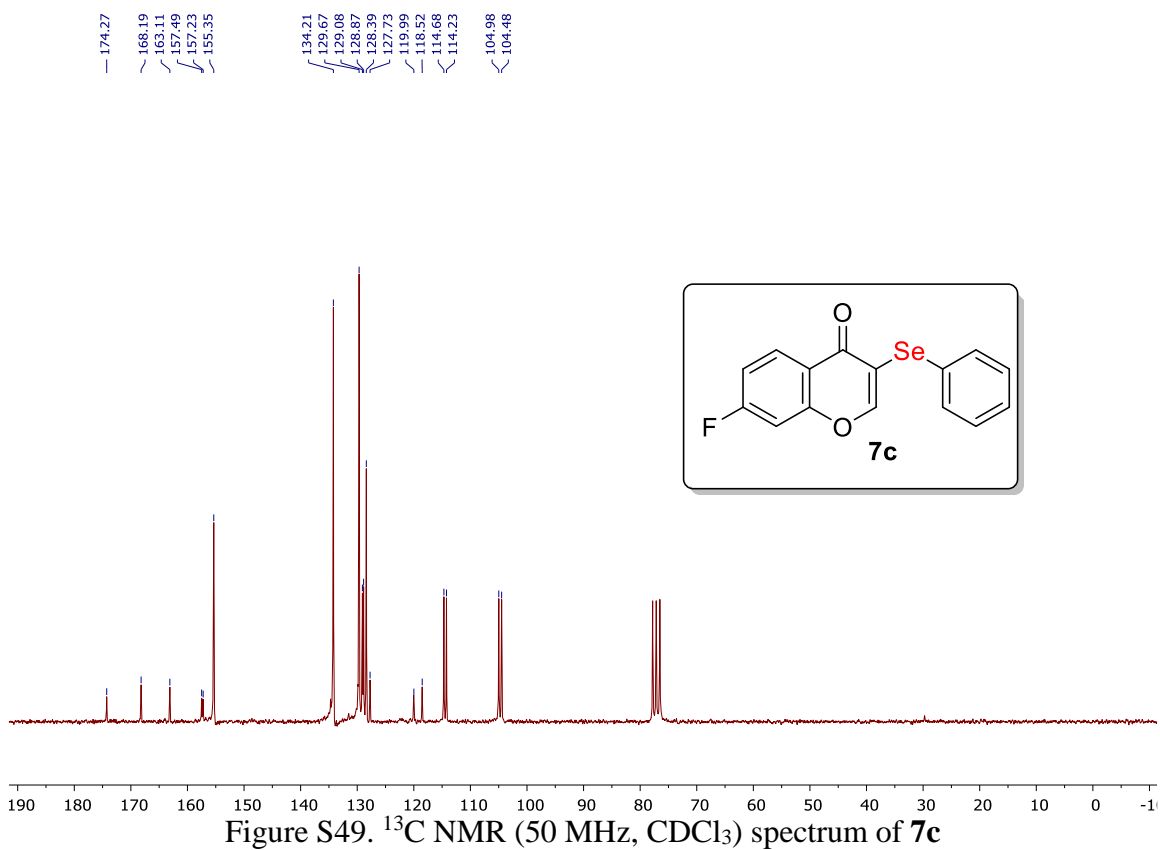

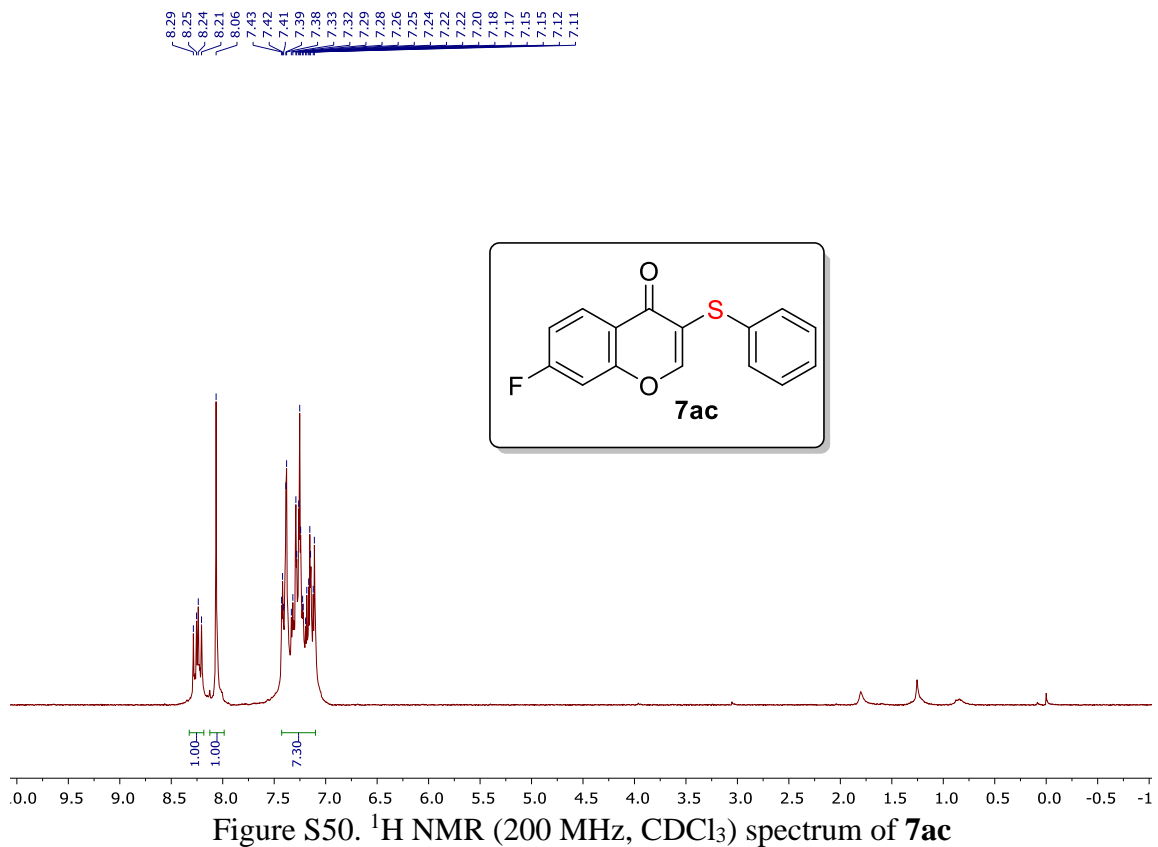Figure S50. <sup>1</sup>H NMR (200 MHz, CDCl<sub>3</sub>) spectrum of **7ac**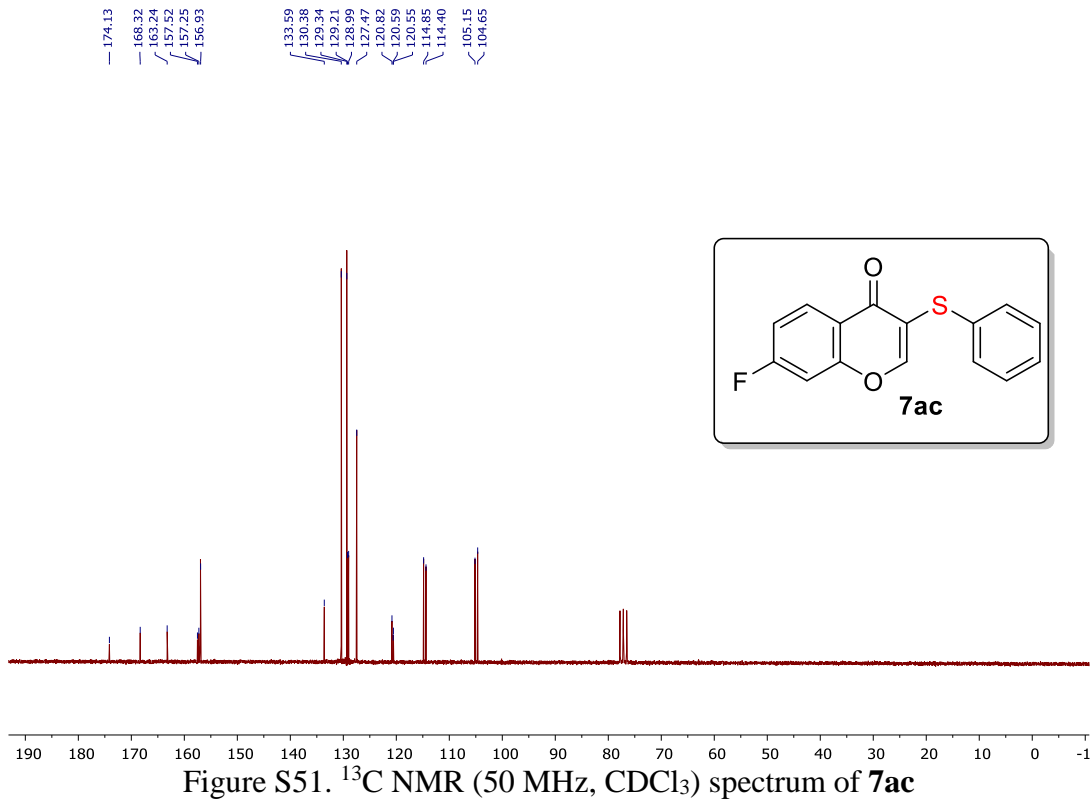Figure S51. <sup>13</sup>C NMR (50 MHz, CDCl<sub>3</sub>) spectrum of **7ac**

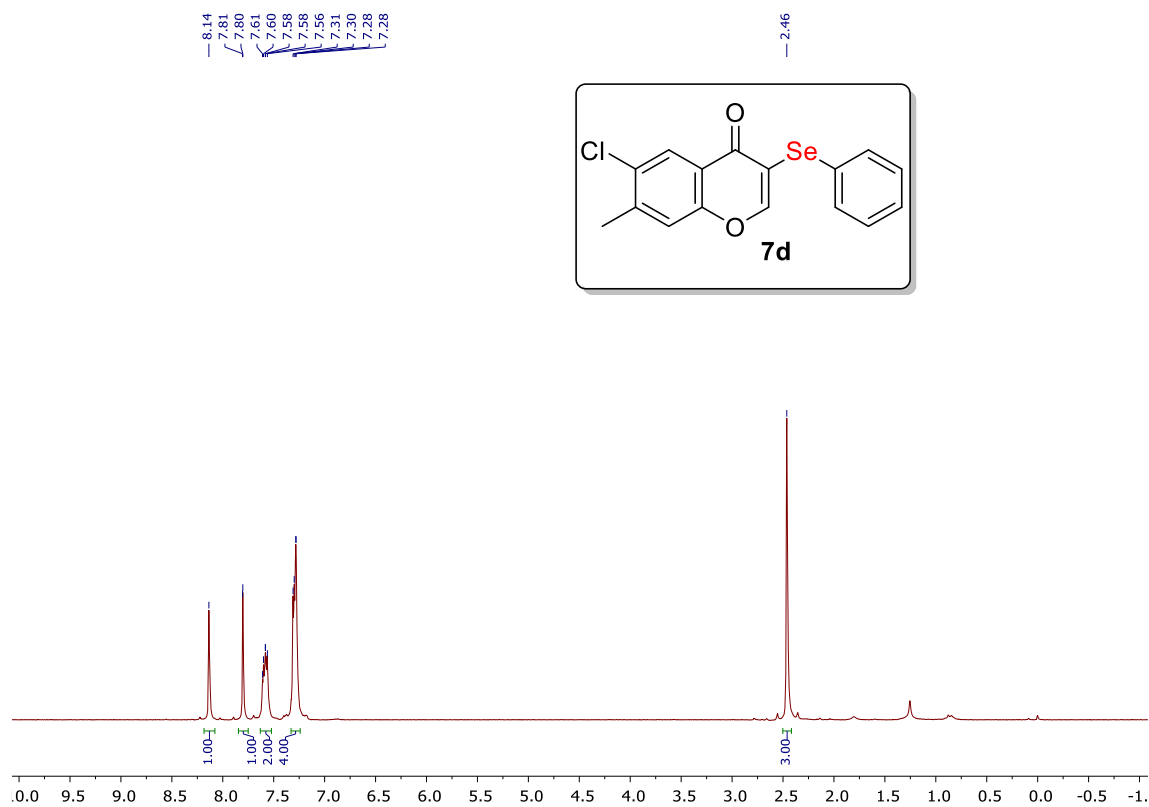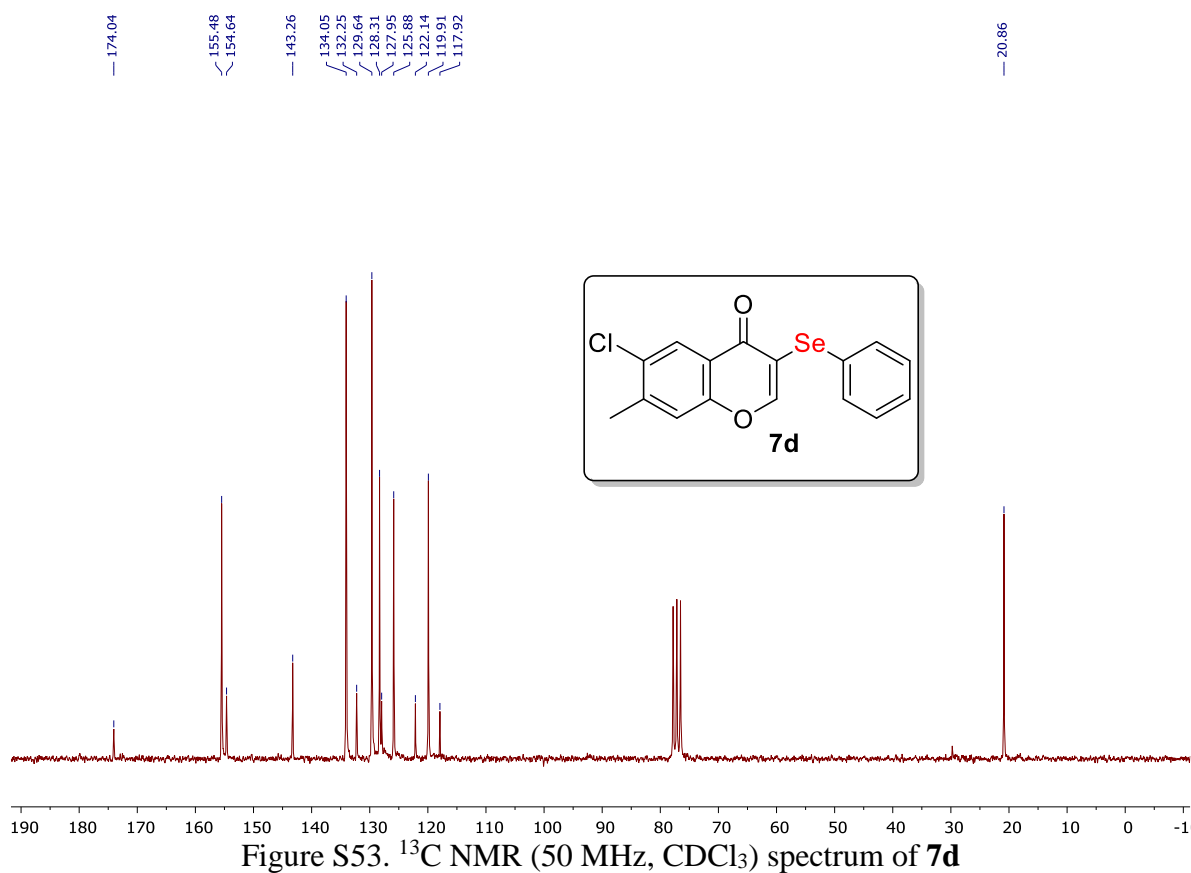

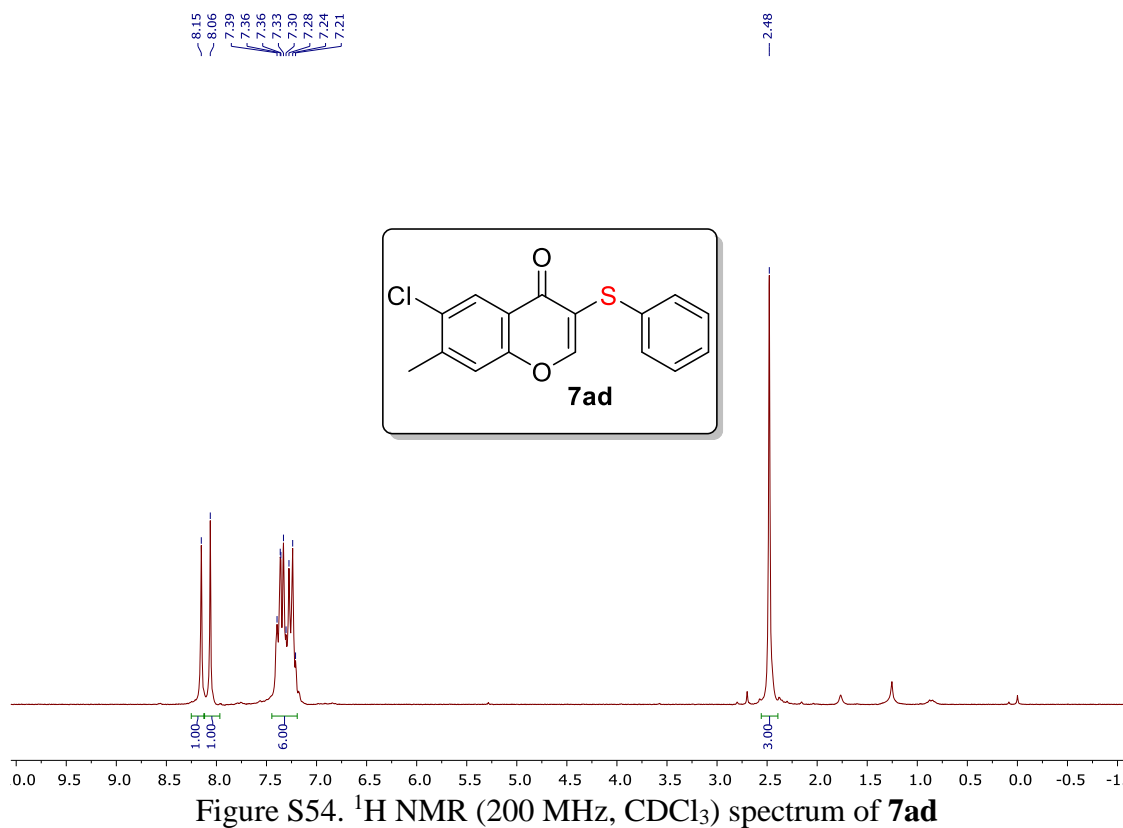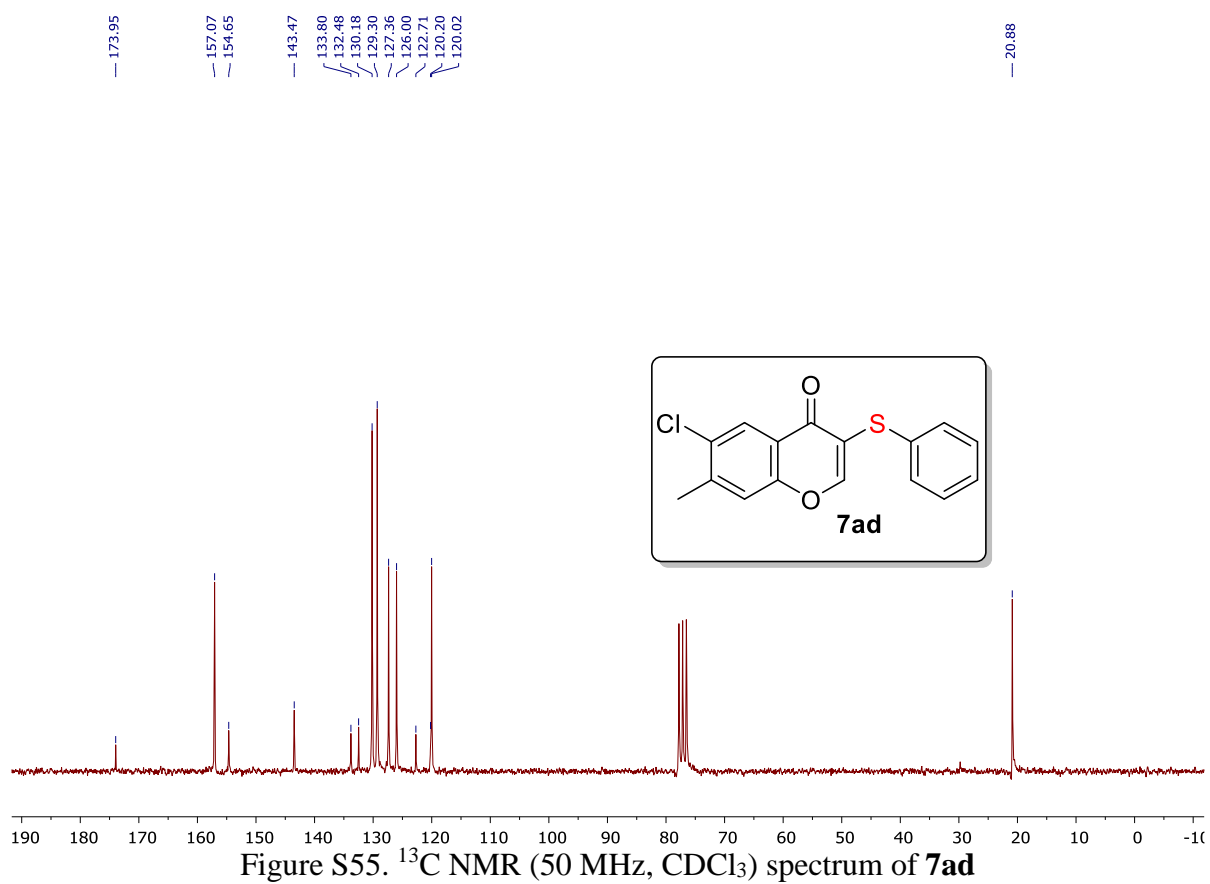

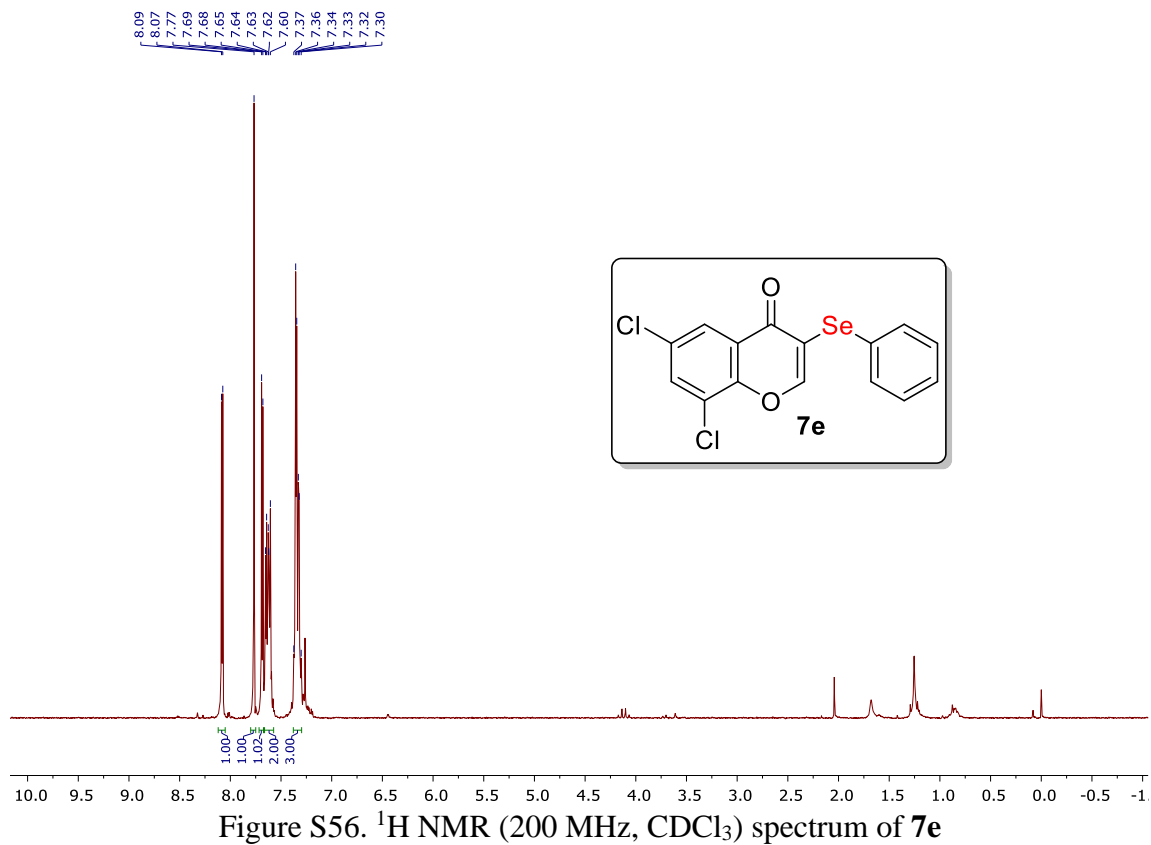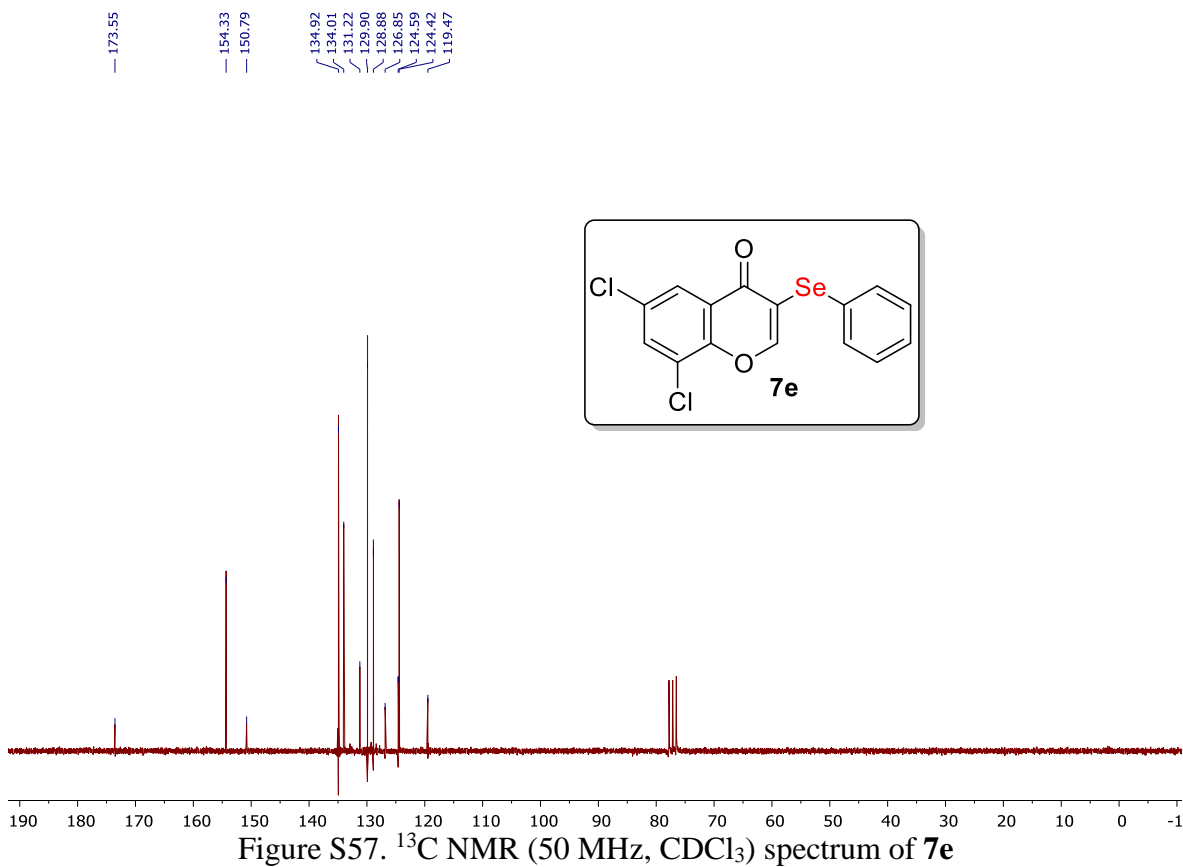

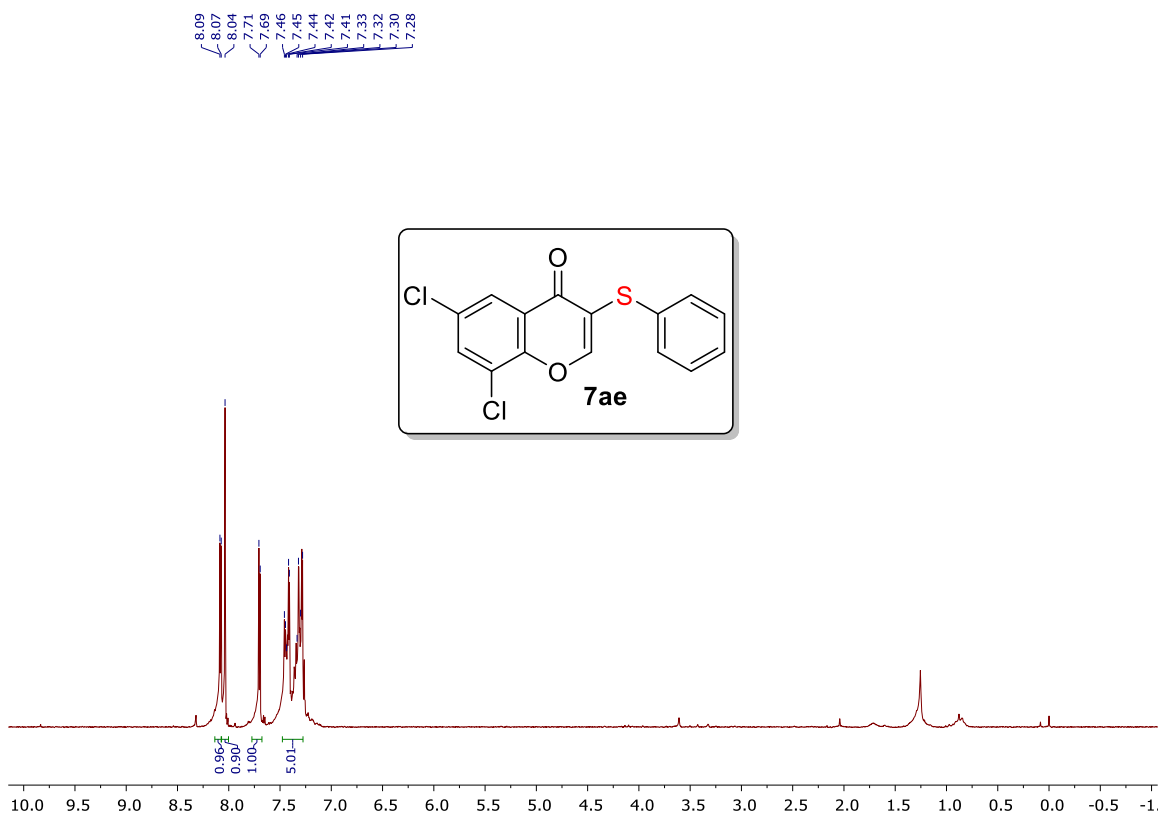Figure S58. <sup>1</sup>H NMR (200 MHz, CDCl<sub>3</sub>) spectrum of **7ae**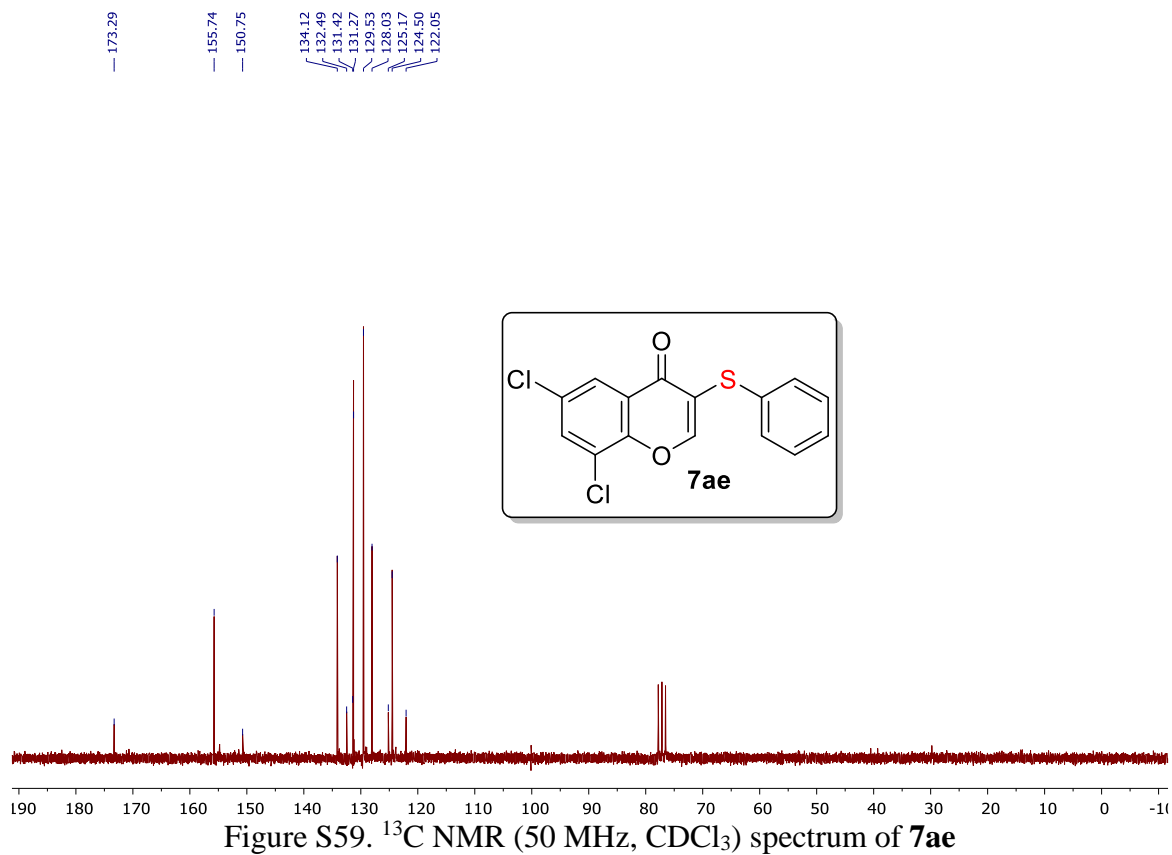Figure S59. <sup>13</sup>C NMR (50 MHz, CDCl<sub>3</sub>) spectrum of **7ae**

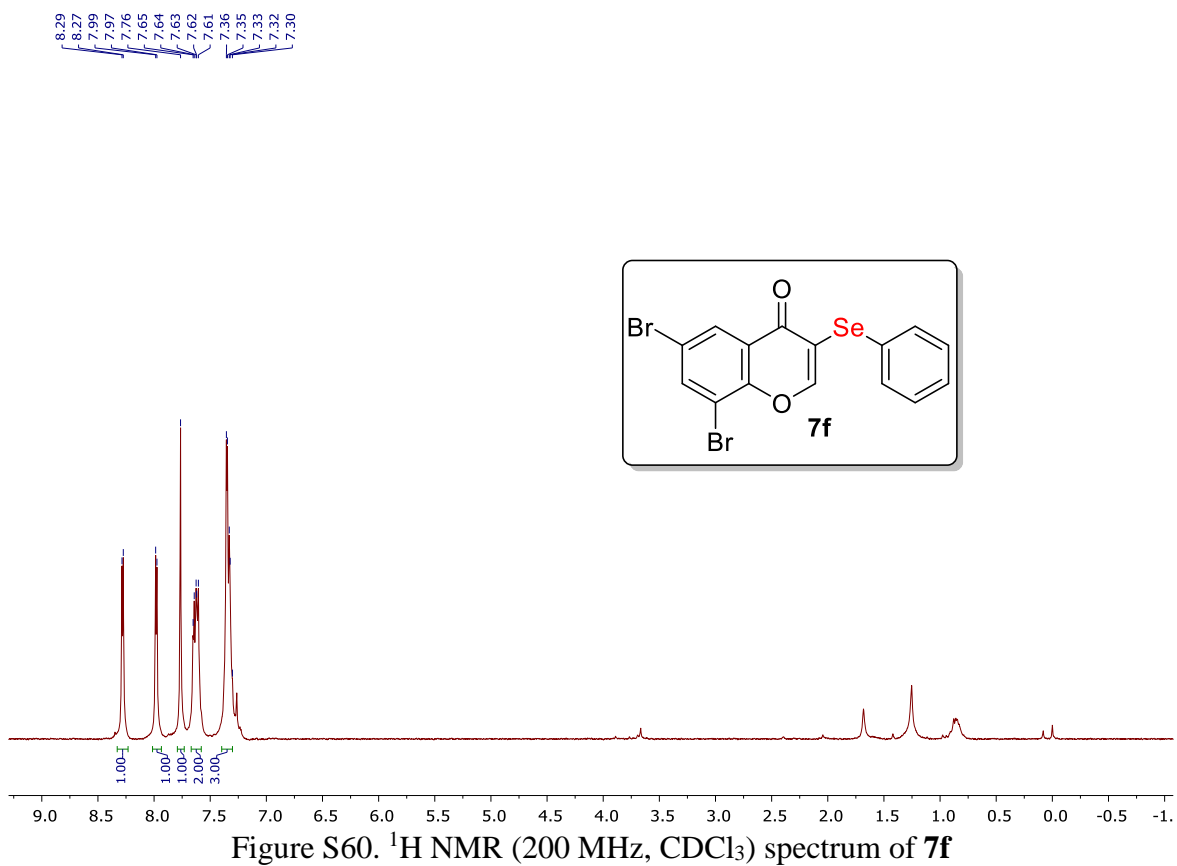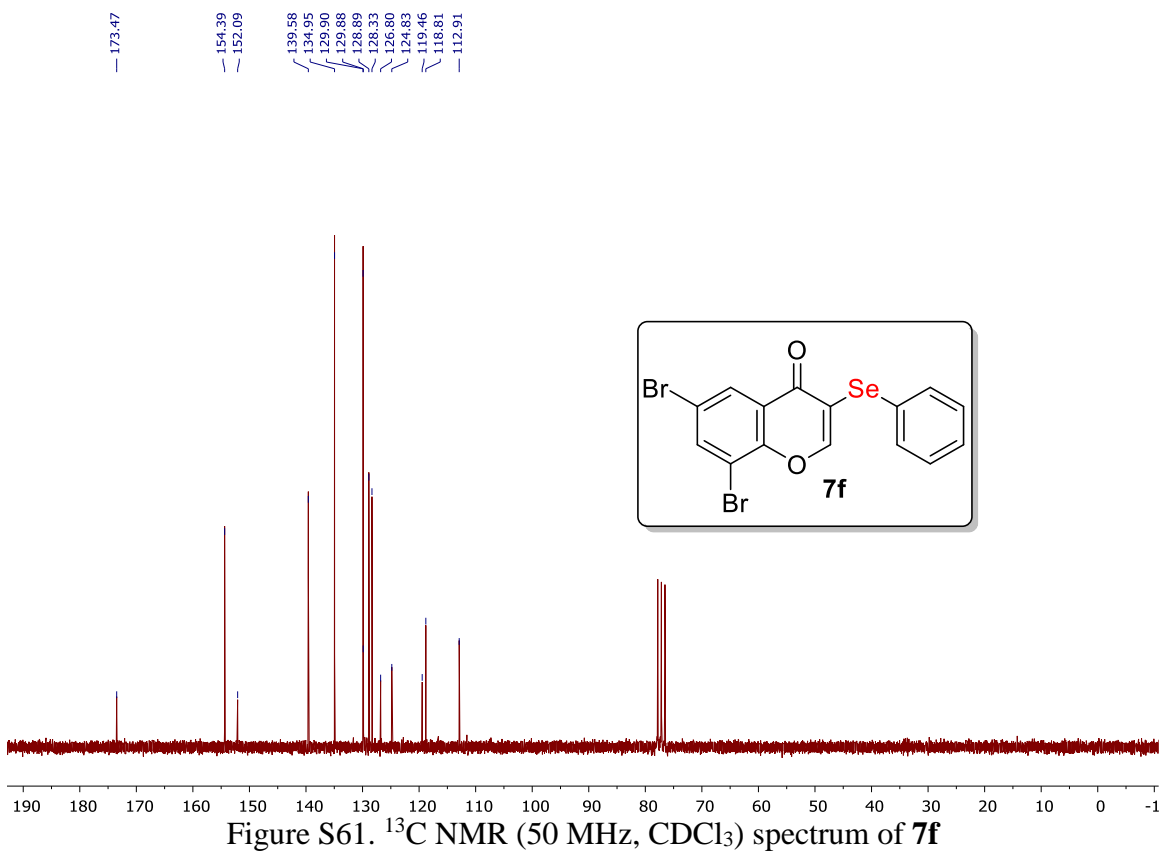



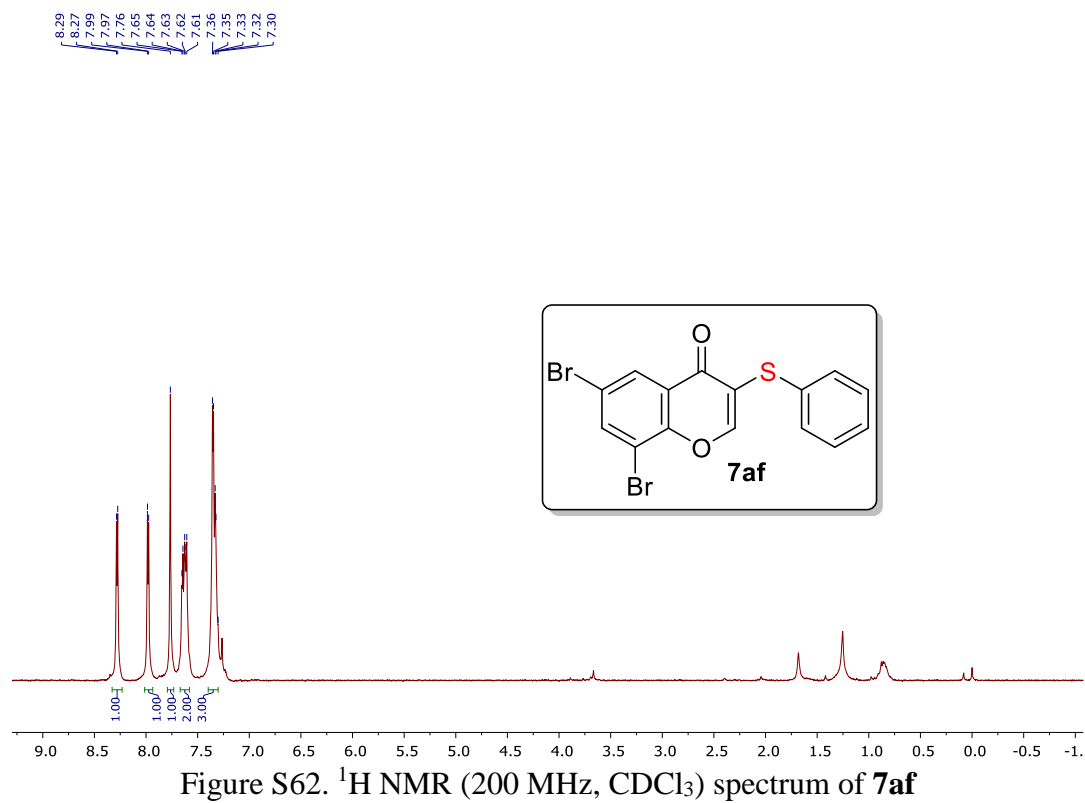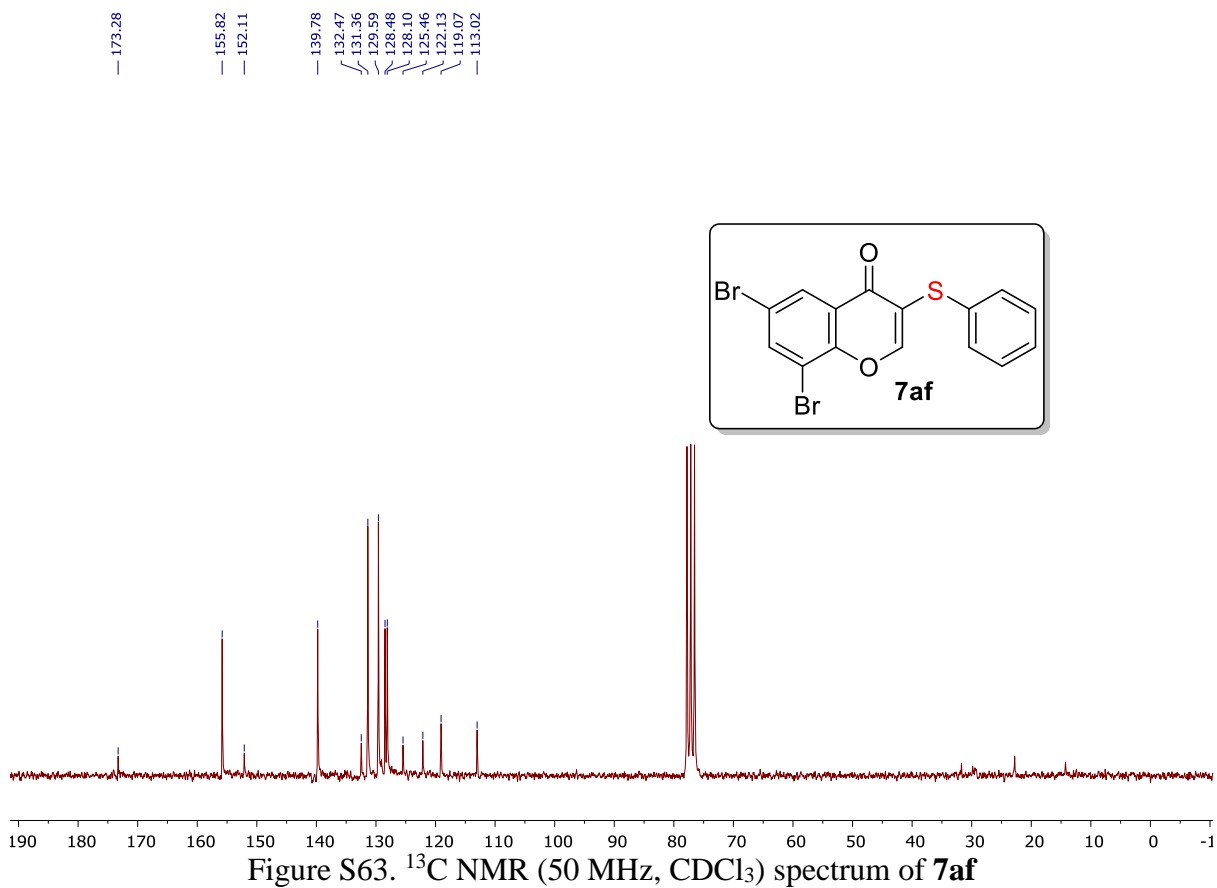

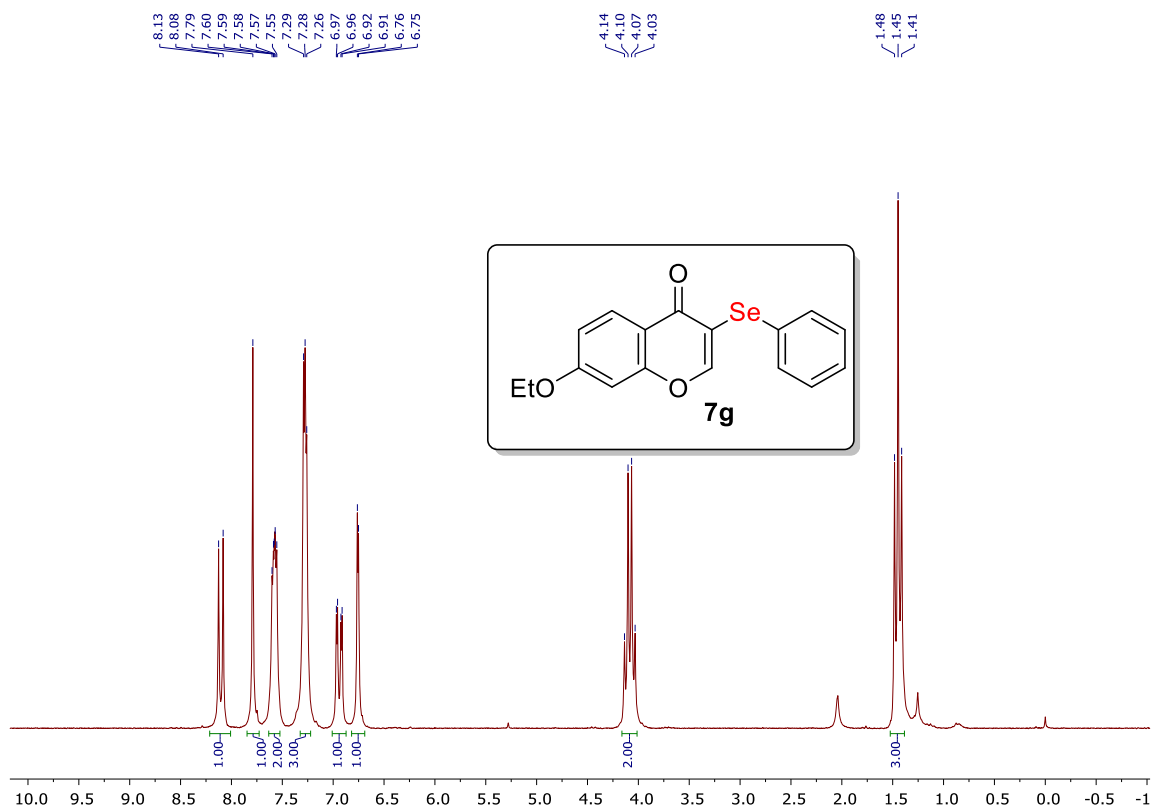Figure S64. <sup>1</sup>H NMR (200 MHz, CDCl<sub>3</sub>) spectrum of **7g**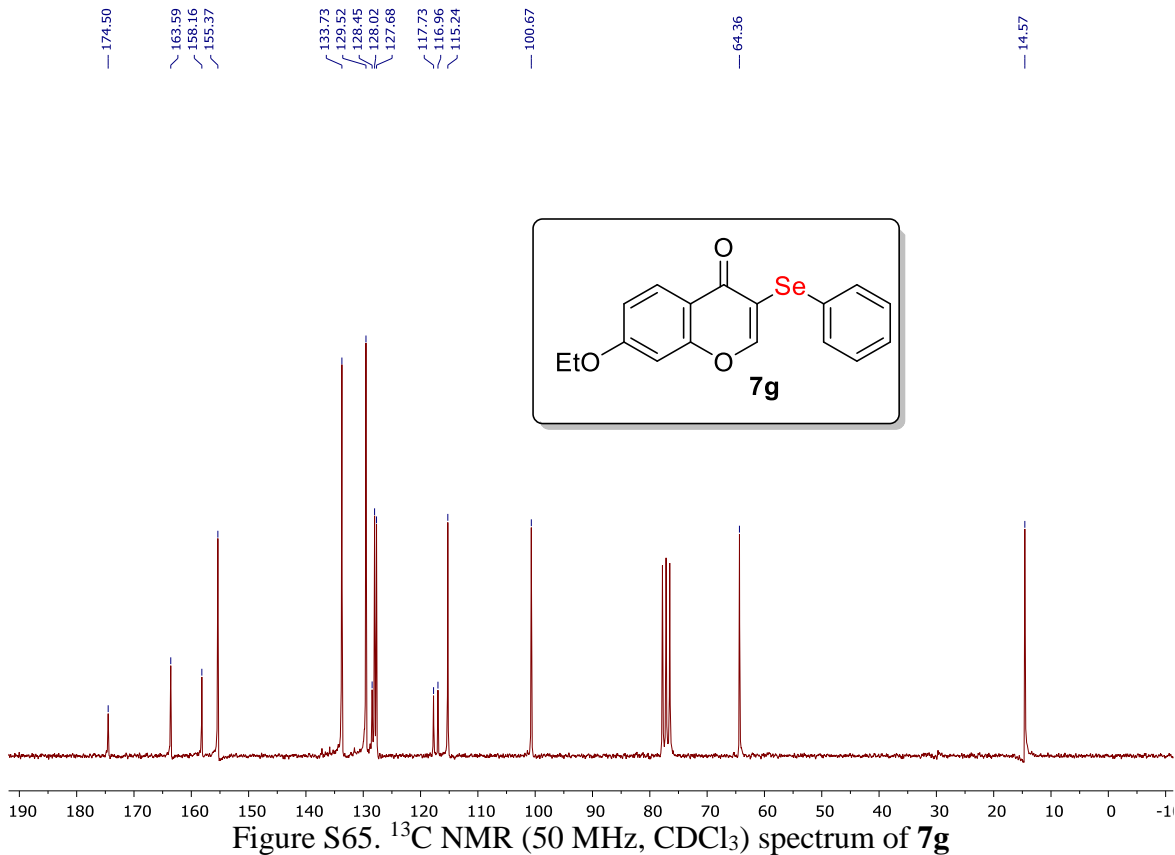Figure S65. <sup>13</sup>C NMR (50 MHz, CDCl<sub>3</sub>) spectrum of **7g**

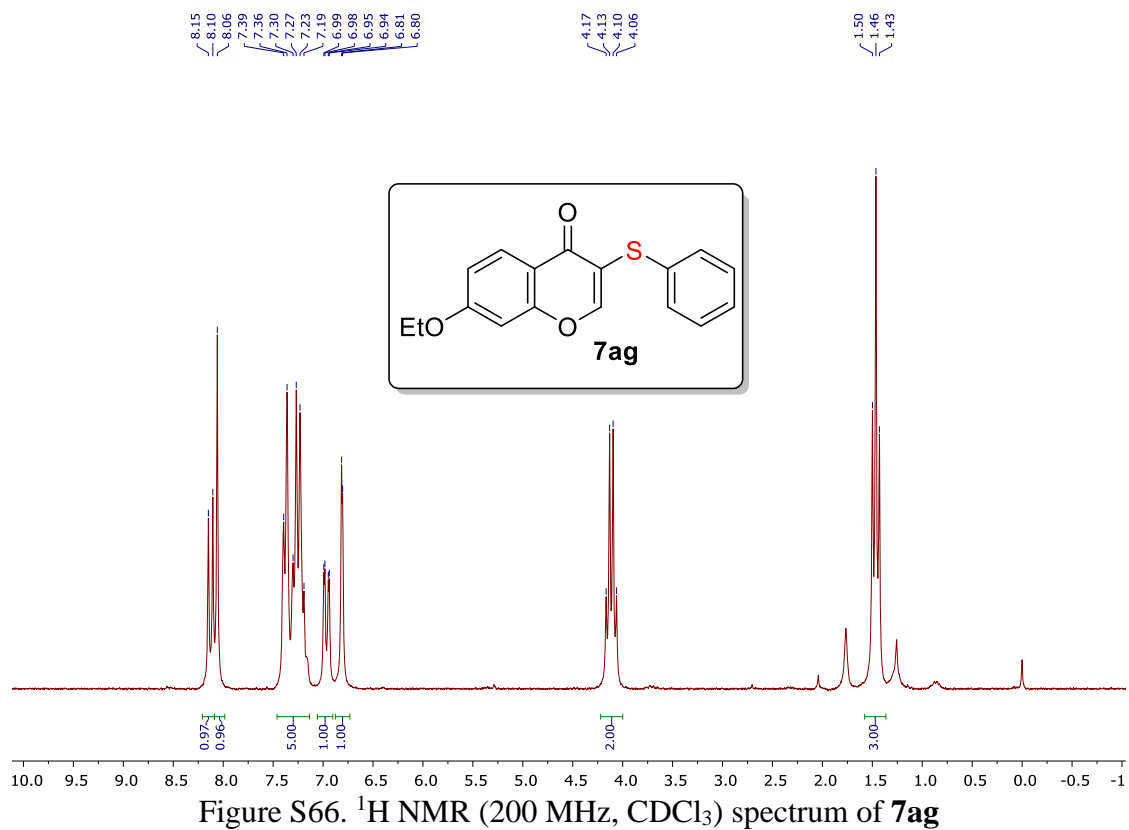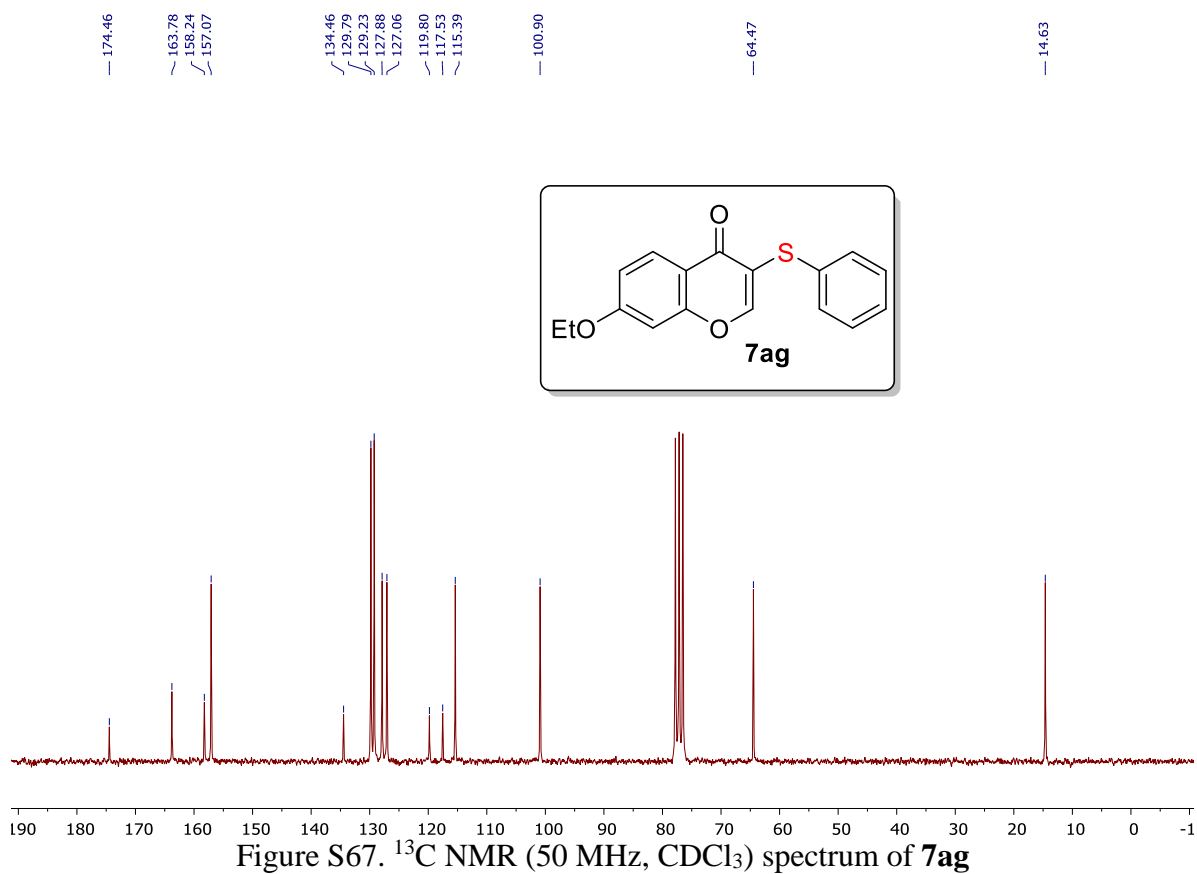

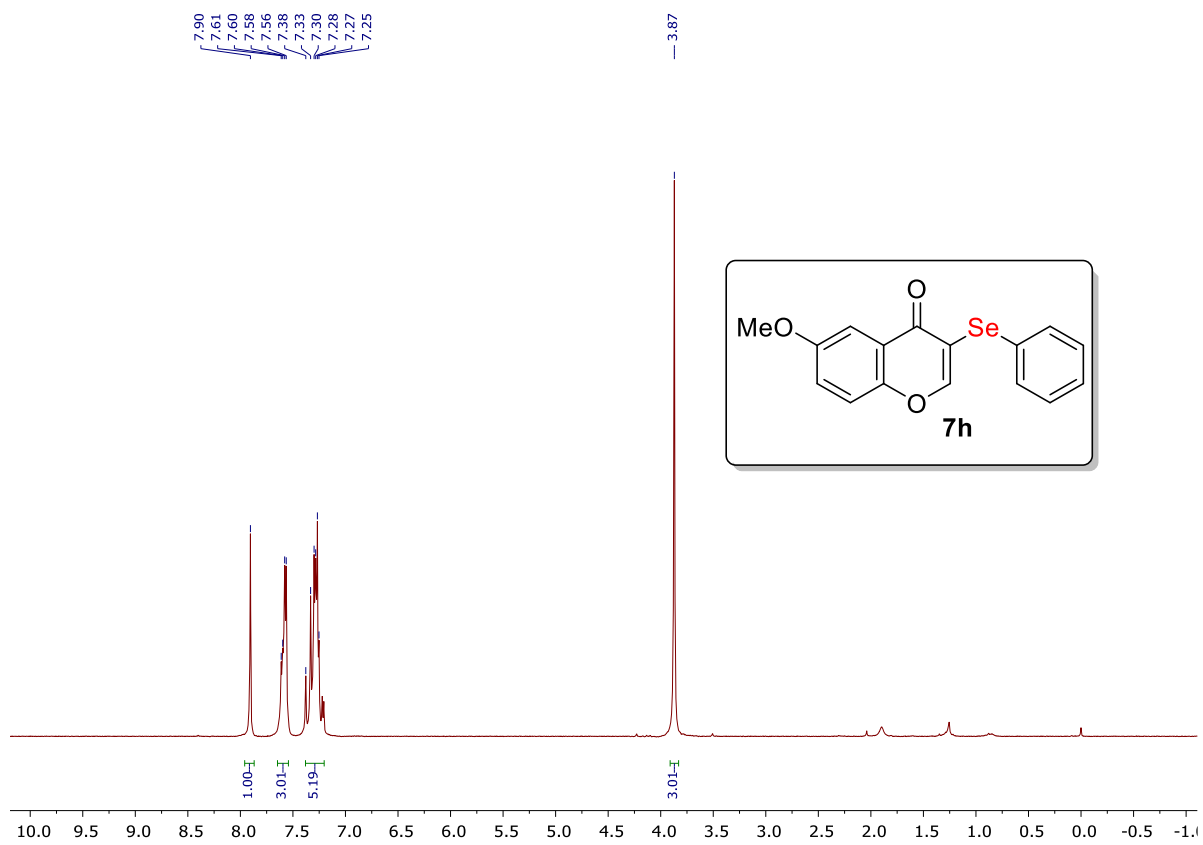Figure S68.  $^1\text{H}$  NMR (200 MHz,  $\text{CDCl}_3$ ) spectrum of **7h**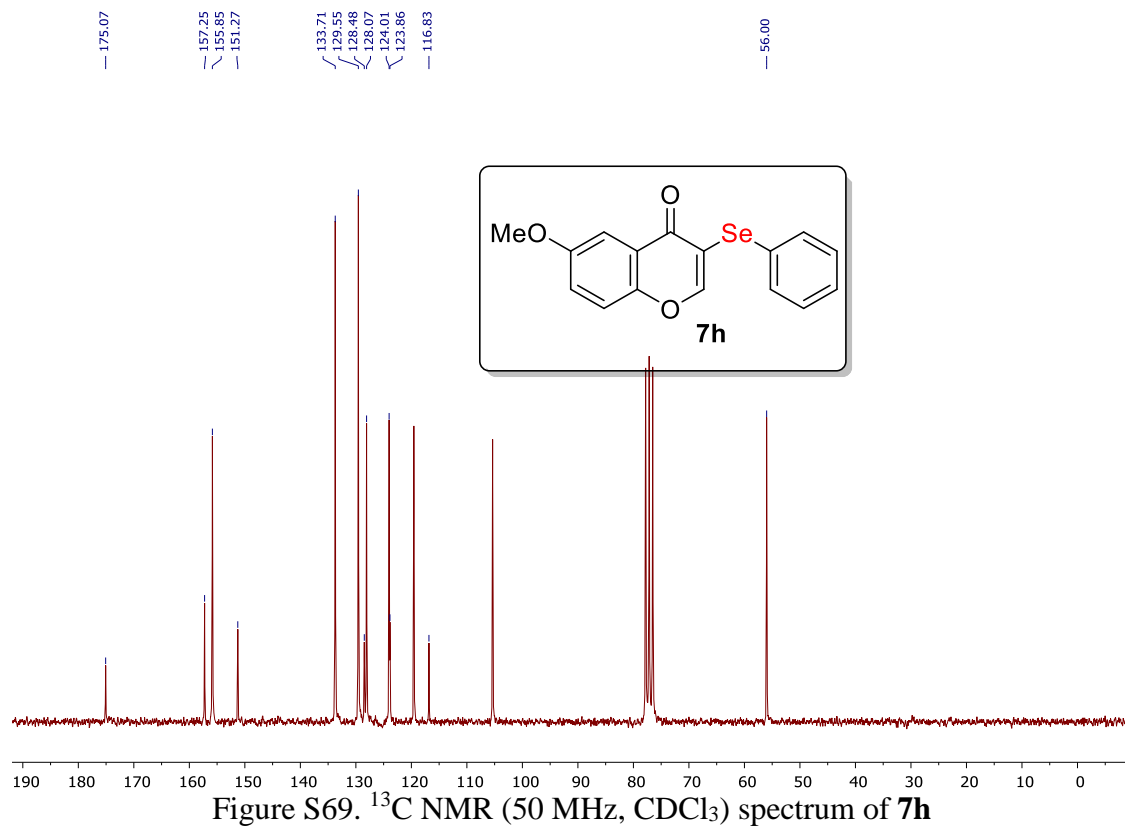Figure S69.  $^{13}\text{C}$  NMR (50 MHz,  $\text{CDCl}_3$ ) spectrum of **7h**

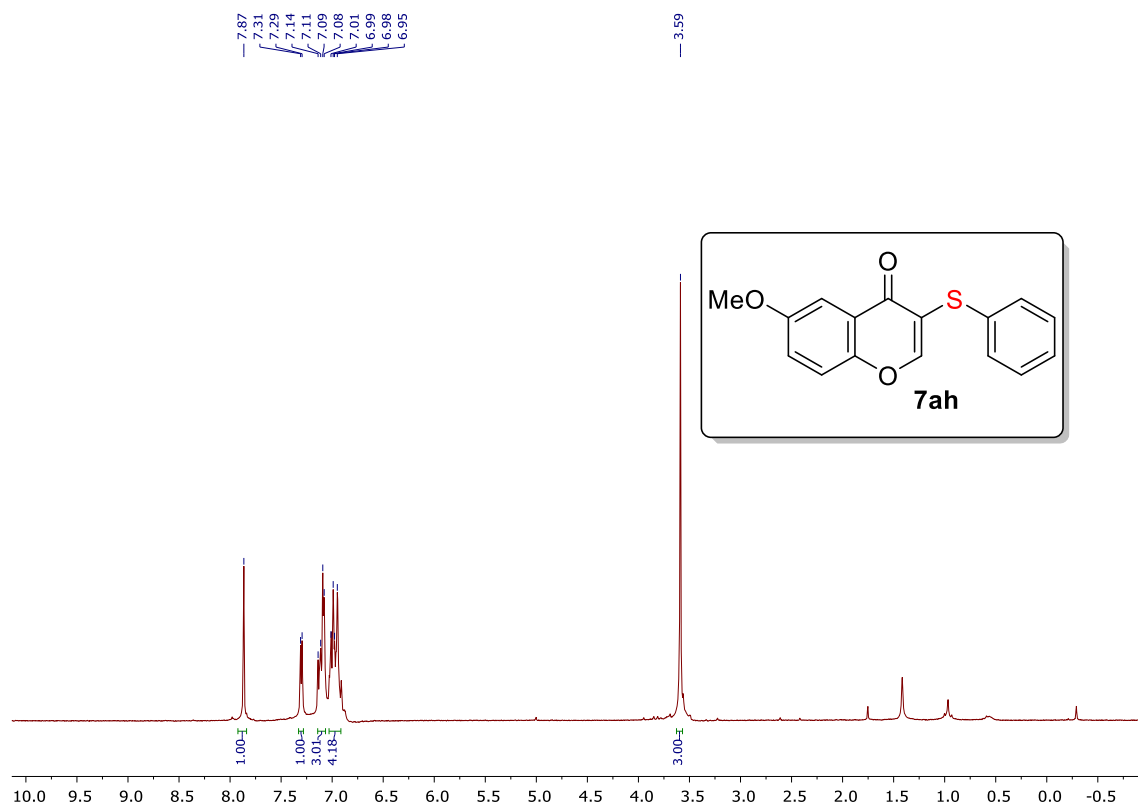Figure S70. <sup>1</sup>H NMR (200 MHz, CDCl<sub>3</sub>) spectrum of **7ah**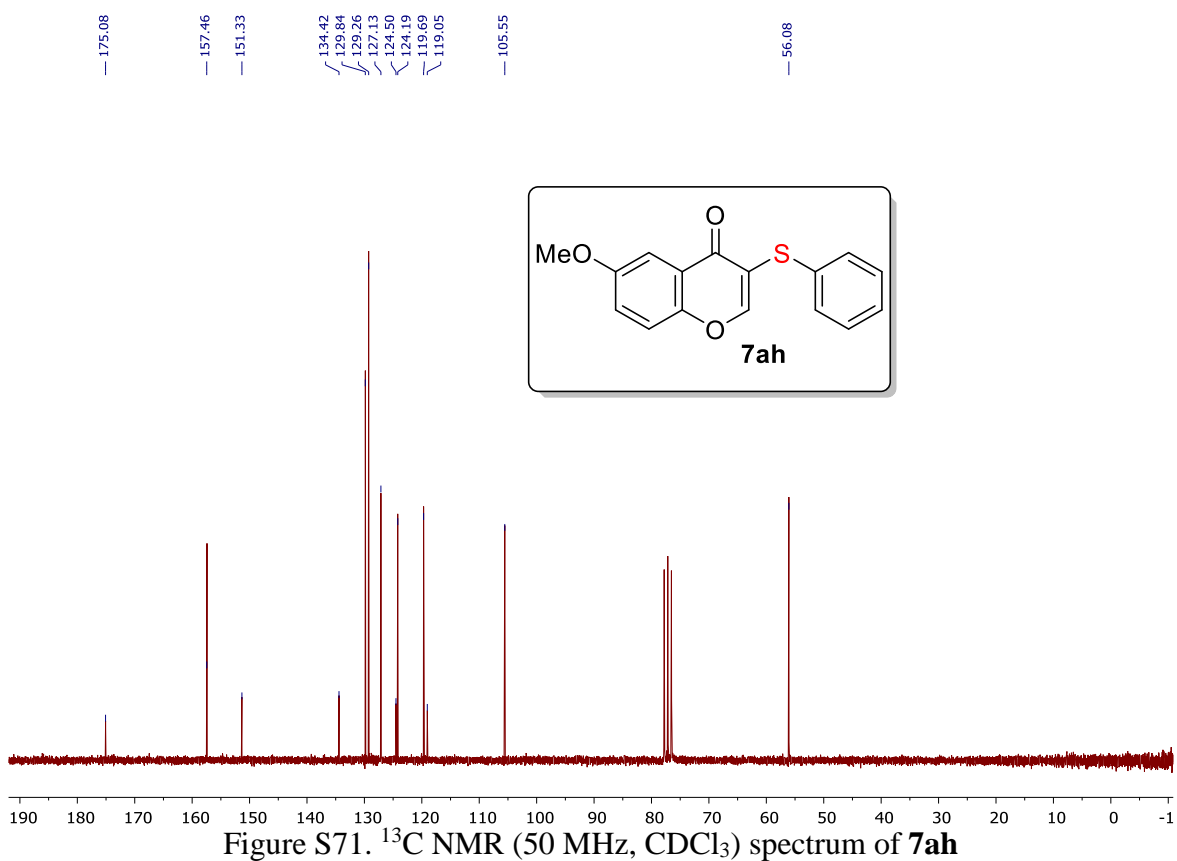Figure S71. <sup>13</sup>C NMR (50 MHz, CDCl<sub>3</sub>) spectrum of **7ah**

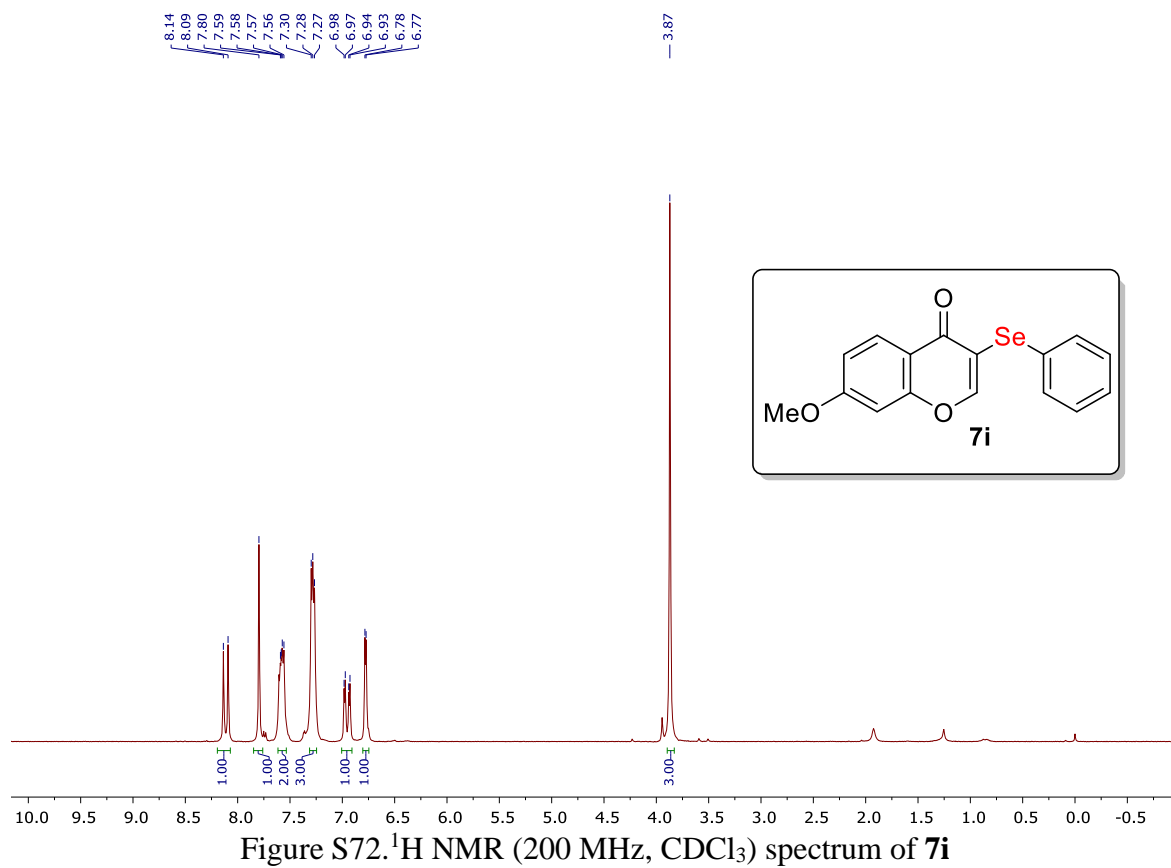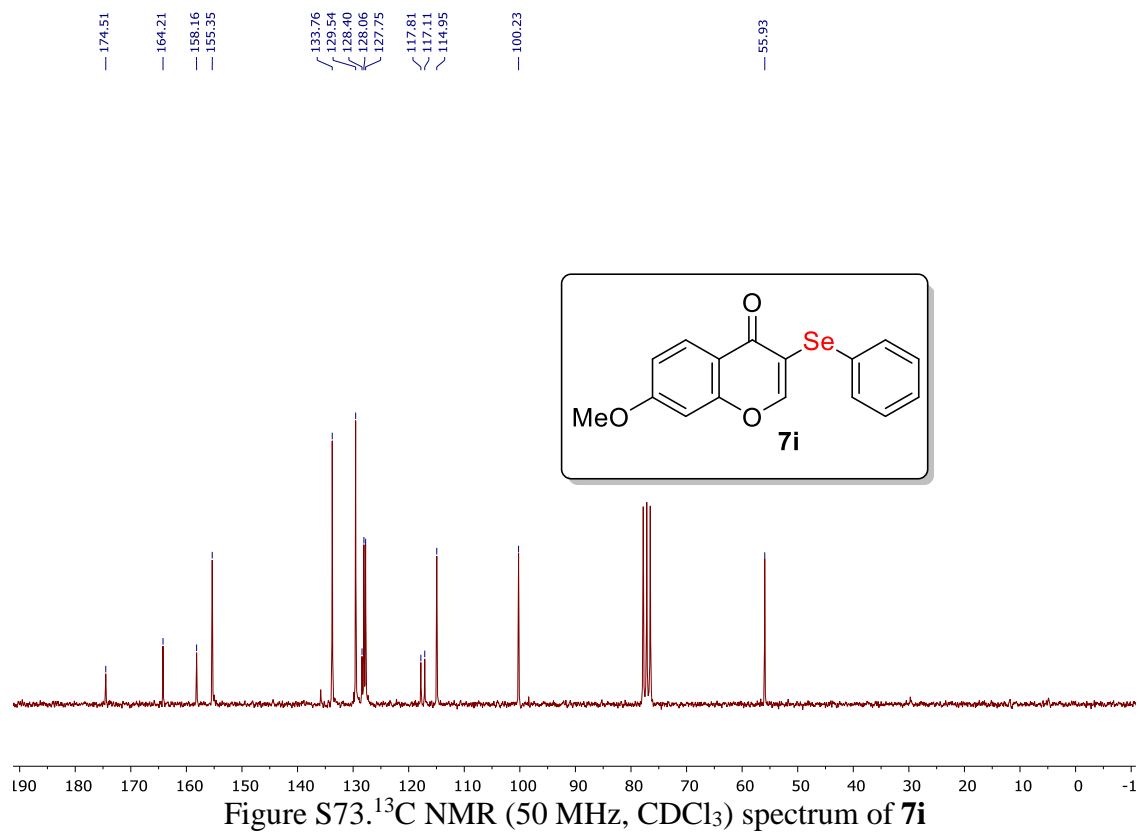

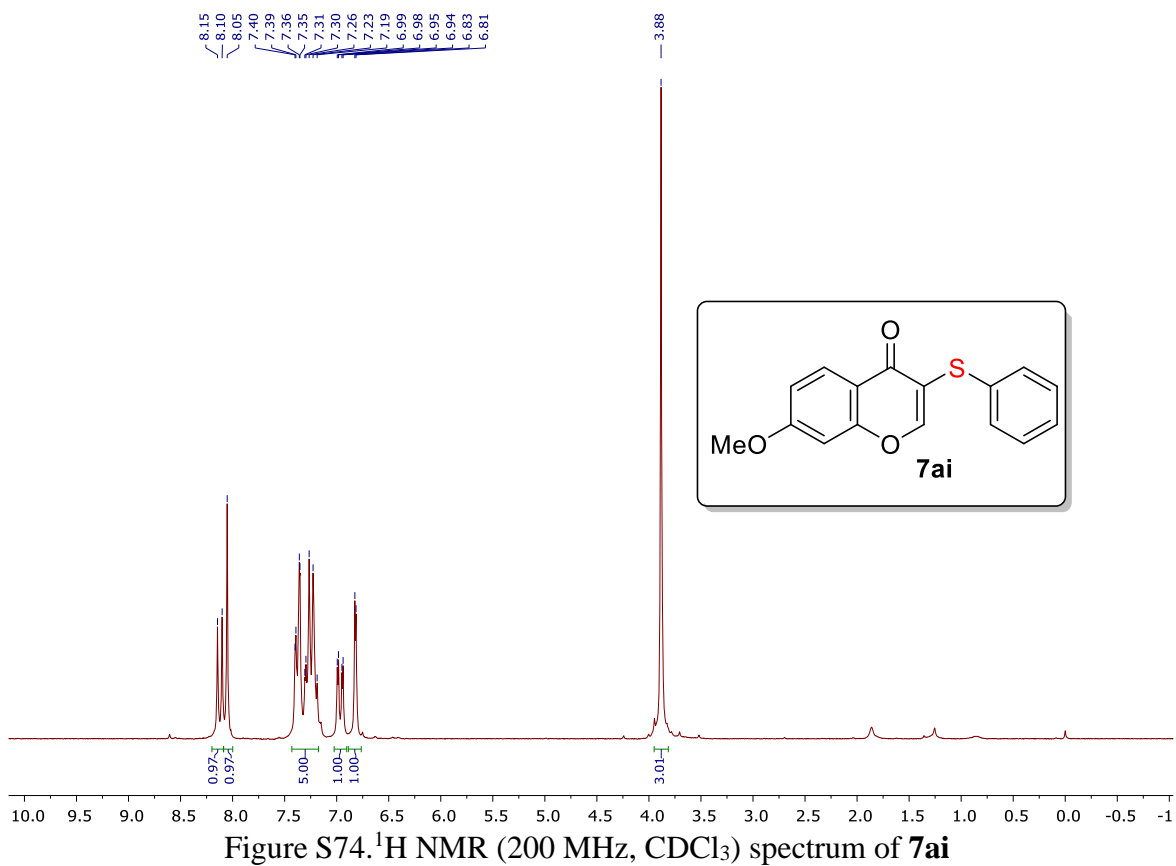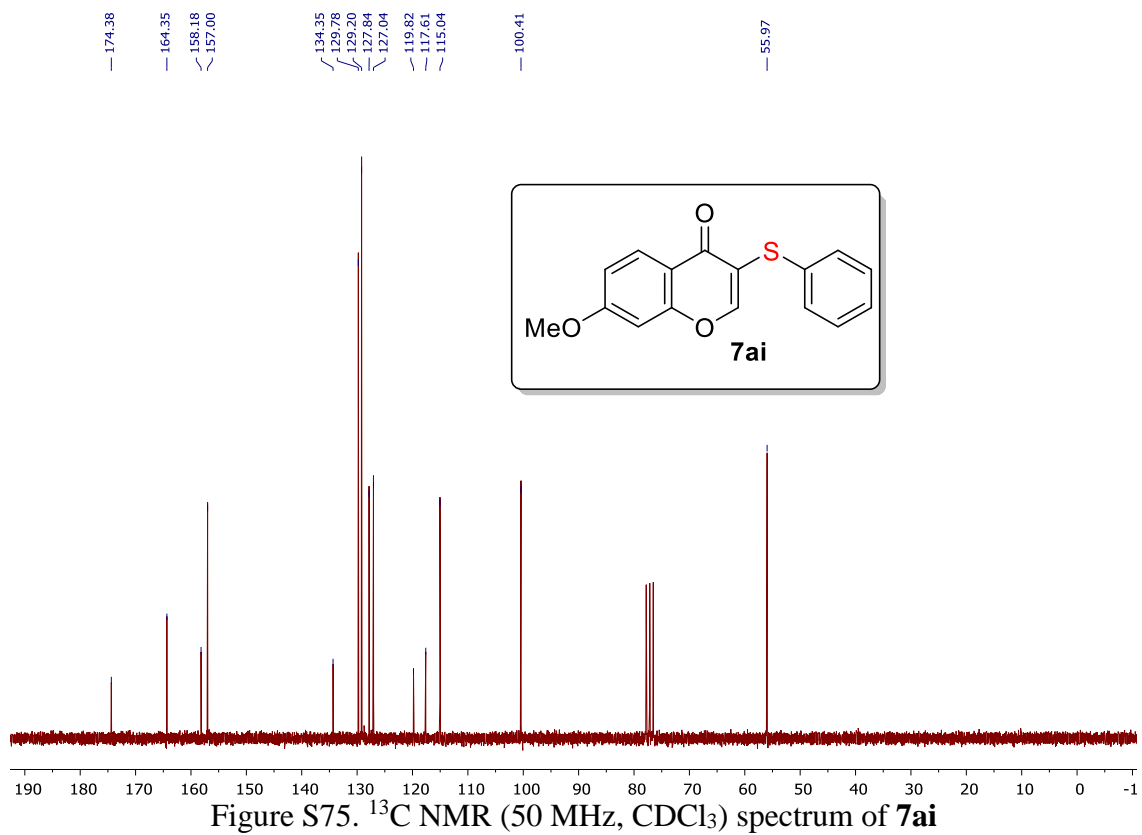

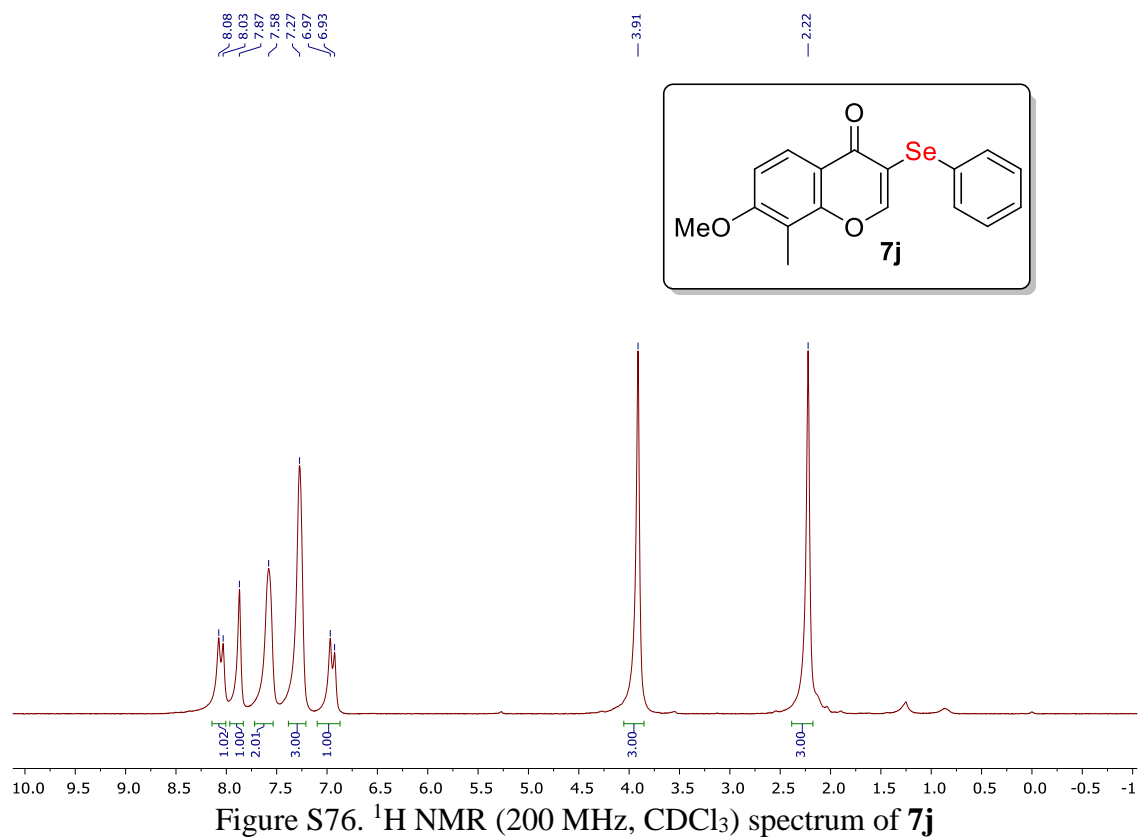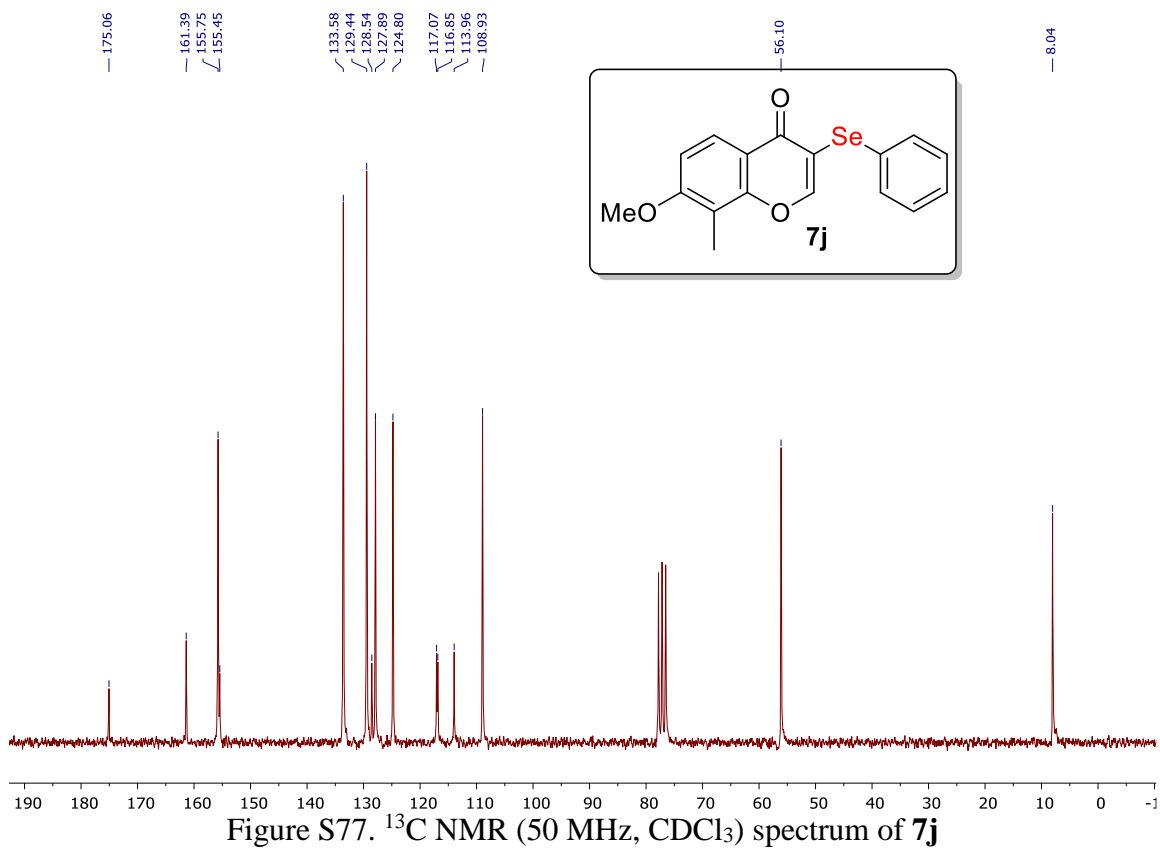



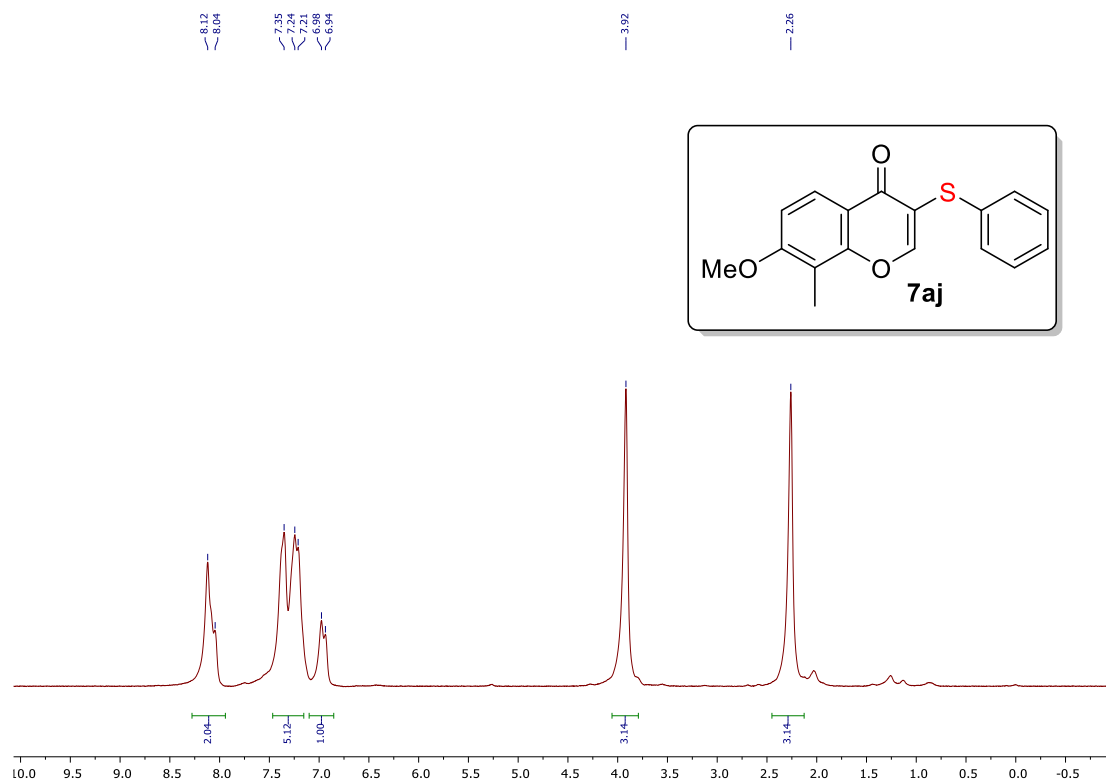Figure S78. <sup>1</sup>H NMR (200 MHz, CDCl<sub>3</sub>) spectrum of **7aj**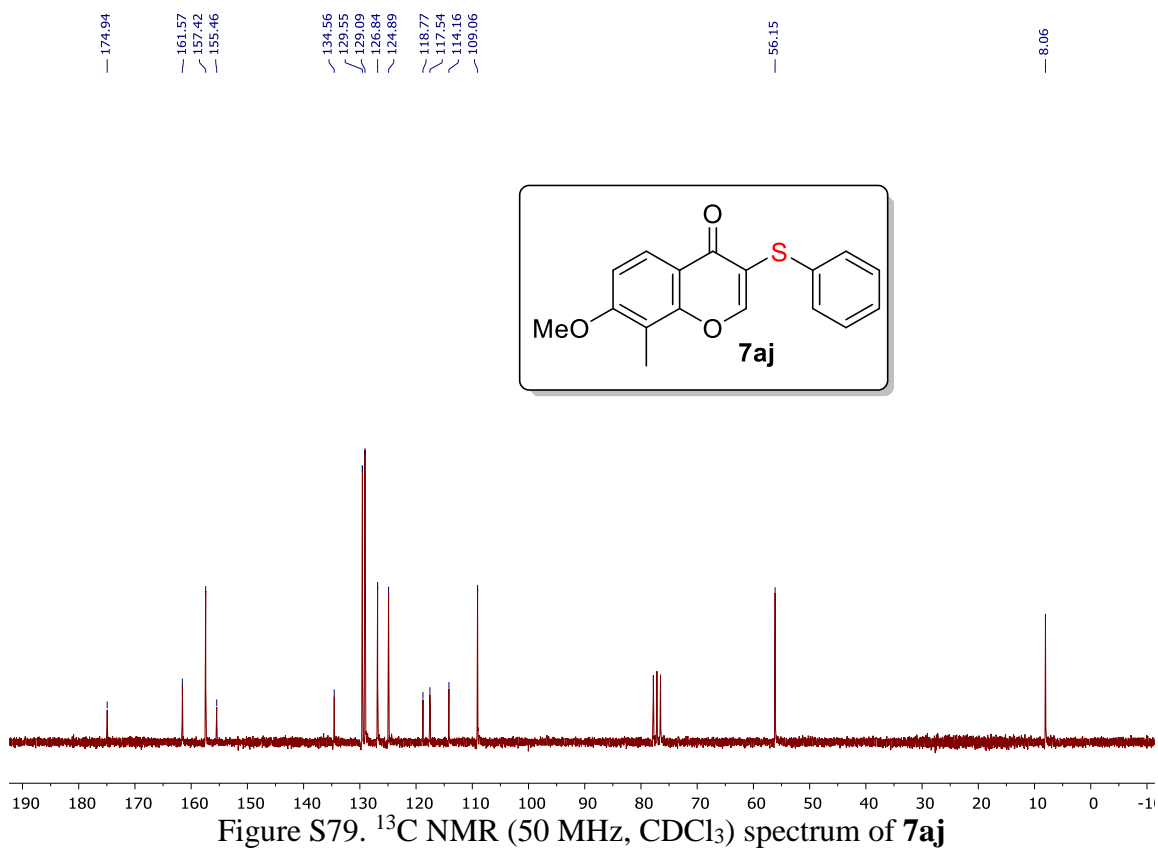Figure S79. <sup>13</sup>C NMR (50 MHz, CDCl<sub>3</sub>) spectrum of **7aj**

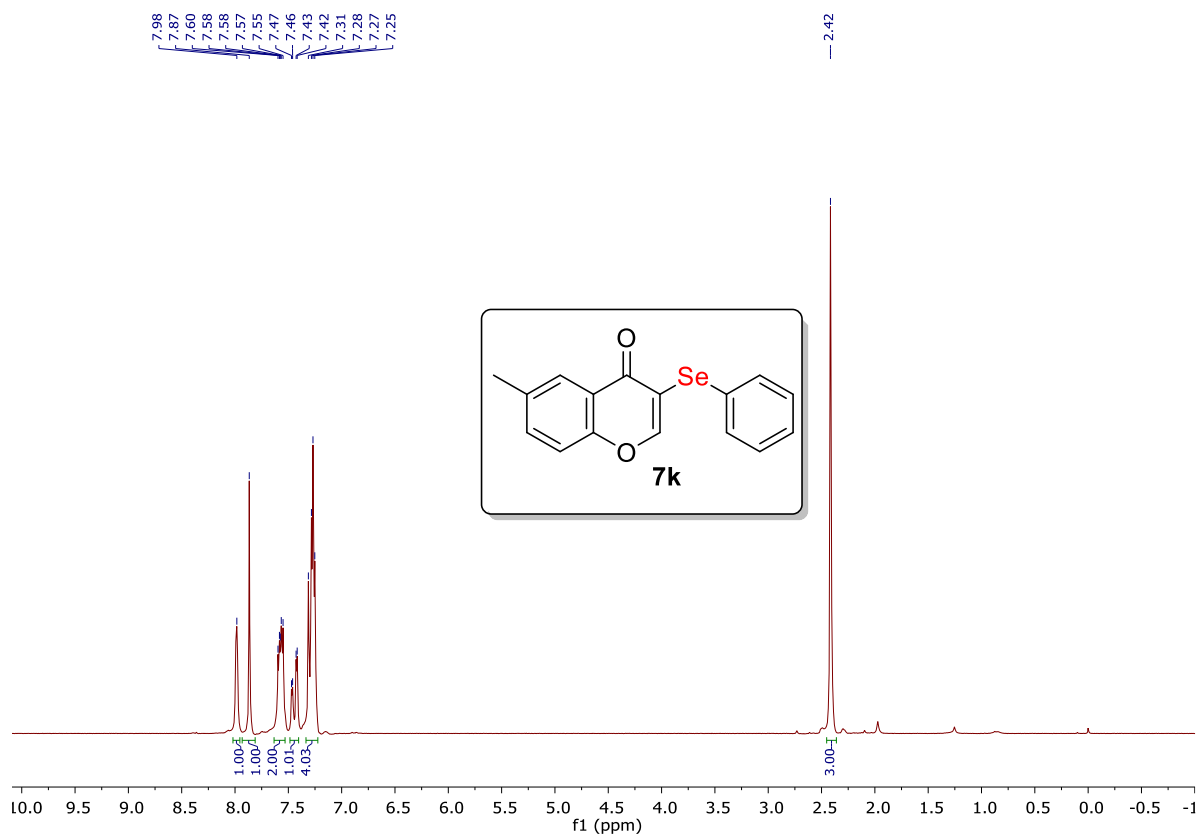Figure S80. <sup>1</sup>H NMR (200 MHz, CDCl<sub>3</sub>) spectrum of **7k**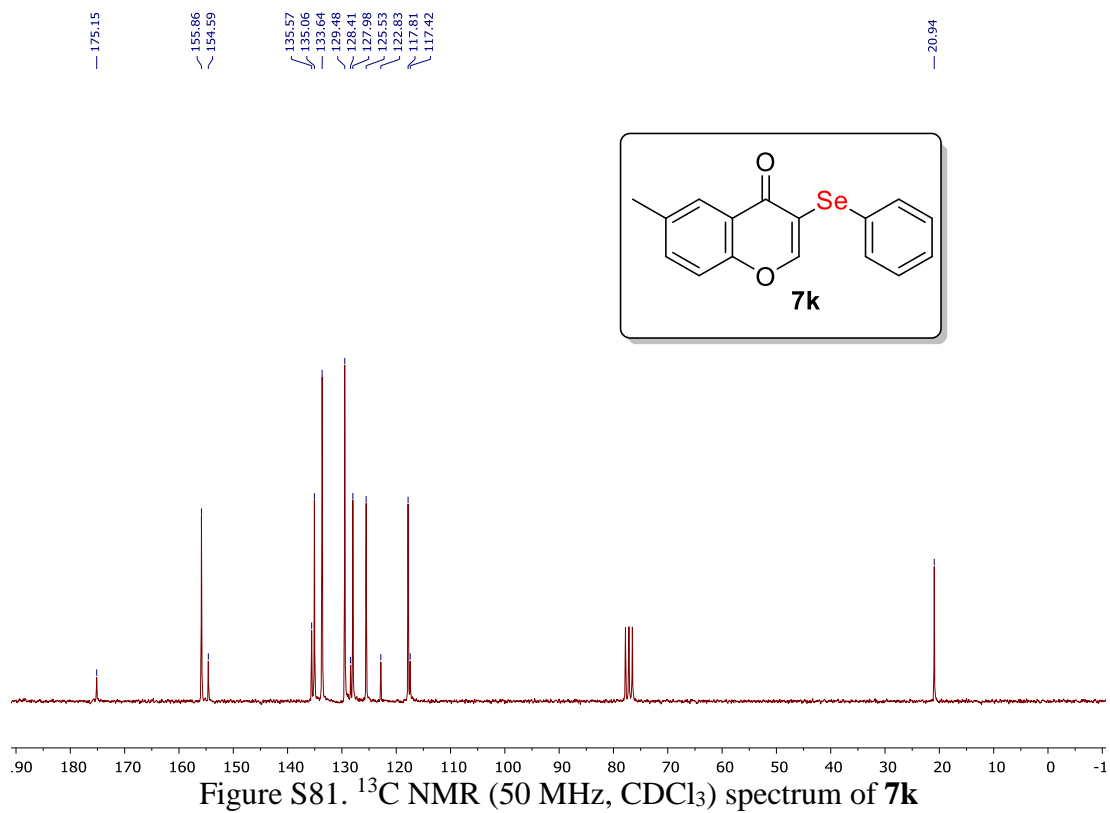Figure S81. <sup>13</sup>C NMR (50 MHz, CDCl<sub>3</sub>) spectrum of **7k**

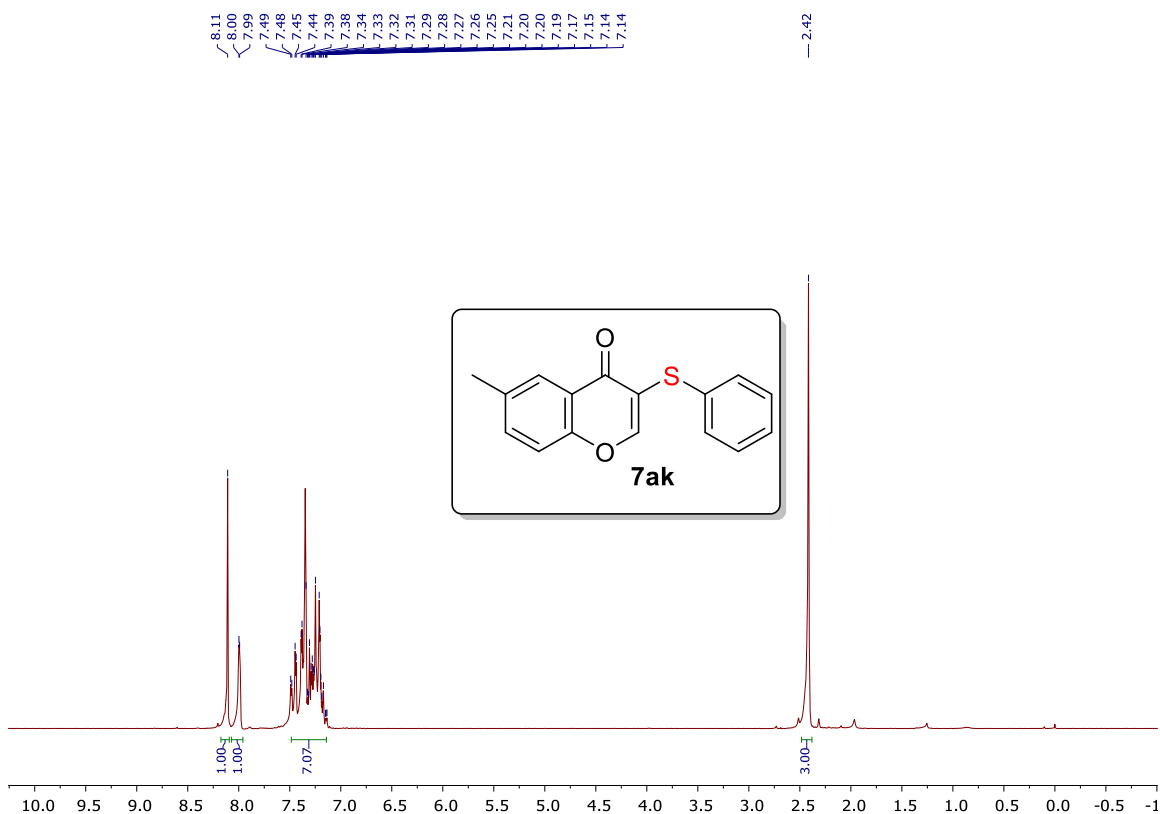

Figure S82.  $^1\text{H}$  NMR (200 MHz,  $\text{CDCl}_3$ ) spectrum of **7ak**

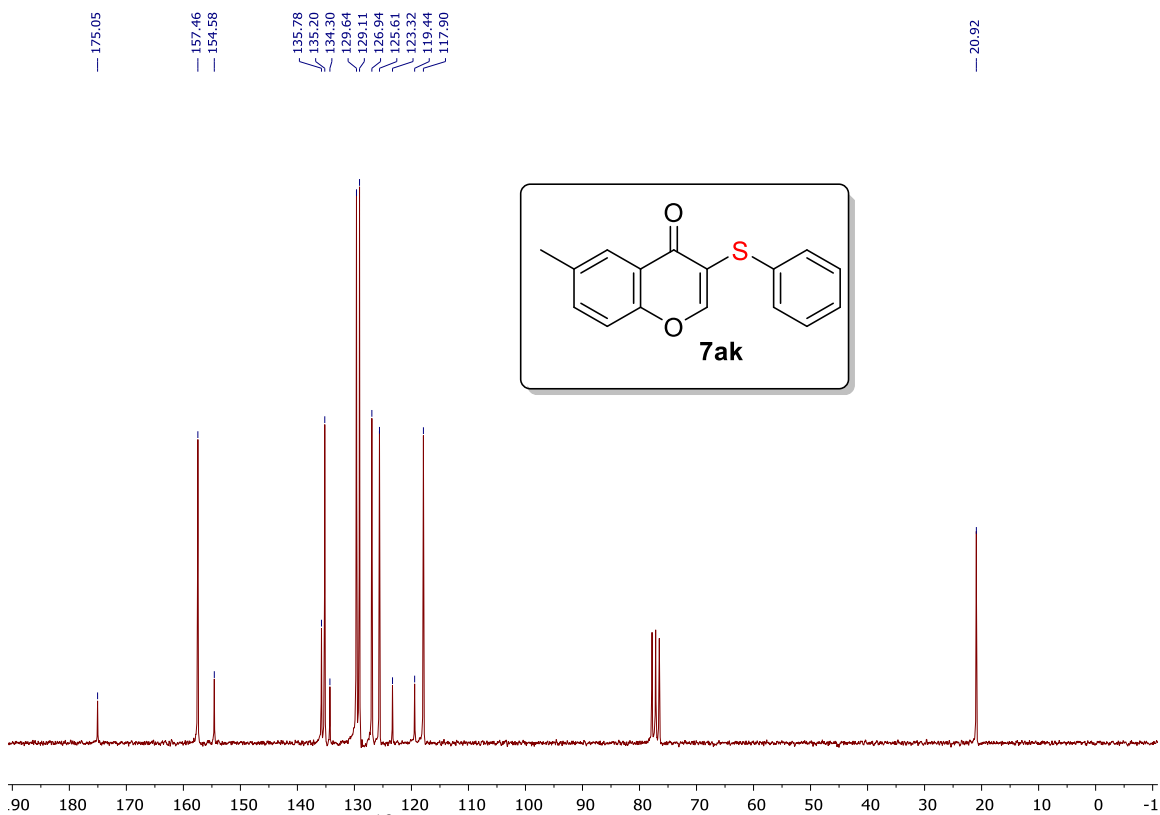

Figure S83.  $^{13}\text{C}$  NMR (50 MHz,  $\text{CDCl}_3$ ) spectrum of **7ak**

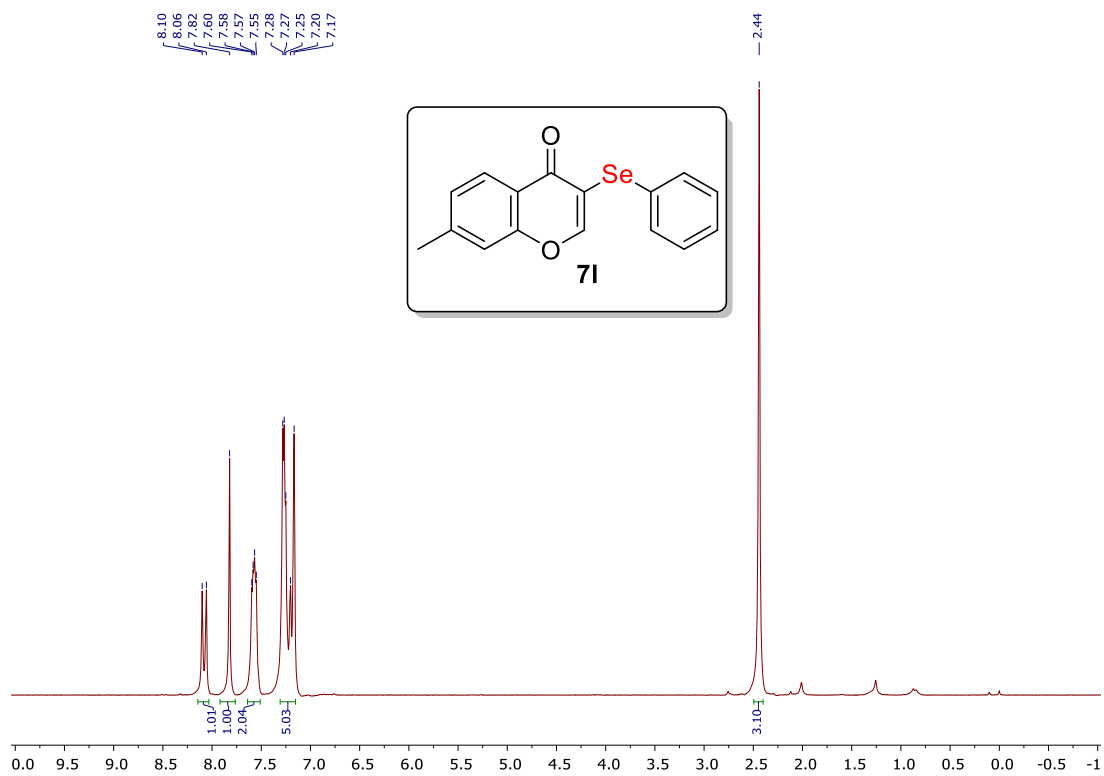Figure S84. <sup>1</sup>H NMR (200 MHz, CDCl<sub>3</sub>) spectrum of **71**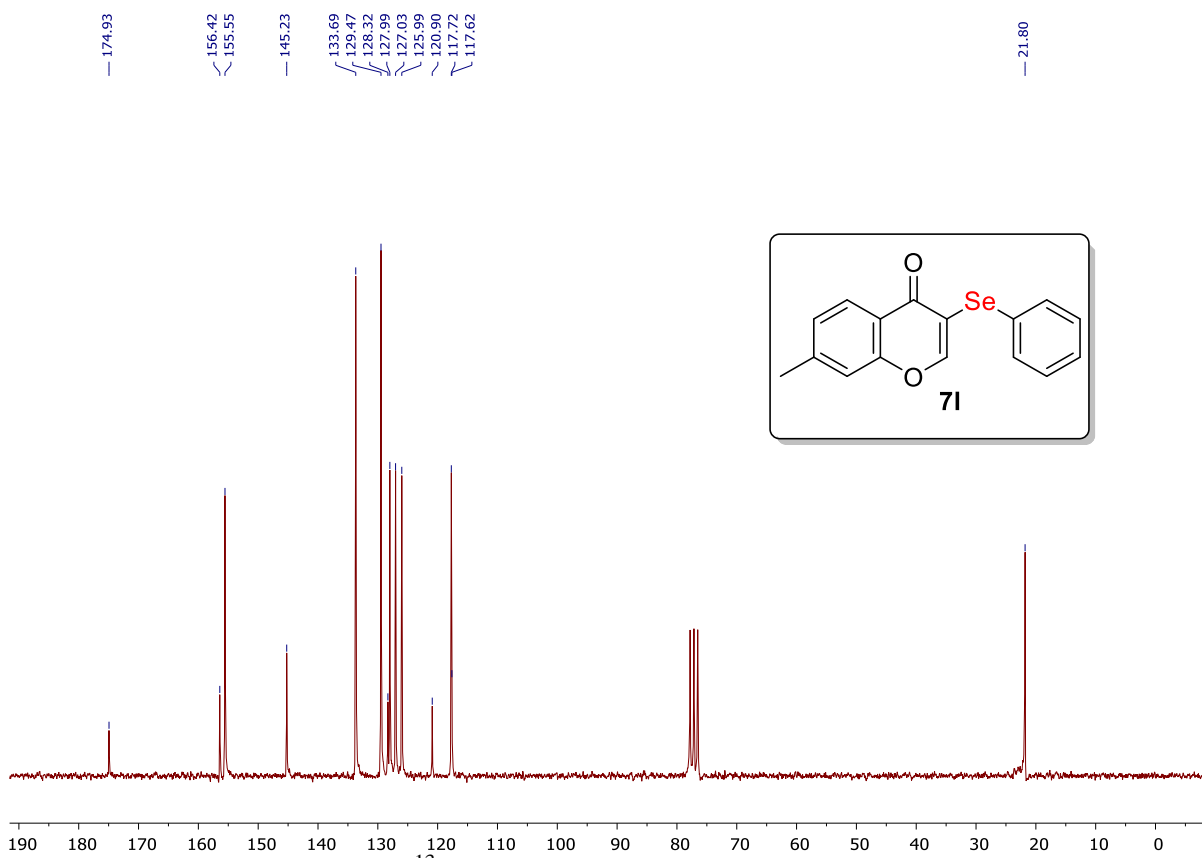Figure S85. <sup>13</sup>C NMR (50 MHz, CDCl<sub>3</sub>) spectrum of **71**

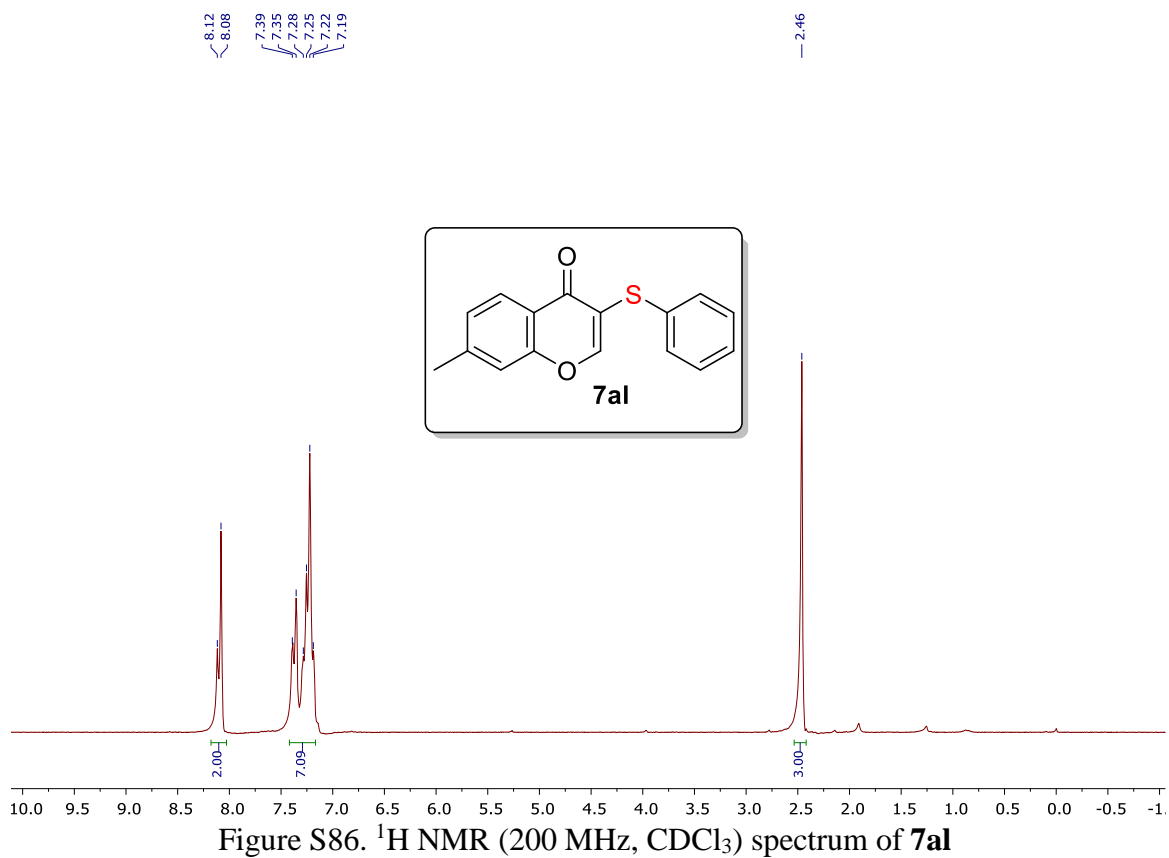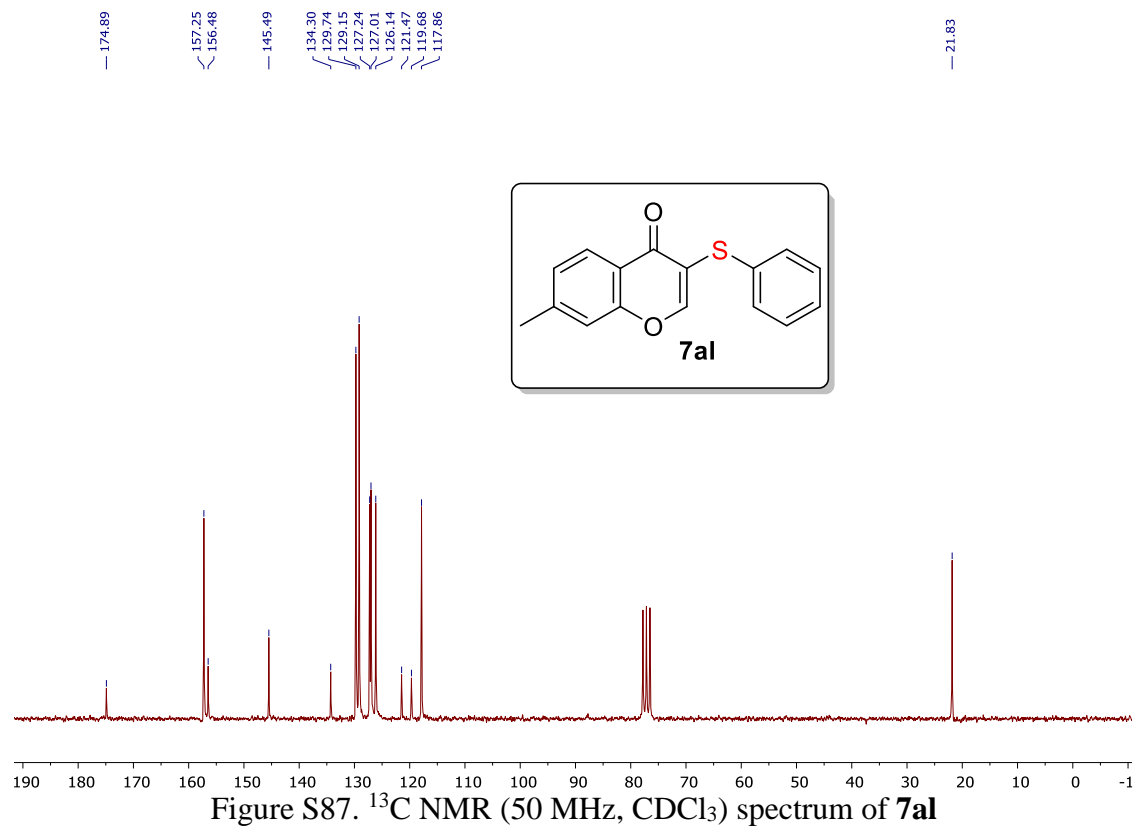

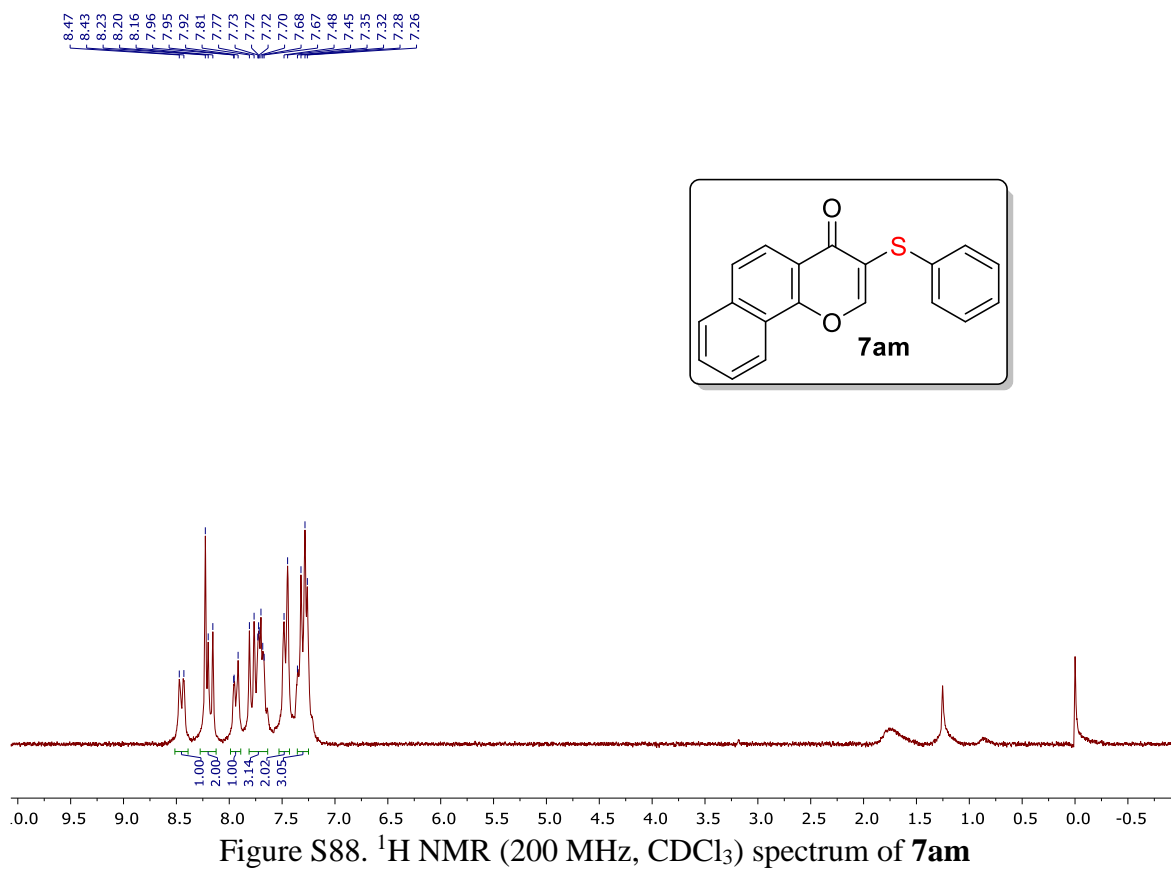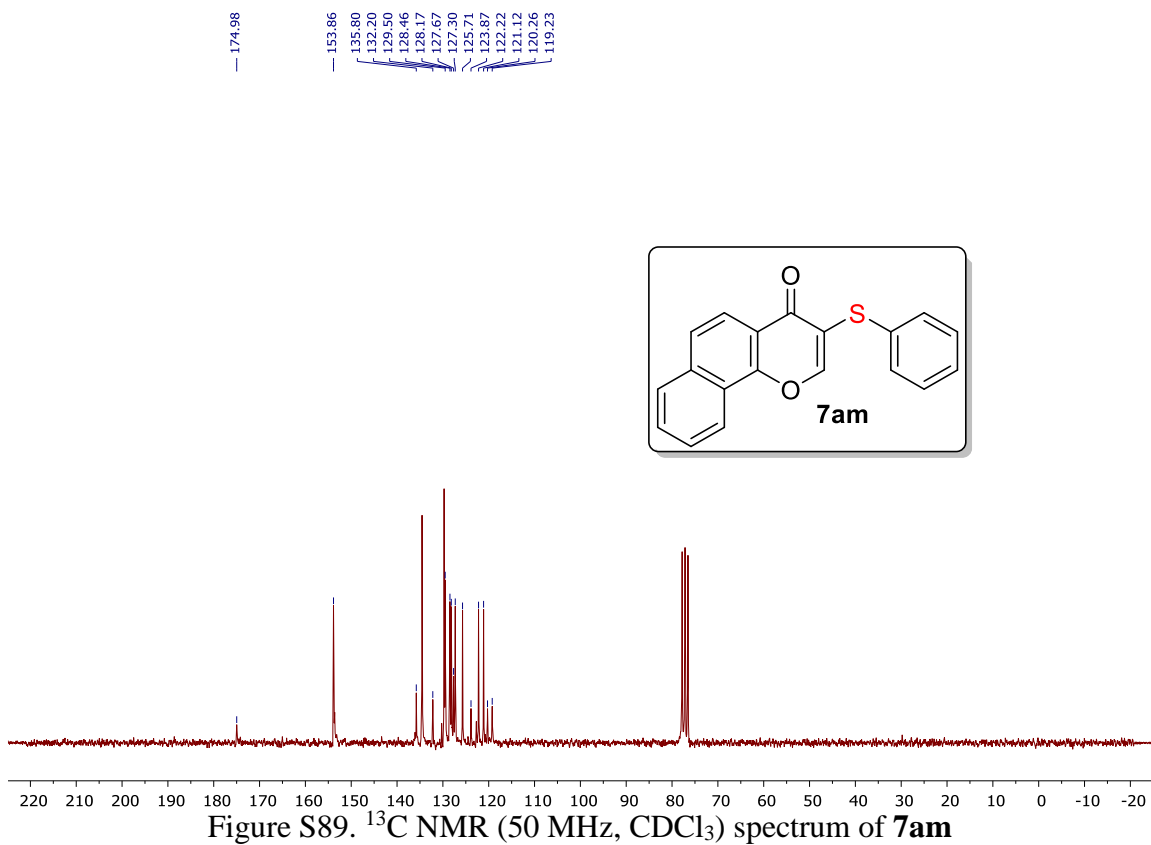

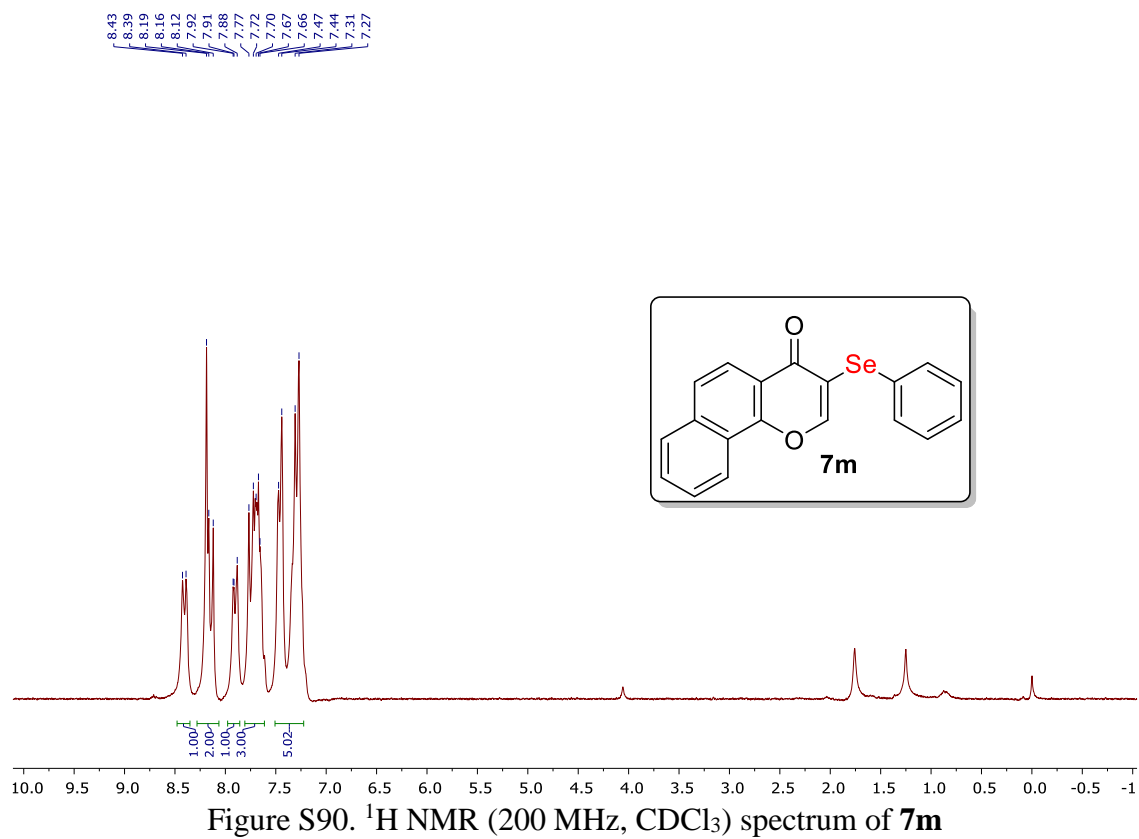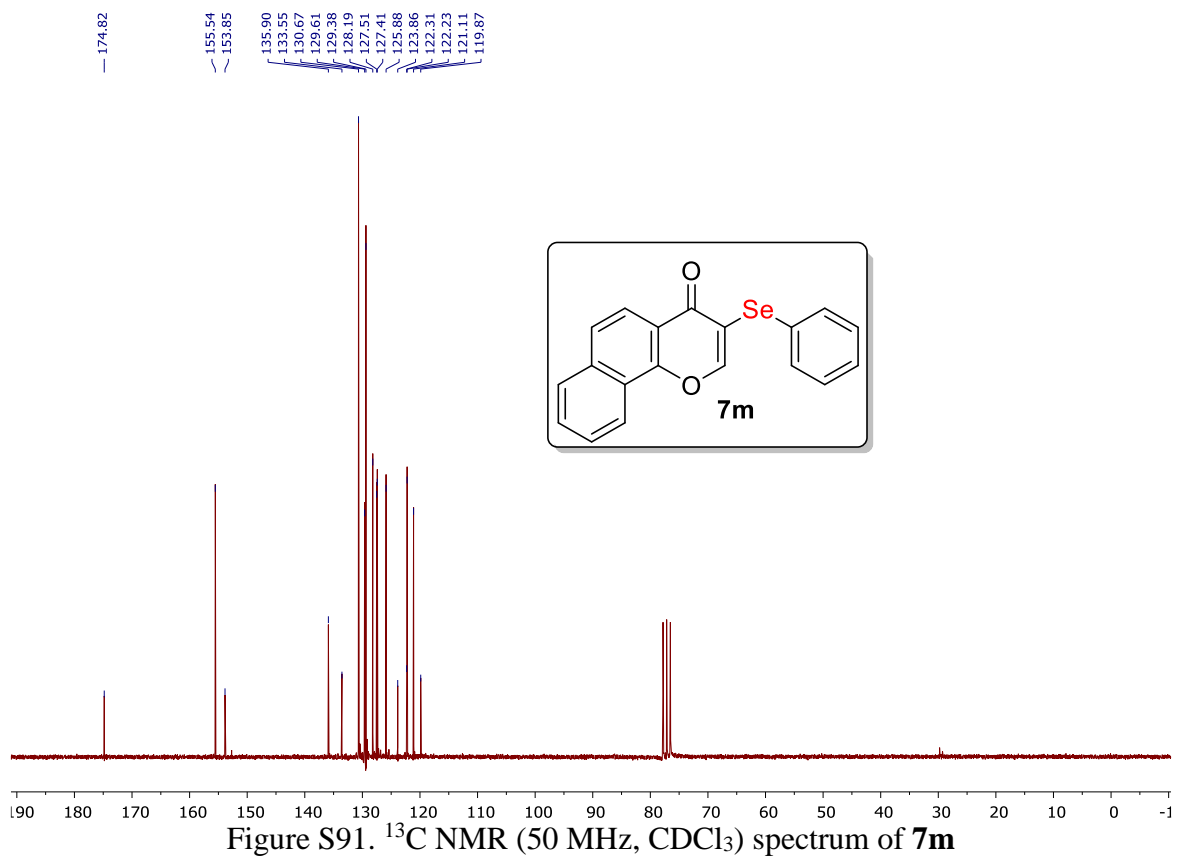

Supplement: ao7b00445_si_001.pdf [file ao7b00445_si_001.pdf]
